# Supplementary material for: Structural, QSAR, machine learning and molecular docking studies of 5-thiophen-2-yl pyrazole derivatives as potent and selective cannabinoid-1 receptor antagonists
Source: Royal Society of Chemistry journal article supplement (doi:10.1039/d1nj02261j), 2021-01-01
Supplement: d1nj02261j1.pdf [file d1nj02261j1.pdf]

## Supplementary Material

### Structural, QSAR, machine learning and molecular docking studies of 5-thiophen-2-yl pyrazole derivatives as potent and selective cannabinoid-1 receptor antagonists

Riadh Hanachi, Ridha Ben Said, Hamza Allal, Seyfeddine Rahali, Mohammed A. M. Alkhalifah, Faisal Alresheedi, Bahoueddine Tangour, Majdi Hochlaf

#### Contents:

|                                                                                                                                                                                                                                                                                                                                                                                                                                                                      |     |
|----------------------------------------------------------------------------------------------------------------------------------------------------------------------------------------------------------------------------------------------------------------------------------------------------------------------------------------------------------------------------------------------------------------------------------------------------------------------|-----|
| <b>Figure S1:</b> Machine learning derived $pIC_{50}$ evolution along logP, SAG, HE NH and MR without considering the D3 dispersion correction in the DFT computations. The relation of B3LYP parameters to $pIC_{50}$ is given by: $pIC_{50} = 3.9548 * E_{HOMO} - 13.7532 * E_{LUMO} - 0.0294 * Pol + 0.0007 * Vol + 0.0056 * SAG + 0.3019 * HE + 0.4842 * logP - 0.1210 * HBA + 0.0576 * TPSA - 0.1551 * N_{atom} + 0.1106 * N_{brot} + 0.1877 * NH + 1.73$ ..... | S2  |
| <b>Figure S2:</b> Correlation plots and diagram of residual values of observed (Observed $pIC_{50}$ ) vs predicted activity (Predicted $pIC_{50}$ ) using B3LYP paramters. The red data are for the external sets for validation. The dotted lines correspond to the linear regression between the predicted and observed $pIC_{50}$ . ....                                                                                                                          | S3  |
| <b>Figure S3:</b> Mutual information diagrams of descriptors obtained using the B3LYP approach.....                                                                                                                                                                                                                                                                                                                                                                  | S4  |
| <b>Table S1:</b> B3LYP+D3/6-311G(d, p) optimized structures of the 5-Thiophen-2-ylpyrazole derivatives understudy. We used the numbering used in Ref. [1]. Similar shapes were obtained at the B3LYP/6-311G(d, p). Their Cartesian coordinates are given in Table S7.....                                                                                                                                                                                            | S5  |
| <b>Table S2:</b> Intramolecular distances between the Cl atom of 2,4-dichlorophenyl and 4-chlorophenyl/thiophenyl (d1, in Å) and between H/S atoms of 4-chlorophenyl/thiophenyl and the 2,4-dichlorophenyl (d2, in Å) as defined in Figure 1. The atoms were described by the 6-311G(d, p) basis set.....                                                                                                                                                            | S9  |
| <b>Table S3:</b> Volume (Vol, Å <sup>3</sup> ) and volume change ( $\Delta Vol$ , Å <sup>3</sup> ) and % of changes of the 5-thiophen-2-ylpyrazole derivatives understudy. We used the numbering of Ref [1].....                                                                                                                                                                                                                                                     | S11 |
| <b>Table S4:</b> Measured $pIC_{50}$ , predicted $pIC_{50}$ and residual values with and without consideration of the dispersion correction.....                                                                                                                                                                                                                                                                                                                     | S13 |
| <b>Table S5:</b> Physicochemical properties of 5-thiophen-2-yl pyrazoles derivatives with and without D3. For each compound, we give the energies of the HOMO ( $E_{HOMO}$ , a.u.) and LUMO ( $E_{LUMO}$ , a.u.) orbitals, HOMO – LUMO gap ( $\Delta E$ , eV), Pol, Vol (Å <sup>3</sup> ), SAG (in Å <sup>3</sup> ) and HE (kcal/mol). The atoms were described using the 6-311G(d, p) basis set.....                                                                | S14 |

**Table S6:** Drug-likeness parameters and lipophilicity indices for the 5-thiophen-2-yl pyrazole derivatives under study. See text for the definition of these parameters and their description. \* and # denote the selected compounds for external validation (test sets). \* (#) for the model using B3LYP/6-311G(d, p) (B3LYP+D3/6-311G(d, p)) optimized structures.....S16

**Table S7:** Cartesian coordinates of compounds 6 - 48 (in angstroms) calculated using the B3LYP/6-311 g(d,p) approach with and without considering the dispersion correction (D3).....S18

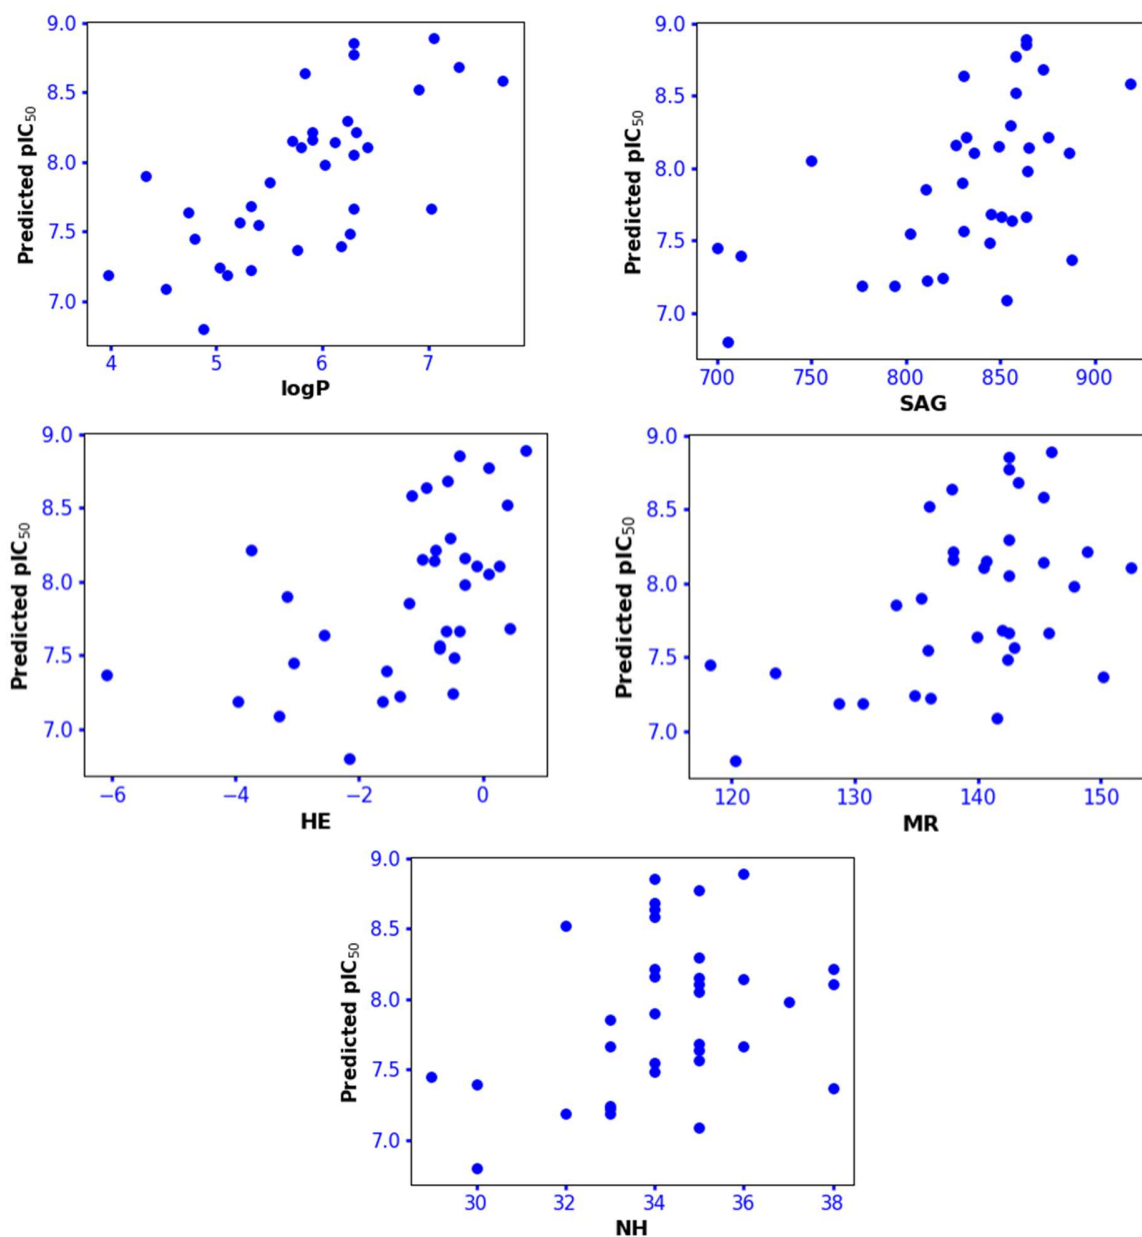

**Figure S1:** Machine learning derived  $pIC_{50}$  evolution along  $\log P$ , SAG, HE, NH and MR without considering the D3 dispersion correction in the DFT computations. The relation of B3LYP parameters to  $pIC_{50}$  is given by:  $pIC_{50} = 3.9548 \cdot E_{HOMO} - 13.7532 \cdot E_{LUMO} - 0.0294 \cdot \text{Pol} + 0.0007 \cdot \text{Vol} + 0.0056 \cdot \text{SAG} + 0.3019 \cdot \text{HE} + 0.4842 \cdot \log P - 0.1210 \cdot \text{HBA} + 0.0576 \cdot \text{TPSA} - 0.1551 \cdot N_{\text{atom}} + 0.1106 \cdot N_{\text{brot}} + 0.1877 \cdot \text{NH} + 1.73$

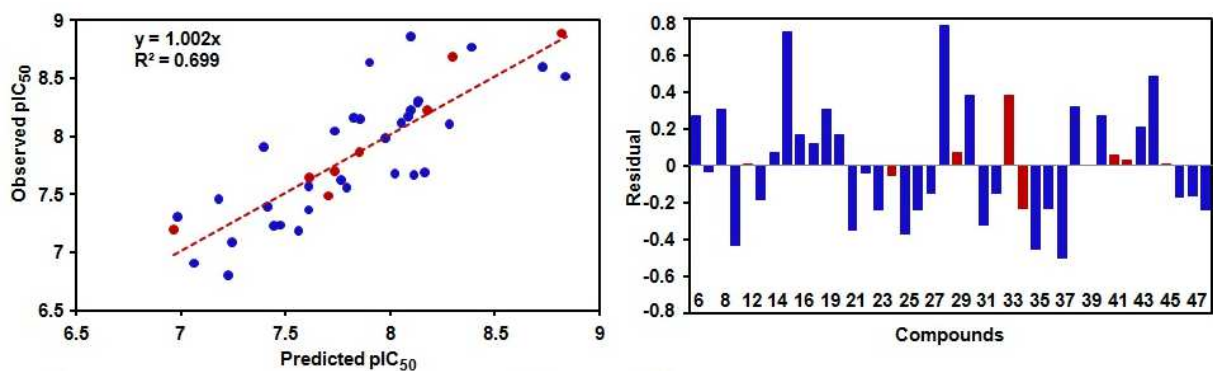

**Figure S2:** Correlation plots and diagram of residual values of observed (Observed pIC<sub>50</sub>) vs predicted activity (Predicted pIC<sub>50</sub>) using B3LYP parameters. The red data are for the external sets for validation. The dotted lines correspond to the linear regression between the predicted and observed pIC<sub>50</sub>.

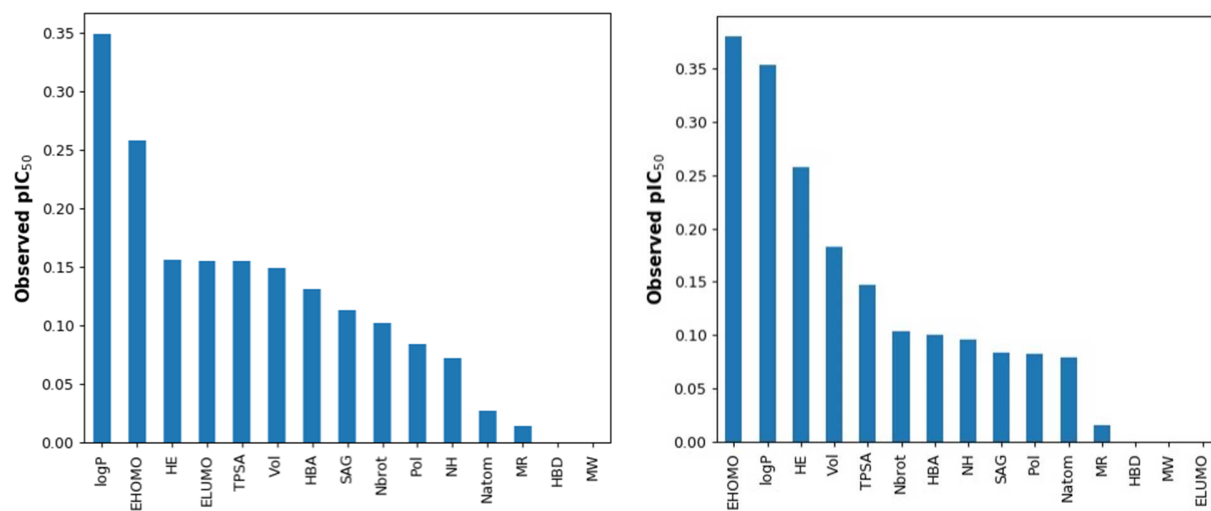

**Figure S3:** Mutual information diagrams of descriptors obtained using the B3LYP approach.

**Table S1:** B3LYP+D3/6-311G(d, p) optimized structures of the 5-Thiophen-2-ylpyrazole derivatives under study. We used the numbering used in Ref. [1]. Similar shapes were obtained at the B3LYP/6-311G(d, p). Their Cartesian coordinates are given in Table S7.

| N  | Structure                                                                           | N  | Structure                                                                            | N  | Structure                                                                             |
|----|-------------------------------------------------------------------------------------|----|--------------------------------------------------------------------------------------|----|---------------------------------------------------------------------------------------|
| 6  | 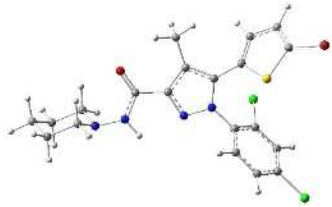   | 7  |    | 8  |    |
| 9  |    | 12 |    | 13 |    |
| 14 |    | 15 |    | 16 |    |
| 18 |  | 19 |  | 20 |  |

|    |                                                                                     |    |                                                                                      |    |                                                                                       |
|----|-------------------------------------------------------------------------------------|----|--------------------------------------------------------------------------------------|----|---------------------------------------------------------------------------------------|
| 21 | 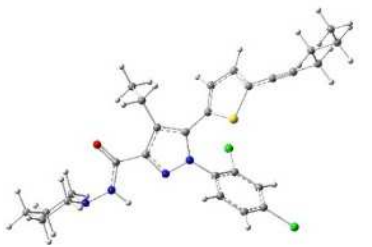   | 22 |    | 23 |    |
| 24 |    | 25 |    | 26 |    |
| 27 |    | 28 |    | 29 |    |
| 30 |  | 31 |  | 32 |  |

|    |                                                                                    |    |                                                                                     |    |                                                                                      |
|----|------------------------------------------------------------------------------------|----|-------------------------------------------------------------------------------------|----|--------------------------------------------------------------------------------------|
| 33 | 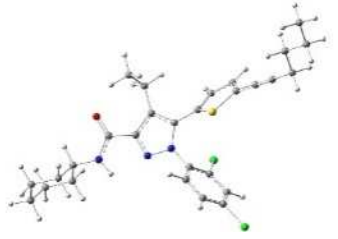  | 34 |   | 35 |   |
| 36 |   | 37 |   | 38 |   |
| 39 |   | 40 |   | 41 |   |
| 42 |  | 43 |  | 44 |  |



|    |                                                                                   |    |                                                                                    |    |                                                                                     |
|----|-----------------------------------------------------------------------------------|----|------------------------------------------------------------------------------------|----|-------------------------------------------------------------------------------------|
| 45 | 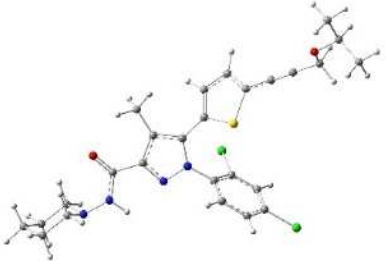 | 46 |  | 47 |  |
| 48 |  |    |                                                                                    |    |                                                                                     |

**Table S2:** Intramolecular distances between the Cl atom of 2,4-dichlorophenyl and 4-chlorophenyl/thiophenyl (d1, in Å) and between H/S atoms of 4-chlorophenyl/thiophenyl and the 2,4-dichlorophenyl (d2, in Å) as defined in Figure 1. The atoms were described by the 6-311G(d, p) basis set.

| Compounds                                                        | d1    |          | d2    |          |
|------------------------------------------------------------------|-------|----------|-------|----------|
|                                                                  | B3LYP | B3LYP+D3 | B3LYP | B3LYP+D3 |
| 5-(thiophen-2-yl)-1-(2,4-dichlorophenyl)<br>-1H-pyrazole         | 4.06  | 3.87     | 3.88  | 3.74     |
| 5-(5-chlorothiophen-2-yl)-1-(2,4-dichlorophenyl)<br>-1H-pyrazole | 4.07  | 3.87     | 3.88  | 3.71     |
| Rimonabant                                                       | 4.10  | 3.87     | 3.42  | 3.22     |
| 6                                                                | 3.64  | 3.87     | 3.87  | 3.76     |
| 7                                                                | 4.12  | 3.88     | 3.90  | 3.74     |
| 8                                                                | 4.12  | 3.88     | 3.91  | 3.73     |
| 9                                                                | 4.12  | 3.87     | 3.90  | 3.73     |
| 12                                                               | 4.10  | 3.78     | 3.88  | 3.72     |
| 13                                                               | 4.12  | 3.87     | 3.87  | 3.73     |
| 14                                                               | 4.11  | 3.87     | 3.87  | 3.73     |
| 15                                                               | 4.10  | 3.87     | 3.87  | 3.72     |
| 16                                                               | 4.11  | 3.87     | 3.87  | 3.73     |
| 18                                                               | 4.12  | 3.88     | 3.89  | 3.73     |
| 19                                                               | 4.21  | 3.89     | 4.02  | 3.80     |
| 20                                                               | 4.20  | 3.89     | 4.03  | 3.80     |
| 21                                                               | 4.03  | 3.88     | 3.89  | 3.73     |
| 22                                                               | 4.09  | 3.86     | 3.87  | 3.72     |
| 23                                                               | 4.11  | 3.87     | 3.91  | 3.74     |
| 24                                                               | 4.12  | 3.86     | 3.91  | 3.74     |

|    |       |       |      |      |
|----|-------|-------|------|------|
| 25 | 4.11  | 3.88  | 3.88 | 3.72 |
| 26 | 4.12  | 3.87  | 3.88 | 3.73 |
| 27 | 4.11  | 3.87  | 3.87 | 3.73 |
| 28 | 4.12  | 3.88  | 3.89 | 3.73 |
| 29 | 4.04  | 3.89  | 3.92 | 3.72 |
| 30 | 4.11  | 3.87  | 3.88 | 3.73 |
| 31 | 4.21  | 3.89  | 4.02 | 3.80 |
| 32 | 4.15  | 3.89  | 4.04 | 3.73 |
| 33 | 4.20  | 3.89  | 4.02 | 3.80 |
| 34 | 4.10  | 3.88  | 3.89 | 3.72 |
| 35 | 4.11  | 3.85  | 3.87 | 3.73 |
| 36 | 4.13  | 3.88  | 3.89 | 3.73 |
| 37 | 4.11  | 3.89  | 3.89 | 3.72 |
| 38 | 4.12  | 3.87  | 3.97 | 3.72 |
| 39 | 4.12  | 3.87  | 3.87 | 3.73 |
| 40 | 4.11  | 3.87  | 3.87 | 3.72 |
| 41 | 4.12  | 3.87  | 3.87 | 3.73 |
| 42 | 4.10  | 3.88  | 3.88 | 3.72 |
| 43 | 4.11  | 3.88  | 3.87 | 3.72 |
| 44 | 4.11  | 3.88  | 3.87 | 3.72 |
| 45 | 4.04  | 3.88  | 3.84 | 3.72 |
| 46 | 4.105 | 3.869 | 3.88 | 3.72 |
| 47 | 4.105 | 3.873 | 3.87 | 3.72 |
| 48 | 4.110 | 3.883 | 3.87 | 3.72 |

**Table S3:** Volume (Vol, Å<sup>3</sup>) and volume change ( $\Delta$ Vol, Å<sup>3</sup>) and % of changes of the 5-thiophen-2-ylpyrazole derivatives understudy. We used the numbering used in Ref. [1]

| Compounds | B3LYP6-311G(d, p) | B3LYP+D3/6-311G(d, p) | $\Delta$ Vol | %        |
|-----------|-------------------|-----------------------|--------------|----------|
| 6         | 1202.96           | 1196.38               | 6.58         | 0.549992 |
| 7         | 1253.3            | 1238.38               | 14.92        | 1.2048   |
| 8*        | 1183.98           | 1176.69               | 7.29         | 0.619534 |
| 9         | 1227.01           | 1218.36               | 8.65         | 0.709971 |
| 12        | 1382.04           | 1376.5                | 5.54         | 0.40247  |
| 13        | 1447.29           | 1434.67               | 12.62        | 0.879645 |
| 14        | 1427.54           | 1417.75               | 9.79         | 0.690531 |
| 15        | 1429.17           | 1420.66               | 8.51         | 0.599017 |
| 16*       | 1471.76           | 1460.29               | 11.47        | 0.78546  |
| 18        | 1426.29           | 1419.35               | 6.94         | 0.488956 |
| 19        | 1478.73           | 1466.11               | 12.62        | 0.860781 |
| 20        | 1479.36           | 1468.72               | 10.64        | 0.72444  |
| 21        | 1482.83           | 1473.91               | 8.92         | 0.605193 |
| 22        | 1453.62           | 1442.35               | 11.27        | 0.781364 |
| 23        | 1407.1            | 1398.13               | 8.97         | 0.641571 |
| 24        | 1471.03           | 1458.37               | 12.66        | 0.868092 |
| 25        | 1382.73           | 1320.98               | 61.75        | 4.67456  |
| 26        | 1394.16           | 1382.42               | 11.74        | 0.849235 |
| 27*       | 1374              | 1365.38               | 8.62         | 0.631326 |
| 28        | 1482.83           | 1473.91               | 8.92         | 0.605193 |
| 29        | 1508.8            | 1491.48               | 17.32        | 1.16126  |
| 30        | 1480.63           | 1471.12               | 9.51         | 0.646446 |

|     |         |         |       |          |
|-----|---------|---------|-------|----------|
| 31  | 1453.88 | 1445.83 | 8.05  | 0.556774 |
| 32  | 1564.05 | 1556.97 | 7.08  | 0.454729 |
| 33  | 1505.29 | 1494.53 | 10.76 | 0.719959 |
| 34  | 1468.01 | 1461.75 | 6.26  | 0.428254 |
| 35  | 1496.48 | 1469.46 | 27.02 | 1.83877  |
| 36  | 1400.69 | 1392.05 | 8.64  | 0.620667 |
| 37* | 1425.49 | 1412.76 | 12.73 | 0.901073 |
| 38  | 1454.86 | 1446.25 | 8.61  | 0.595333 |
| 39  | 1509.15 | 1498.01 | 11.14 | 0.743653 |
| 40  | 1495.31 | 1487.32 | 7.99  | 0.537208 |
| 41  | 1552.72 | 1539.03 | 13.69 | 0.889521 |
| 42  | 1500.48 | 1494.19 | 6.29  | 0.420964 |
| 43  | 1355.43 | 1350.92 | 4.51  | 0.333847 |
| 44  | 1414.6  | 1407.82 | 6.78  | 0.481596 |
| 45  | 1462.8  | 1455.33 | 7.47  | 0.513286 |
| 46  | 1469.54 | 1460.57 | 8.97  | 0.614144 |
| 47* | 1412.65 | 1404.01 | 8.64  | 0.61538  |
| 48  | 1523.19 | 1514.85 | 8.34  | 0.55055  |

**Table S4:** Measured pIC<sub>50</sub>, predicted pIC<sub>50</sub> and residual values with and without consideration of the dispersion correction.

| Compounds | Observed pIC <sub>50</sub> | B3LYP/6-311G(d, p)          |          | B3LYP+D3/6-311G(d, p)       |          |
|-----------|----------------------------|-----------------------------|----------|-----------------------------|----------|
|           |                            | Predicted pIC <sub>50</sub> | Residual | Predicted pIC <sub>50</sub> | Residual |
| 6         | 7.45                       | 7.18                        | 0.27     | 7.29                        | 0.15     |
| 7         | 7.39                       | 7.42                        | -0.03    | 7.14                        | 0.25     |
| 8         | 7.30                       | 6.99                        | 0.31     | 7.09                        | 0.21     |
| 9         | 6.80                       | 7.23                        | -0.43    | 7.12                        | -0.32    |
| 12        | 7.86                       | 7.85                        | 0.01     | 7.96                        | -0.10    |
| 13        | 8.10                       | 8.28                        | -0.18    | 8.02                        | 0.08     |
| 14        | 8.16                       | 8.09                        | 0.07     | 8.12                        | 0.03     |
| 15        | 8.64                       | 7.90                        | 0.73     | 8.01                        | 0.63     |
| 16        | 8.31                       | 8.14                        | 0.17     | 8.07                        | 0.24     |
| 18        | 8.22                       | 8.10                        | 0.12     | 8.14                        | 0.08     |
| 19        | 8.05                       | 7.74                        | 0.31     | 8.32                        | -0.27    |
| 20        | 8.29                       | 8.13                        | 0.17     | 8.25                        | 0.04     |
| 21        | 7.67                       | 8.02                        | -0.35    | 8.16                        | -0.50    |
| 22        | 7.56                       | 7.61                        | -0.04    | 7.29                        | 0.27     |
| 23        | 7.24                       | 7.48                        | -0.24    | 7.63                        | -0.39    |
| 24        | 7.69                       | 7.74                        | -0.05    | 7.53                        | 0.15     |
| 25        | 7.18                       | 7.56                        | -0.37    | 7.76                        | -0.58    |
| 26        | 7.55                       | 7.79                        | -0.24    | 7.75                        | -0.21    |
| 27        | 7.62                       | 7.77                        | -0.15    | 7.86                        | -0.25    |
| 28        | 8.85                       | 8.10                        | 0.76     | 8.27                        | 0.58     |
| 29        | 8.89                       | 8.82                        | 0.07     | 8.68                        | 0.20     |
| 30        | 8.77                       | 8.39                        | 0.38     | 8.48                        | 0.29     |
| 31        | 8.52                       | 8.84                        | -0.32    | 8.94                        | -0.42    |
| 32        | 8.59                       | 8.73                        | -0.15    | 8.50                        | 0.08     |
| 33        | 8.68                       | 8.30                        | 0.38     | 8.68                        | 0.00     |
| 34        | 7.49                       | 7.71                        | -0.23    | 7.74                        | -0.26    |
| 35        | 7.66                       | 8.11                        | -0.45    | 7.98                        | -0.32    |
| 36        | 7.22                       | 7.45                        | -0.23    | 7.52                        | -0.30    |
| 37        | 7.68                       | 8.17                        | -0.50    | 8.07                        | -0.39    |
| 38        | 8.15                       | 7.83                        | 0.32     | 8.13                        | 0.01     |
| 39        | 7.98                       | 7.98                        | 0.00     | 7.94                        | 0.04     |
| 40        | 8.14                       | 7.86                        | 0.27     | 8.10                        | 0.04     |
| 41        | 8.11                       | 8.05                        | 0.06     | 8.00                        | 0.11     |
| 42        | 8.22                       | 8.18                        | 0.03     | 8.35                        | -0.14    |
| 43        | 7.19                       | 6.97                        | 0.21     | 7.09                        | 0.09     |
| 44        | 7.90                       | 7.40                        | 0.49     | 7.58                        | 0.31     |
| 45        | 7.64                       | 7.62                        | 0.01     | 7.80                        | -0.17    |
| 46        | 7.08                       | 7.25                        | -0.17    | 7.18                        | -0.10    |
| 47        | 6.91                       | 7.07                        | -0.16    | 7.21                        | -0.30    |
| 48        | 7.37                       | 7.61                        | -0.24    | 7.69                        | -0.33    |

**Table S5:** Physicochemical properties of 5-thiophen-2-yl pyrazoles derivatives with and without D3. For each compound, we give the energies of the HOMO ( $E_{\text{HOMO}}$ , a.u.) and LUMO ( $E_{\text{LUMO}}$ , a.u.) orbitals, HOMO – LUMO gap ( $\Delta E$ , eV), Pol, Vol ( $\text{\AA}^3$ ), SAG (in  $\text{\AA}^3$ ) and HE (kcal/mol). The atoms were described using the 6-311G(d, p) basis set.

| Compound | B3LYP             |                   |            |       |         |        |       | B3LYP+D3          |                   |            |       |         |        |       |
|----------|-------------------|-------------------|------------|-------|---------|--------|-------|-------------------|-------------------|------------|-------|---------|--------|-------|
|          | $E_{\text{HOMO}}$ | $E_{\text{LUMO}}$ | $\Delta E$ | Pol   | Vol     | SAG    | HE    | $E_{\text{HOMO}}$ | $E_{\text{LUMO}}$ | $\Delta E$ | Pol   | Vol     | SAG    | HE    |
| 6        | -0.22308          | -0.06218          | 4.378      | 47.91 | 1202.96 | 700.16 | -3.07 | -0.22371          | -0.06475          | 4.325      | 47.91 | 1196.38 | 693.22 | -3.00 |
| 7        | -0.22041          | -0.06119          | 4.332      | 50.23 | 1253.3  | 712.58 | -1.55 | -0.22100          | -0.06371          | 4.280      | 50.23 | 1238.38 | 702.90 | -2.07 |
| 8        | -0.22328          | -0.06260          | 4.372      | 47.21 | 1183.98 | 690.33 | -3.07 | -0.22388          | -0.06503          | 4.322      | 47.21 | 1176.69 | 684.02 | -3.01 |
| 9        | -0.22051          | -0.06153          | 4.326      | 49.04 | 1227.01 | 705.42 | -2.17 | -0.22189          | -0.06407          | 4.294      | 49.04 | 1218.36 | 692.98 | -2.06 |
| 12       | -0.21867          | -0.06244          | 4.251      | 53.35 | 1382.04 | 810.77 | -1.19 | -0.21754          | -0.06434          | 4.168      | 53.35 | 1376.50 | 799.57 | -1.15 |
| 13       | -0.21769          | -0.06126          | 4.256      | 56.25 | 1447.29 | 835.88 | 0.27  | -0.21649          | -0.06376          | 4.156      | 56.25 | 1434.67 | 815.42 | -0.16 |
| 14       | -0.21740          | -0.06132          | 4.247      | 55.19 | 1427.54 | 826.24 | -0.29 | -0.21636          | -0.06340          | 4.162      | 55.19 | 1417.75 | 814.42 | -0.22 |
| 15       | -0.21886          | -0.06277          | 4.247      | 55.19 | 1429.17 | 830.41 | -0.92 | -0.21776          | -0.06468          | 4.165      | 55.19 | 1420.66 | 823.11 | -0.88 |
| 16       | -0.21755          | -0.06166          | 4.242      | 57.02 | 1471.76 | 845.91 | -0.02 | -0.21662          | -0.06370          | 4.161      | 57.02 | 1460.29 | 834.92 | -0.06 |
| 18       | -0.21909          | -0.06216          | 4.270      | 55.19 | 1426.29 | 832.09 | -0.76 | -0.21761          | -0.06401          | 4.179      | 55.19 | 1419.35 | 821.00 | -0.73 |
| 19       | -0.21839          | -0.05864          | 4.347      | 57.02 | 1478.73 | 749.61 | 0.09  | -0.21789          | -0.06104          | 4.268      | 57.02 | 1466.11 | 839.50 | 0.17  |
| 20       | -0.22011          | -0.05992          | 4.359      | 57.02 | 1479.36 | 855.51 | -0.53 | -0.21905          | -0.06227          | 4.266      | 57.02 | 1468.72 | 849.77 | -0.47 |
| 21       | -0.21881          | -0.06196          | 4.268      | 57.02 | 1482.83 | 863.67 | -0.37 | -0.21732          | -0.06383          | 4.176      | 57.02 | 1473.91 | 857.74 | -0.34 |
| 22       | -0.21290          | -0.06267          | 4.087      | 57.16 | 1453.62 | 830.87 | -0.69 | -0.21175          | -0.06484          | 3.997      | 57.16 | 1442.35 | 813.62 | -0.57 |
| 23       | -0.21959          | -0.05576          | 4.458      | 54.46 | 1407.10 | 819.32 | -0.49 | -0.22012          | -0.05773          | 4.418      | 54.46 | 1398.13 | 814.12 | -0.45 |
| 24       | -0.22323          | -0.05490          | 4.580      | 57.35 | 1471.03 | 844.79 | 0.44  | -0.22128          | -0.05725          | 4.463      | 57.35 | 1458.37 | 823.78 | 0.54  |
| 25       | -0.21913          | -0.06272          | 4.256      | 51.52 | 1382.73 | 776.96 | -1.63 | -0.21800          | -0.06469          | 4.171      | 51.52 | 1320.98 | 772.66 | -1.58 |
| 26       | -0.21823          | -0.06155          | 4.263      | 54.41 | 1394.16 | 802.35 | -0.70 | -0.21697          | -0.06408          | 4.160      | 54.41 | 1382.42 | 787.00 | -0.60 |
| 27       | -0.21776          | -0.06161          | 4.249      | 53.35 | 1374.00 | 793.67 | -0.73 | -0.21674          | -0.06374          | 4.163      | 53.35 | 1365.38 | 786.21 | -0.66 |
| 28       | -0.21881          | -0.06196          | 4.268      | 57.02 | 1482.83 | 863.67 | -0.37 | -0.21732          | -0.06383          | 4.176      | 57.02 | 1473.91 | 857.74 | -0.34 |

|    |          |          |       |       |         |        |       |          |          |       |       |         |        |       |
|----|----------|----------|-------|-------|---------|--------|-------|----------|----------|-------|-------|---------|--------|-------|
| 29 | -0.21736 | -0.06118 | 4.249 | 58.57 | 1508.80 | 863.41 | 0.69  | -0.21624 | -0.06370 | 4.150 | 58.57 | 1491.48 | 849.22 | 0.67  |
| 30 | -0.21718 | -0.06109 | 4.247 | 57.02 | 1480.63 | 858.20 | 0.10  | -0.21611 | -0.06317 | 4.161 | 57.02 | 1471.12 | 848.42 | 0.18  |
| 31 | -0.22015 | -0.05842 | 4.401 | 54.61 | 1453.88 | 858.47 | 0.39  | -0.21793 | -0.06070 | 4.278 | 54.61 | 1445.83 | 848.70 | 0.40  |
| 32 | -0.22012 | -0.05837 | 4.401 | 58.28 | 1564.05 | 919.08 | -1.15 | -0.21791 | -0.06064 | 4.279 | 58.28 | 1556.97 | 908.44 | -1.17 |
| 33 | -0.21988 | -0.05813 | 4.401 | 57.51 | 1505.29 | 872.99 | -0.56 | -0.21758 | -0.06030 | 4.279 | 57.51 | 1494.53 | 866.15 | 0.59  |
| 34 | -0.21901 | -0.06201 | 4.272 | 57.02 | 1468.01 | 844.29 | -0.47 | -0.21747 | -0.06399 | 4.176 | 57.02 | 1461.75 | 838.96 | -0.44 |
| 35 | -0.21759 | -0.06122 | 4.255 | 58.57 | 1496.48 | 850.57 | -0.59 | -0.21681 | -0.06423 | 4.152 | 58.57 | 1469.46 | 819.37 | 0.56  |
| 36 | -0.21959 | -0.06305 | 4.259 | 54.41 | 1400.69 | 811.58 | -1.34 | -0.21823 | -0.06484 | 4.174 | 54.41 | 1392.05 | 802.48 | -1.31 |
| 37 | -0.21832 | -0.06246 | 4.241 | 55.96 | 1425.49 | 814.09 | -0.29 | -0.21717 | -0.06472 | 4.148 | 55.96 | 1412.76 | 801.23 | -0.30 |
| 38 | -0.21635 | -0.06074 | 4.234 | 56.25 | 1454.86 | 849.00 | -0.97 | -0.21504 | -0.06276 | 4.143 | 56.25 | 1446.25 | 843.36 | -0.93 |
| 39 | -0.21633 | -0.06082 | 4.231 | 59.14 | 1509.15 | 864.75 | -0.28 | -0.21513 | -0.06334 | 4.130 | 59.14 | 1498.01 | 849.52 | -0.18 |
| 40 | -0.21663 | -0.06052 | 4.248 | 58.08 | 1495.31 | 865.04 | -0.78 | -0.21533 | -0.06254 | 4.157 | 58.08 | 1487.32 | 862.44 | -0.75 |
| 41 | -0.21658 | -0.06061 | 4.244 | 60.98 | 1552.72 | 886.83 | -0.10 | -0.21538 | -0.06312 | 4.197 | 60.98 | 1539.03 | 872.63 | 0.0   |
| 42 | -0.22090 | -0.06372 | 4.277 | 59.34 | 1500.48 | 875.62 | -3.74 | -0.21976 | -0.06551 | 4.197 | 59.34 | 1494.19 | 868.34 | -3.70 |
| 43 | -0.22148 | -0.06734 | 4.194 | 52.15 | 1355.43 | 793.94 | -3.97 | -0.22193 | -0.06891 | 4.164 | 52.15 | 1350.92 | 787.54 | -3.92 |
| 44 | -0.22137 | -0.06699 | 4.201 | 53.99 | 1414.60 | 829.97 | -3.16 | -0.22180 | -0.06860 | 4.168 | 53.99 | 1407.82 | 822.27 | -3.11 |
| 45 | -0.22119 | -0.06647 | 4.210 | 55.82 | 1462.80 | 856.03 | -2.57 | -0.22152 | -0.06812 | 4.174 | 55.82 | 1455.33 | 847.63 | -2.52 |
| 46 | -0.22107 | -0.06516 | 4.242 | 53.54 | 1469.54 | 853.44 | -3.29 | -0.22084 | -0.06703 | 4.185 | 53.54 | 1460.57 | 850.07 | -3.25 |
| 47 | -0.21966 | -0.06551 | 4.194 | 54.70 | 1412.65 | 818.62 | -1.89 | -0.21878 | -0.06733 | 4.121 | 54.70 | 1404.01 | 809.65 | -1.85 |
| 48 | -0.22266 | -0.07083 | 4.131 | 59.98 | 1523.19 | 887.61 | -6.10 | -0.22323 | -0.07230 | 4.107 | 59.98 | 1514.85 | 881.82 | -6.05 |



**Table S6:** Drug-likeness parameters and lipophilicity indices for the 5-thiophen-2-yl pyrazole derivatives under study. See text for the definition of these parameters and their description. \* and # denote the selected compounds for external validation (test sets). \* (#) for the model using B3LYP/6-311G(d, p) (B3LYP+D3/6-311G(d, p)) optimized structures.

| Comp. | log <sub>10</sub> P | MW    | HBA | HBD | TPSA  | N <sub>atom</sub> | MR     | N <sub>brot</sub> | Lipinski Score | Ghose Score | Veber Score | N <sub>H</sub> | LE    | LLE   | ABS % |
|-------|---------------------|-------|-----|-----|-------|-------------------|--------|-------------------|----------------|-------------|-------------|----------------|-------|-------|-------|
| 6     | 4.79                | 514.3 | 5   | 1   | 50.16 | 48                | 118.27 | 4                 | 3              | 3           | 2           | 29             | 0.359 | 2.656 | 91.69 |
| 7     | 5.18                | 528.3 | 5   | 1   | 50.16 | 52                | 122.88 | 4                 | 2              | 2           | 2           | 30             | 0.345 | 1.21  | 91.69 |
| 8     | 4.49                | 469.8 | 5   | 1   | 50.16 | 48                | 115.68 | 4                 | 4              | 4           | 2           | 29             | 0.352 | 2.809 | 91.69 |
| 9     | 4.88                | 483.8 | 5   | 1   | 50.16 | 51                | 120.28 | 4                 | 4              | 3           | 2           | 30             | 0.317 | 1.919 | 91.69 |
| 12#   | 5.50                | 501.5 | 5   | 1   | 50.16 | 59                | 133.37 | 5                 | 2              | 2           | 2           | 33             | 0.333 | 2.357 | 91.69 |
| 13    | 5.80                | 527.5 | 5   | 1   | 50.16 | 63                | 140.51 | 5                 | 2              | 1           | 2           | 35             | 0.324 | 2.302 | 91.69 |
| 14*   | 5.90                | 515.5 | 5   | 1   | 50.16 | 62                | 137.97 | 5                 | 2              | 1           | 2           | 34             | 0.336 | 2.255 | 91.69 |
| 15    | 5.83                | 515.5 | 5   | 1   | 50.16 | 62                | 137.91 | 5                 | 2              | 1           | 2           | 34             | 0.356 | 2.808 | 91.69 |
| 16*   | 6.23                | 529.5 | 5   | 1   | 50.16 | 65                | 142.52 | 5                 | 2              | 1           | 2           | 35             | 0.332 | 2.08  | 91.69 |
| 18    | 5.90                | 515.5 | 5   | 1   | 50.16 | 62                | 137.97 | 6                 | 2              | 1           | 2           | 34             | 0.338 | 2.315 | 91.69 |
| 19    | 6.29                | 529.5 | 5   | 1   | 50.16 | 65                | 142.57 | 6                 | 2              | 1           | 2           | 35             | 0.322 | 1.761 | 91.69 |
| 20*   | 6.23                | 529.5 | 5   | 1   | 50.16 | 65                | 142.52 | 6                 | 2              | 1           | 2           | 35             | 0.332 | 2.062 | 91.69 |
| 21    | 6.29                | 529.5 | 5   | 1   | 50.16 | 65                | 142.57 | 7                 | 2              | 1           | 2           | 33             | 0.325 | 1.376 | 91.69 |
| 22    | 5.22                | 529.5 | 5   | 1   | 50.16 | 65                | 142.99 | 7                 | 2              | 2           | 2           | 35             | 0.302 | 2.341 | 91.69 |
| 23    | 5.03                | 505.5 | 5   | 1   | 50.16 | 63                | 134.89 | 8                 | 2              | 2           | 2           | 33             | 0.307 | 2.207 | 91.69 |
| 24#   | 5.33                | 531.5 | 5   | 1   | 50.16 | 67                | 142.03 | 8                 | 2              | 2           | 2           | 35             | 0.307 | 2.356 | 91.69 |
| 25    | 5.10                | 487.5 | 5   | 1   | 50.16 | 56                | 128.76 | 4                 | 3              | 3           | 2           | 32             | 0.314 | 2.084 | 91.69 |
| 26    | 5.40                | 513.5 | 5   | 1   | 50.16 | 60                | 135.91 | 4                 | 2              | 2           | 2           | 34             | 0.311 | 2.148 | 91.69 |
| 27*   | 5.50                | 501.5 | 5   | 1   | 50.16 | 59                | 133.37 | 4                 | 2              | 2           | 2           | 33             | 0.323 | 2.116 | 91.69 |
| 28    | 6.29                | 529.5 | 5   | 1   | 50.16 | 65                | 142.57 | 6                 | 2              | 1           | 2           | 34             | 0.365 | 2.564 | 91.69 |

|      |      |       |   |   |       |    |        |    |   |   |   |    |       |       |       |
|------|------|-------|---|---|-------|----|--------|----|---|---|---|----|-------|-------|-------|
| 29*# | 7.05 | 540.6 | 5 | 1 | 50.16 | 67 | 145.94 | 6  | 2 | 1 | 2 | 36 | 0.346 | 1.836 | 91.69 |
| 30   | 6.29 | 529.5 | 5 | 1 | 50.16 | 65 | 142.57 | 6  | 2 | 1 | 2 | 35 | 0.351 | 2.48  | 91.69 |
| 31   | 6.91 | 502.5 | 4 | 1 | 46.92 | 62 | 136.10 | 8  | 2 | 1 | 2 | 32 | 0.373 | 1.613 | 92.81 |
| 32   | 7.70 | 530.6 | 4 | 1 | 46.92 | 68 | 145.30 | 10 | 2 | 1 | 1 | 34 | 0.354 | 0.885 | 92.81 |
| 33#  | 7.29 | 528.5 | 4 | 1 | 46.92 | 66 | 143.24 | 6  | 2 | 1 | 2 | 34 | 0.357 | 1.388 | 92.81 |
| 34#  | 6.26 | 529.5 | 5 | 1 | 50.16 | 65 | 142.39 | 4  | 2 | 1 | 2 | 34 | 0.308 | 1.225 | 91.69 |
| 35   | 7.02 | 540.6 | 5 | 1 | 50.16 | 67 | 145.76 | 4  | 2 | 1 | 2 | 36 | 0.298 | 0.644 | 91.69 |
| 36   | 5.33 | 513.5 | 5 | 1 | 50.16 | 60 | 136.11 | 4  | 2 | 2 | 2 | 33 | 0.306 | 1.889 | 91.69 |
| 37   | 6.08 | 524.5 | 5 | 1 | 50.16 | 62 | 139.48 | 4  | 2 | 1 | 2 | 35 | 0.307 | 1.598 | 91.69 |
| 38   | 5.72 | 527.5 | 5 | 1 | 50.16 | 63 | 140.71 | 4  | 2 | 1 | 2 | 35 | 0.326 | 2.429 | 91.69 |
| 39   | 6.02 | 553.6 | 5 | 1 | 50.16 | 67 | 147.85 | 4  | 2 | 1 | 2 | 37 | 0.302 | 1.959 | 91.69 |
| 40   | 6.12 | 541.5 | 5 | 1 | 50.16 | 66 | 145.31 | 4  | 2 | 1 | 2 | 36 | 0.316 | 2.017 | 91.69 |
| 41*  | 6.42 | 567.6 | 5 | 1 | 50.16 | 70 | 152.46 | 4  | 2 | 1 | 2 | 38 | 0.299 | 1.688 | 91.69 |
| 42#  | 6.32 | 549.5 | 5 | 1 | 50.16 | 63 | 148.86 | 6  | 2 | 1 | 2 | 38 | 0.303 | 1.895 | 91.69 |
| 43*# | 3.98 | 503.5 | 6 | 1 | 59.40 | 57 | 130.69 | 5  | 3 | 2 | 2 | 33 | 0.305 | 3.205 | 88.51 |
| 44   | 4.33 | 517.5 | 6 | 1 | 59.40 | 60 | 135.44 | 6  | 3 | 2 | 2 | 34 | 0.325 | 3.566 | 88.51 |
| 45*# | 4.74 | 531.5 | 6 | 1 | 59.40 | 63 | 139.89 | 6  | 3 | 2 | 2 | 35 | 0.305 | 2.895 | 88.51 |
| 46   | 4.52 | 530.5 | 6 | 1 | 62.53 | 64 | 141.54 | 5  | 3 | 2 | 2 | 35 | 0.283 | 2.564 | 87.43 |
| 47#  | 4.13 | 516.5 | 6 | 1 | 53.04 | 61 | 137.67 | 6  | 3 | 2 | 2 | 34 | 0.284 | 2.776 | 90.70 |
| 48   | 5.76 | 565.5 | 6 | 1 | 59.40 | 64 | 150.20 | 6  | 2 | 1 | 2 | 38 | 0.271 | 1.607 | 88.51 |

**Table S7:** Cartesian coordinates of compounds 6 - 48 (in angstroms) calculated using the B3LYP/6-311 g(d,p) approach with and without considering the dispersion correction (D3).

| <b>B3LYP/6-311G(d, p)</b> |             |             |             | <b>B3LYP+D3/6-311G(d, p)</b> |             |             |             |
|---------------------------|-------------|-------------|-------------|------------------------------|-------------|-------------|-------------|
| 6                         |             |             |             |                              |             |             |             |
| C                         | 2.21895800  | 3.10452800  | 0.94563600  | C                            | 2.38690000  | 2.92390000  | 0.95360000  |
| C                         | 1.41259400  | 1.97613800  | 1.06166400  | C                            | 1.52320000  | 1.83830000  | 1.05830000  |
| C                         | 0.68792900  | 1.50468400  | -0.03841200 | C                            | 0.69140000  | 1.48940000  | -0.01140000 |
| C                         | 0.75275100  | 2.20552500  | -1.24263300 | C                            | 0.70830000  | 2.26640000  | -1.16890000 |
| C                         | 1.54043200  | 3.34125400  | -1.37023700 | C                            | 1.55190000  | 3.36240000  | -1.28170000 |
| C                         | 2.27565400  | 3.77337500  | -0.27089400 | C                            | 2.39360000  | 3.67230000  | -0.21730000 |
| H                         | 2.77937000  | 3.45996500  | 1.79859100  | H                            | 3.03320000  | 3.18420000  | 1.77960000  |
| H                         | 0.17122600  | 1.84348500  | -2.08096400 | H                            | 0.04710000  | 1.99120000  | -1.98040000 |
| H                         | 1.58981600  | 3.87926400  | -2.30712600 | H                            | 1.56720000  | 3.96150000  | -2.18180000 |
| N                         | -0.15171600 | 0.35702200  | 0.04451100  | N                            | -0.18130000 | 0.36940000  | 0.04870000  |
| C                         | 0.19707500  | -0.97222600 | 0.20552500  | C                            | 0.14120000  | -0.97140000 | 0.14970000  |
| C                         | -0.99215200 | -1.69191500 | 0.21615100  | C                            | -1.06270000 | -1.66520000 | 0.14030000  |
| C                         | -1.99771800 | -0.70431500 | 0.05281500  | C                            | -2.04830000 | -0.65150000 | 0.02570000  |
| C                         | -3.47550000 | -0.91847000 | -0.01275100 | C                            | -3.52800000 | -0.83860000 | -0.03470000 |
| O                         | -3.97089100 | -2.03407500 | 0.07310400  | O                            | -4.04140000 | -1.94880000 | 0.01480000  |
| N                         | -4.19050800 | 0.23196000  | -0.17667200 | N                            | -4.22960000 | 0.32510000  | -0.15070000 |
| C                         | 1.56665900  | -1.45489500 | 0.30090900  | C                            | 1.49810000  | -1.48230000 | 0.21720000  |
| C                         | 2.05976000  | -2.38579000 | 1.18001200  | C                            | 1.94890000  | -2.51960000 | 0.99430000  |
| S                         | 2.81523700  | -0.96908300 | -0.83756500 | S                            | 2.79370000  | -0.86250000 | -0.79620000 |
| C                         | 3.42786900  | -2.71341100 | 0.97194700  | C                            | 3.32380000  | -2.82740000 | 0.80620000  |
| H                         | 1.45946300  | -2.81083700 | 1.97273900  | H                            | 1.31180000  | -3.03110000 | 1.70210000  |
| C                         | 3.96412600  | -2.02534800 | -0.07641800 | C                            | 3.90670000  | -2.01590000 | -0.12310000 |
| H                         | 3.98801000  | -3.41290100 | 1.57578400  | H                            | 3.85910000  | -3.59920000 | 1.34000000  |
| Cl                        | 1.30161000  | 1.19046300  | 2.61629300  | Cl                           | 1.49160000  | 0.93900000  | 2.55350000  |
| Cl                        | 3.28798400  | 5.19717600  | -0.41226800 | Cl                           | 3.48220000  | 5.04040000  | -0.34550000 |
| H                         | -3.68833200 | 1.10718300  | -0.22432400 | H                            | -3.72420000 | 1.19910000  | -0.16860000 |
| N                         | -1.48251100 | 0.51880900  | -0.05752600 | N                            | -1.50880000 | 0.56530000  | -0.03890000 |
| Br                        | 5.74567800  | -2.11269900 | -0.69867700 | Br                           | 5.71630000  | -2.03960000 | -0.66810000 |
| C                         | -6.12733600 | -0.35231700 | -1.46205600 | C                            | -6.17410000 | -0.21780000 | -1.43240000 |
| C                         | -6.26434900 | -0.09722600 | 0.98060900  | C                            | -6.28310000 | -0.05140000 | 1.01760000  |
| C                         | -7.61056700 | -0.00613600 | -1.61153900 | C                            | -7.66290000 | 0.11410000  | -1.55050000 |
| H                         | -5.99410200 | -1.44187300 | -1.40412900 | H                            | -6.02700000 | -1.30650000 | -1.40780000 |
| H                         | -5.55987400 | 0.01154100  | -2.32199500 | H                            | -5.62020000 | 0.17980000  | -2.28610000 |

|   |             |             |             |   |             |             |             |
|---|-------------|-------------|-------------|---|-------------|-------------|-------------|
| C | -7.75082800 | 0.25527300  | 0.89045600  | C | -7.77440000 | 0.28450000  | 0.95770000  |
| H | -6.13795300 | -1.17370500 | 1.16339800  | H | -6.14070000 | -1.13260000 | 1.15320000  |
| H | -5.79131800 | 0.44261800  | 1.80437100  | H | -5.80440000 | 0.46110000  | 1.85530000  |
| C | -8.39373000 | -0.38297900 | -0.34747900 | C | -8.42100000 | -0.32660000 | -0.29190000 |
| H | -8.01426200 | -0.52587300 | -2.48624600 | H | -8.07110000 | -0.37440000 | -2.44080000 |
| H | -7.70789700 | 1.06948300  | -1.79675000 | H | -7.77670000 | 1.19540000  | -1.68680000 |
| H | -8.25481300 | -0.07755300 | 1.80335400  | H | -8.26260000 | -0.08180000 | 1.86620000  |
| H | -7.85548400 | 1.34477300  | 0.83812500  | H | -7.89330000 | 1.37360000  | 0.93630000  |
| H | -9.43965500 | -0.07430800 | -0.43842100 | H | -9.47530000 | -0.04130000 | -0.35820000 |
| H | -8.39386200 | -1.47424100 | -0.23350800 | H | -8.38960000 | -1.42080000 | -0.21620000 |
| N | -5.58702400 | 0.31388800  | -0.26303300 | N | -5.62630000 | 0.41540000  | -0.21820000 |
| C | -1.16209400 | -3.17481200 | 0.32863500  | C | -1.26070000 | -3.14680000 | 0.19470000  |
| H | -1.43896600 | -3.46514700 | 1.34702200  | H | -1.47500000 | -3.47750000 | 1.21600000  |
| H | -1.96853900 | -3.51517000 | -0.31915600 | H | -2.11680000 | -3.43560000 | -0.41230000 |
| H | -0.23617500 | -3.69156900 | 0.06812400  | H | -0.36490000 | -3.66810000 | -0.14970000 |
| 7 |             |             |             |   |             |             |             |
| C | 1.60805200  | 3.08965900  | 1.08206000  | C | 1.77370000  | 2.94220000  | 1.07940000  |
| C | 1.05750600  | 1.81344200  | 1.15462700  | C | 1.16930000  | 1.69130000  | 1.15380000  |
| C | 0.43674200  | 1.24247200  | 0.03816800  | C | 0.41270000  | 1.20490000  | 0.08180000  |
| C | 0.34134800  | 1.98728900  | -1.13743600 | C | 0.23750000  | 2.00580000  | -1.04610000 |
| C | 0.87176200  | 3.26724000  | -1.22138000 | C | 0.81950000  | 3.26280000  | -1.12810000 |
| C | 1.51082200  | 3.80167700  | -0.10703800 | C | 1.59410000  | 3.71310000  | -0.06290000 |
| H | 2.09028500  | 3.52173800  | 1.94733200  | H | 2.36380000  | 3.30940000  | 1.90680000  |
| H | -0.15866300 | 1.54314800  | -1.98877600 | H | -0.36310000 | 1.61990000  | -1.85970000 |
| H | 0.79842600  | 3.83892800  | -2.13652300 | H | 0.68670000  | 3.88060000  | -2.00560000 |
| N | -0.14178500 | -0.05811500 | 0.07670500  | N | -0.19520000 | -0.07870000 | 0.11100000  |
| C | 0.47954700  | -1.28974200 | 0.18331000  | C | 0.40940000  | -1.32130000 | 0.15690000  |
| C | -0.53190900 | -2.24300000 | 0.16660600  | C | -0.61730000 | -2.25750000 | 0.13280000  |
| C | -1.72479300 | -1.48406000 | 0.04554300  | C | -1.80060000 | -1.47780000 | 0.06890000  |
| C | -3.12513600 | -2.00781200 | -0.02393900 | C | -3.20900000 | -1.97770000 | 0.01080000  |
| O | -3.36548800 | -3.20018400 | 0.01180700  | O | -3.46840000 | -3.16510000 | -0.05540000 |
| N | -4.06594800 | -1.01551200 | -0.12799300 | N | -4.13380000 | -0.96760000 | 0.03670000  |
| C | 1.92078500  | -1.47683200 | 0.25826300  | C | 1.84540000  | -1.52920000 | 0.19130000  |
| C | 2.60635500  | -2.31825500 | 1.09760600  | C | 2.52320000  | -2.47230000 | 0.92220000  |
| S | 3.02974700  | -0.69157600 | -0.85762300 | S | 2.95870000  | -0.60680000 | -0.80860000 |
| C | 4.01114700  | -2.34049800 | 0.87734100  | C | 3.92860000  | -2.46840000 | 0.70900000  |
| H | 2.11554100  | -2.89312900 | 1.87093500  | H | 2.02410000  | -3.13550000 | 1.61470000  |

|    |             |             |             |    |             |             |             |
|----|-------------|-------------|-------------|----|-------------|-------------|-------------|
| C  | 4.38177500  | -1.51168000 | -0.14030700 | C  | 4.30610000  | -1.51630000 | -0.19260000 |
| H  | 4.71106700  | -2.93036900 | 1.45166000  | H  | 4.62710000  | -3.12550000 | 1.20640000  |
| Cl | 1.12991100  | 0.96275600  | 2.67700100  | Cl | 1.36270000  | 0.75740000  | 2.61520000  |
| Cl | 2.20046800  | 5.41094000  | -0.19374000 | Cl | 2.35570000  | 5.28970000  | -0.15290000 |
| H  | -3.73738000 | -0.05532400 | -0.13418400 | H  | -3.78710000 | -0.01390000 | 0.03440000  |
| N  | -1.47877700 | -0.17661200 | -0.01619800 | N  | -1.53590000 | -0.17180000 | 0.04480000  |
| C  | -0.38577700 | -3.73175000 | 0.21821500  | C  | -0.49250000 | -3.74800000 | 0.13050000  |
| H  | -0.59137100 | -4.11463900 | 1.22278000  | H  | -0.62150000 | -4.15500000 | 1.13860000  |
| H  | -1.10638600 | -4.20703900 | -0.44553500 | H  | -1.27310000 | -4.18960000 | -0.48620000 |
| H  | 0.62682100  | -4.03154200 | -0.05936400 | H  | 0.49090000  | -4.05230000 | -0.23480000 |
| C  | -6.19198400 | -0.96069600 | 0.98903300  | C  | -6.29190000 | -0.77170000 | 1.04020000  |
| C  | -6.03014400 | -0.99280900 | -1.49742200 | C  | -6.01560000 | -0.93270000 | -1.43200000 |
| C  | -6.36870400 | 0.53207300  | 1.31124700  | C  | -6.37250000 | 0.74480000  | 1.27800000  |
| H  | -7.17703700 | -1.42160900 | 0.85854200  | H  | -7.30060000 | -1.16750000 | 0.88210000  |
| H  | -5.71889700 | -1.46712600 | 1.83469900  | H  | -5.89350000 | -1.26520000 | 1.93090000  |
| C  | -5.88919500 | 0.44961300  | -2.03714400 | C  | -5.70520000 | 0.45760000  | -2.02800000 |
| H  | -7.08888500 | -1.24360200 | -1.39052200 | H  | -7.09700000 | -1.07700000 | -1.36750000 |
| H  | -5.62197300 | -1.68601500 | -2.23985700 | H  | -5.63830000 | -1.70130000 | -2.11390000 |
| C  | -6.96272700 | 1.38194300  | 0.17556400  | C  | -6.84050000 | 1.56710000  | 0.06540000  |
| H  | -5.40250000 | 0.96179500  | 1.60502600  | H  | -5.39220000 | 1.11770000  | 1.60100000  |
| H  | -7.00997300 | 0.60336000  | 2.19796800  | H  | -7.05110000 | 0.91210000  | 2.12260000  |
| C  | -6.00118000 | 1.59638200  | -1.00798500 | C  | -5.79500000 | 1.65990000  | -1.06170000 |
| H  | -6.65940100 | 0.57335400  | -2.80725300 | H  | -6.39790000 | 0.60550000  | -2.86410000 |
| H  | -4.93180800 | 0.54873400  | -2.55913200 | H  | -4.70320000 | 0.44290000  | -2.46870000 |
| H  | -7.90647500 | 0.94240400  | -0.17249100 | H  | -7.78360000 | 1.16170000  | -0.32280000 |
| H  | -7.22327700 | 2.36321200  | 0.58579500  | H  | -7.06680000 | 2.58200000  | 0.40780000  |
| H  | -6.29269600 | 2.50280800  | -1.54820000 | H  | -5.98710000 | 2.55720000  | -1.65820000 |
| H  | -5.00843700 | 1.81730900  | -0.59523800 | H  | -4.81570000 | 1.83160000  | -0.59680000 |
| Br | 6.13690900  | -1.19429900 | -0.76328700 | Br | 6.06830000  | -1.12810000 | -0.75510000 |
| N  | -5.42106900 | -1.30404900 | -0.20681800 | N  | -5.49150000 | -1.22240000 | -0.09730000 |
| 8  |             |             |             |    |             |             |             |
| C  | 2.92512700  | 2.66189600  | 0.93921600  | C  | 3.05320000  | 2.50260000  | 0.93800000  |
| C  | 2.02581100  | 1.60369500  | 1.03065000  | C  | 2.10770000  | 1.48550000  | 1.02210000  |
| C  | 1.23649700  | 1.24534300  | -0.06759600 | C  | 1.23080000  | 1.24400000  | -0.04120000 |
| C  | 1.33400400  | 1.98964800  | -1.24324400 | C  | 1.28830000  | 2.06000000  | -1.17020000 |
| C  | 2.21518700  | 3.05719900  | -1.34544300 | C  | 2.21440000  | 3.08920000  | -1.26170000 |
| C  | 3.01142600  | 3.37562900  | -0.24977500 | C  | 3.09770000  | 3.29160000  | -0.20520000 |

|    |             |             |             |    |             |             |             |
|----|-------------|-------------|-------------|----|-------------|-------------|-------------|
| H  | 3.53476700  | 2.92991500  | 1.79035700  | H  | 3.73330000  | 2.67990000  | 1.75880000  |
| H  | 0.70314500  | 1.71620500  | -2.07947600 | H  | 0.59210000  | 1.86860000  | -1.97670000 |
| H  | 2.28937700  | 3.62917600  | -2.26032000 | H  | 2.26070000  | 3.71870000  | -2.13990000 |
| N  | 0.30160300  | 0.17223900  | -0.00933900 | N  | 0.27210000  | 0.19580000  | -0.00190000 |
| C  | 0.53600800  | -1.18816500 | 0.08465500  | C  | 0.48750000  | -1.16940000 | 0.04170000  |
| C  | -0.71130800 | -1.80187900 | 0.09522900  | C  | -0.76840000 | -1.76400000 | 0.03540000  |
| C  | -1.62975900 | -0.72448100 | 0.00108800  | C  | -1.67120000 | -0.67120000 | -0.01810000 |
| C  | -3.12185900 | -0.80616400 | -0.03494300 | C  | -3.16220000 | -0.73690000 | -0.05040000 |
| O  | -3.71155100 | -1.87727800 | 0.01316600  | O  | -3.76260000 | -1.80340000 | -0.03150000 |
| N  | -3.73621700 | 0.40854500  | -0.12698400 | N  | -3.76950000 | 0.48300000  | -0.10460000 |
| C  | 1.85940900  | -1.79163200 | 0.12493600  | C  | 1.79980000  | -1.78920000 | 0.05860000  |
| C  | 2.28428100  | -2.80737600 | 0.94330200  | C  | 2.18070000  | -2.88970000 | 0.78400000  |
| S  | 3.12524300  | -1.35294600 | -1.01450500 | S  | 3.11940000  | -1.23350000 | -0.96190000 |
| C  | 3.61453300  | -3.24057600 | 0.68928000  | C  | 3.52140000  | -3.30010000 | 0.55110000  |
| H  | 1.66250200  | -3.22056600 | 1.72549100  | H  | 1.51870000  | -3.37590000 | 1.48660000  |
| C  | 4.18924100  | -2.54566700 | -0.33241100 | C  | 4.14700000  | -2.50130000 | -0.35950000 |
| H  | 4.12457300  | -4.01673600 | 1.24163000  | H  | 4.00580000  | -4.13310000 | 1.03960000  |
| Cl | 1.88392800  | 0.76277700  | 2.55352500  | Cl | 2.03210000  | 0.53560000  | 2.48410000  |
| Cl | 4.14131900  | 4.71092700  | -0.35999600 | Cl | 4.28910000  | 4.57340000  | -0.30730000 |
| H  | -3.16009600 | 1.23805700  | -0.14872100 | H  | -3.19550000 | 1.31380000  | -0.10130000 |
| N  | -1.01185500 | 0.45311500  | -0.06989700 | N  | -1.03680000 | 0.50020000  | -0.05060000 |
| C  | -5.74432000 | 0.05675900  | -1.38745300 | C  | -5.77660000 | 0.14950000  | -1.36120000 |
| C  | -5.80541300 | 0.20611500  | 1.06710600  | C  | -5.82310000 | 0.22570000  | 1.09530000  |
| C  | -7.19420300 | 0.53730800  | -1.48276700 | C  | -7.23570000 | 0.60370000  | -1.43220000 |
| H  | -5.70637000 | -1.04177500 | -1.38271400 | H  | -5.71730000 | -0.94770000 | -1.38190000 |
| H  | -5.16577300 | 0.41049700  | -2.24422500 | H  | -5.20940000 | 0.53550000  | -2.21150000 |
| C  | -7.25668700 | 0.69034400  | 1.03126900  | C  | -7.28330000 | 0.68180000  | 1.08250000  |
| H  | -5.77032100 | -0.88475700 | 1.19737200  | H  | -5.76590000 | -0.86790000 | 1.18620000  |
| H  | -5.26898200 | 0.66299100  | 1.90213700  | H  | -5.28810000 | 0.66460000  | 1.94080000  |
| C  | -7.97985400 | 0.16999700  | -0.21747500 | C  | -8.00180000 | 0.17470000  | -0.17440000 |
| H  | -7.66092100 | 0.09698800  | -2.36961400 | H  | -7.69960000 | 0.18550000  | -2.33100000 |
| H  | -7.20043300 | 1.62492700  | -1.61603500 | H  | -7.26460000 | 1.69520000  | -1.52420000 |
| H  | -7.76817900 | 0.35955400  | 1.94072600  | H  | -7.78140000 | 0.31980000  | 1.98730000  |
| H  | -7.26611000 | 1.78606500  | 1.03124900  | H  | -7.31430000 | 1.77690000  | 1.10550000  |
| H  | -8.99632200 | 0.57227200  | -0.26726900 | H  | -9.03070000 | 0.54560000  | -0.20540000 |
| H  | -8.07346800 | -0.92132700 | -0.15341900 | H  | -8.05710000 | -0.92060000 | -0.14140000 |
| N  | -5.12161900 | 0.61556000  | -0.17357100 | N  | -5.15540000 | 0.68760000  | -0.13650000 |

|    |             |             |             |    |             |             |             |
|----|-------------|-------------|-------------|----|-------------|-------------|-------------|
| C  | -1.00831700 | -3.26807100 | 0.14748000  | C  | -1.08400000 | -3.22610000 | 0.03950000  |
| H  | -1.27945500 | -3.58116400 | 1.16069300  | H  | -1.30040000 | -3.57890000 | 1.05300000  |
| H  | -1.86038600 | -3.50577100 | -0.48749000 | H  | -1.97440000 | -3.42160000 | -0.55520000 |
| H  | -0.13973000 | -3.85052500 | -0.16656000 | H  | -0.24130000 | -3.80320000 | -0.34760000 |
| Cl | 5.79760600  | -2.73278800 | -0.94571500 | Cl | 5.78540000  | -2.63380000 | -0.90550000 |
| 9  |             |             |             |    |             |             |             |
| C  | 2.27317200  | 2.84748800  | 1.02619200  | C  | 2.39210000  | 2.71620000  | 1.00170000  |
| C  | 1.64604600  | 1.60652000  | 1.08766200  | C  | 1.72050000  | 1.49910000  | 1.06060000  |
| C  | 0.95992300  | 1.10100000  | -0.02208700 | C  | 0.92740000  | 1.07480000  | -0.01130000 |
| C  | 0.87885000  | 1.87705500  | -1.17841000 | C  | 0.78560000  | 1.90440000  | -1.12310000 |
| C  | 1.48585600  | 3.12326300  | -1.25057700 | C  | 1.43520000  | 3.12880000  | -1.18920000 |
| C  | 2.18769800  | 3.59136600  | -0.14418700 | C  | 2.24370000  | 3.51660000  | -0.12460000 |
| H  | 2.80533800  | 3.22885300  | 1.88602100  | H  | 3.00980000  | 3.03520000  | 1.82900000  |
| H  | 0.32859200  | 1.48442100  | -2.02404900 | H  | 0.15670000  | 1.56690000  | -1.93680000 |
| H  | 1.42309700  | 3.71930800  | -2.15084600 | H  | 1.32790000  | 3.76890000  | -2.05420000 |
| N  | 0.30227200  | -0.16169900 | 0.00580700  | N  | 0.24900000  | -0.17310000 | 0.00200000  |
| C  | 0.84804300  | -1.43165500 | 0.06551500  | C  | 0.78310000  | -1.44830000 | 0.01950000  |
| C  | -0.22117200 | -2.31978700 | 0.05747100  | C  | -0.29480000 | -2.32480000 | -0.01090000 |
| C  | -1.36717000 | -1.48567300 | -0.01061200 | C  | -1.43280000 | -1.47900000 | -0.05010000 |
| C  | -2.79896200 | -1.91977500 | -0.05093200 | C  | -2.86750000 | -1.89920000 | -0.09980000 |
| O  | -3.11230400 | -3.09557500 | -0.03889300 | O  | -3.19360000 | -3.07120000 | -0.13310000 |
| N  | -3.67862300 | -0.86886600 | -0.10020400 | N  | -3.73290000 | -0.83770000 | -0.10200000 |
| C  | 2.27612600  | -1.70957200 | 0.09335200  | C  | 2.20510000  | -1.73820000 | 0.03510000  |
| C  | 2.93068700  | -2.61572400 | 0.88847900  | C  | 2.83400000  | -2.73480000 | 0.73750000  |
| S  | 3.39902800  | -0.96139700 | -1.03481500 | S  | 3.35910000  | -0.85820000 | -0.95800000 |
| C  | 4.32426900  | -2.71977900 | 0.62563700  | C  | 4.23500000  | -2.80830000 | 0.50860000  |
| H  | 2.42626500  | -3.18061000 | 1.66024300  | H  | 2.30370000  | -3.38290000 | 1.42080000  |
| C  | 4.71576500  | -1.88692800 | -0.37935700 | C  | 4.65640000  | -1.86040000 | -0.37580000 |
| H  | 5.00423300  | -3.36738200 | 1.16036600  | H  | 4.90160000  | -3.51470000 | 0.98180000  |
| Cl | 1.70764500  | 0.71781500  | 2.58863100  | Cl | 1.87750000  | 0.52880000  | 2.50250000  |
| Cl | 2.97397400  | 5.15632900  | -0.21674100 | Cl | 3.08950000  | 5.05070000  | -0.19480000 |
| H  | -3.29099700 | 0.06903500  | -0.09158500 | H  | -3.33590000 | 0.09480000  | -0.05540000 |
| N  | -1.04160300 | -0.19485900 | -0.05007700 | N  | -1.09540000 | -0.18960000 | -0.05290000 |
| C  | -0.16724800 | -3.81557800 | 0.07068900  | C  | -0.25350000 | -3.81970000 | -0.04010000 |
| H  | -0.36567400 | -4.20966100 | 1.07238200  | H  | -0.38220000 | -4.23620000 | 0.96410000  |
| H  | -0.93615300 | -4.22865800 | -0.58033500 | H  | -1.07110000 | -4.20690000 | -0.64530000 |
| H  | 0.81566400  | -4.17069600 | -0.24571200 | H  | 0.70320000  | -4.17150000 | -0.43280000 |

|    |             |             |             |    |             |             |             |
|----|-------------|-------------|-------------|----|-------------|-------------|-------------|
| Cl | 6.32065400  | -1.67850000 | -0.99538000 | Cl | 6.28180000  | -1.58510000 | -0.90760000 |
| C  | -5.76703500 | -0.71918000 | 1.07838700  | C  | -5.80770000 | -0.68740000 | 1.07800000  |
| C  | -5.67397700 | -0.68635900 | -1.41165000 | C  | -5.70300000 | -0.52880000 | -1.40740000 |
| C  | -5.84650000 | 0.77117800  | 1.44689800  | C  | -5.79010000 | 0.78450000  | 1.51700000  |
| H  | -6.78079700 | -1.11780300 | 0.96347200  | H  | -6.84380000 | -1.01490000 | 0.94260000  |
| H  | -5.30200600 | -1.27715800 | 1.89557200  | H  | -5.37840000 | -1.31480000 | 1.86390000  |
| C  | -5.46021100 | 0.76036000  | -1.91440800 | C  | -5.36640000 | 0.91620000  | -1.83760000 |
| H  | -6.74274700 | -0.87623900 | -1.28155500 | H  | -6.78360000 | -0.63620000 | -1.28360000 |
| H  | -5.32878100 | -1.38042200 | -2.18462400 | H  | -5.41100000 | -1.21140000 | -2.21190000 |
| C  | -6.41941300 | 1.68713800  | 0.35249500  | C  | -6.29910000 | 1.78120000  | 0.46210000  |
| H  | -4.84904100 | 1.13497800  | 1.72485500  | H  | -4.77010000 | 1.06660000  | 1.80740000  |
| H  | -6.45850800 | 0.85363600  | 2.35311300  | H  | -6.39640000 | 0.86690000  | 2.42670000  |
| C  | -5.47810900 | 1.88075400  | -0.85072800 | C  | -5.33160000 | 1.98210000  | -0.71930000 |
| H  | -6.24039400 | 0.95202000  | -2.66017100 | H  | -6.10680000 | 1.20110000  | -2.59350000 |
| H  | -4.51178000 | 0.81801100  | -2.45850800 | H  | -4.39910000 | 0.92140000  | -2.35020000 |
| H  | -7.39586000 | 1.31302000  | 0.01847800  | H  | -7.28660000 | 1.47130000  | 0.09700000  |
| H  | -6.61157300 | 2.66919100  | 0.79711600  | H  | -6.44840000 | 2.74950000  | 0.95070000  |
| H  | -5.73000100 | 2.81814200  | -1.35696200 | H  | -5.52180000 | 2.95710000  | -1.17870000 |
| H  | -4.46376800 | 2.03164700  | -0.45957700 | H  | -4.31550000 | 2.05390000  | -0.31050000 |
| N  | -5.05055900 | -1.07162000 | -0.14826100 | N  | -5.10740000 | -1.01640000 | -0.16470000 |
| 12 |             |             |             |    |             |             |             |
| C  | 1.54956900  | 3.43554300  | 0.87687000  | C  | 1.76750000  | 3.23160000  | 0.93280000  |
| C  | 0.83300600  | 2.25672300  | 1.06108600  | C  | 0.97330000  | 2.10050000  | 1.09210000  |
| C  | 0.23110900  | 1.61382400  | -0.02609100 | C  | 0.26040000  | 1.57710000  | 0.00800000  |
| C  | 0.32379200  | 2.19377700  | -1.29122700 | C  | 0.32210000  | 2.22590000  | -1.22440000 |
| C  | 1.02159100  | 3.37719400  | -1.48892800 | C  | 1.09600000  | 3.36500000  | -1.39480000 |
| C  | 1.63773000  | 3.98126300  | -0.39763700 | C  | 1.82210000  | 3.84940000  | -0.31070000 |
| H  | 2.01626900  | 3.92322600  | 1.72081600  | H  | 2.32310000  | 3.62640000  | 1.77120000  |
| H  | -0.16365500 | 1.69831900  | -2.12118200 | H  | -0.24780000 | 1.81580000  | -2.04810000 |
| H  | 1.09335700  | 3.82080400  | -2.47266300 | H  | 1.14660000  | 3.86450000  | -2.35260000 |
| N  | -0.51633800 | 0.41093500  | 0.12442000  | N  | -0.53840000 | 0.40800000  | 0.12680000  |
| C  | -0.07850900 | -0.85807800 | 0.46035900  | C  | -0.14090000 | -0.88600000 | 0.40950000  |
| C  | -1.20704100 | -1.67121600 | 0.47036100  | C  | -1.29580000 | -1.66000000 | 0.39560000  |
| C  | -2.26975200 | -0.79758500 | 0.12466900  | C  | -2.33030000 | -0.73930000 | 0.09020000  |
| C  | -3.71703300 | -1.14087200 | -0.02127600 | C  | -3.78600000 | -1.03470000 | -0.05580000 |
| O  | -4.13452200 | -2.27779300 | 0.15419700  | O  | -4.23600000 | -2.16410000 | 0.08840000  |
| N  | -4.50089000 | -0.07790100 | -0.36498900 | N  | -4.54430000 | 0.05720000  | -0.36210000 |



|    |             |             |             |    |             |             |             |
|----|-------------|-------------|-------------|----|-------------|-------------|-------------|
| C  | 1.31192600  | -1.21126300 | 0.70081200  | C  | 1.23530000  | -1.28910000 | 0.63130000  |
| C  | 1.79358200  | -2.03952200 | 1.68815100  | C  | 1.67840000  | -2.21720000 | 1.54530000  |
| S  | 2.61456000  | -0.69174600 | -0.34785000 | S  | 2.57160000  | -0.67640000 | -0.32000000 |
| C  | 3.19007600  | -2.25366200 | 1.62428100  | C  | 3.07450000  | -2.43720000 | 1.50250000  |
| H  | 1.15624300  | -2.46171300 | 2.45279600  | H  | 1.01200000  | -2.70310000 | 2.24400000  |
| C  | 3.79976000  | -1.59199100 | 0.58153800  | C  | 3.71950000  | -1.67860000 | 0.55080000  |
| H  | 3.74471200  | -2.86299600 | 2.32440200  | H  | 3.60480000  | -3.11820000 | 2.15340000  |
| Cl | 0.67767000  | 1.62376000  | 2.68006800  | Cl | 0.87720000  | 1.36510000  | 2.67160000  |
| Cl | 2.53682300  | 5.46942800  | -0.62554100 | Cl | 2.82340000  | 5.27580000  | -0.50810000 |
| H  | -4.06314600 | 0.82582000  | -0.47513500 | H  | -4.09180000 | 0.95590000  | -0.44690000 |
| N  | -1.84414800 | 0.44641000  | -0.08798300 | N  | -1.86480000 | 0.49810000  | -0.07820000 |
| C  | -6.27833600 | -0.95662200 | -1.71125300 | C  | -6.34290000 | -0.76260000 | -1.70780000 |
| C  | -6.63066200 | -0.45295700 | 0.67017700  | C  | -6.65950000 | -0.32210000 | 0.68920000  |
| C  | -7.76650900 | -0.75393400 | -2.00533800 | C  | -7.83420000 | -0.54950000 | -1.97420000 |
| H  | -6.06848300 | -2.01861200 | -1.52055000 | H  | -6.13370000 | -1.82850000 | -1.54130000 |
| H  | -5.67231500 | -0.64111100 | -2.56395300 | H  | -5.74610000 | -0.42960000 | -2.56030000 |
| C  | -8.12732400 | -0.23766200 | 0.43414000  | C  | -8.15840000 | -0.09810000 | 0.48010000  |
| H  | -6.43890700 | -1.48922800 | 0.98254300  | H  | -6.46470000 | -1.36800000 | 0.96420000  |
| H  | -6.26742700 | 0.20978800  | 1.45922300  | H  | -6.28150000 | 0.31530000  | 1.49190000  |
| C  | -8.61855300 | -1.05684500 | -0.76619900 | C  | -8.66450000 | -0.89240000 | -0.73080000 |
| H  | -8.05816000 | -1.39667000 | -2.84206200 | H  | -8.13930000 | -1.16450000 | -2.82660000 |
| H  | -7.92924000 | 0.28363000  | -2.31799800 | H  | -8.00060000 | 0.49850000  | -2.24800000 |
| H  | -8.67694300 | -0.51132000 | 1.34036600  | H  | -8.69610000 | -0.38940000 | 1.38780000  |
| H  | -8.30892300 | 0.82731800  | 0.25088500  | H  | -8.33940000 | 0.97050000  | 0.31880000  |
| H  | -9.67403200 | -0.84841000 | -0.96648800 | H  | -9.72490000 | -0.68940000 | -0.90820000 |
| H  | -8.54571300 | -2.12567700 | -0.52921300 | H  | -8.57460000 | -1.96570000 | -0.52150000 |
| N  | -5.88805000 | -0.12252700 | -0.56009000 | N  | -5.93380000 | 0.04290000  | -0.54210000 |
| C  | -1.27067700 | -3.14295800 | 0.73704200  | C  | -1.40470000 | -3.13670000 | 0.60850000  |
| H  | -1.56501300 | -3.34589600 | 1.77185700  | H  | -1.65540000 | -3.36690000 | 1.64920000  |
| H  | -2.02271800 | -3.61078100 | 0.10381400  | H  | -2.20490000 | -3.54800000 | -0.00390000 |
| H  | -0.29895300 | -3.61018200 | 0.56440300  | H  | -0.45990000 | -3.63060000 | 0.37130000  |
| C  | 5.16222900  | -1.56480600 | 0.22729600  | C  | 5.09140000  | -1.62830000 | 0.24240000  |
| C  | 6.32985800  | -1.53185300 | -0.08321000 | C  | 6.26680000  | -1.56920000 | -0.03040000 |
| C  | 7.73601100  | -1.51681400 | -0.46864900 | C  | 7.67960000  | -1.52780000 | -0.38490000 |
| C  | 8.11235800  | -2.61559500 | -1.48596100 | C  | 8.03220000  | -2.40030000 | -1.60880000 |
| H  | 8.35487000  | -1.62593800 | 0.43051900  | H  | 8.27600000  | -1.85170000 | 0.47690000  |
| H  | 7.98118300  | -0.53329900 | -0.88819200 | H  | 7.97070000  | -0.48880000 | -0.58350000 |

|    |             |             |             |    |             |             |             |
|----|-------------|-------------|-------------|----|-------------|-------------|-------------|
| C  | 9.59314900  | -2.56967600 | -1.86775200 | C  | 9.52150000  | -2.33110000 | -1.95240000 |
| H  | 7.86318400  | -3.59165100 | -1.05901900 | H  | 7.73900000  | -3.43390000 | -1.40160000 |
| H  | 7.48933400  | -2.49877000 | -2.37771900 | H  | 7.43130000  | -2.07110000 | -2.46180000 |
| H  | 9.83720900  | -3.35479800 | -2.58757000 | H  | 9.75490000  | -2.95320000 | -2.81980000 |
| H  | 9.85752400  | -1.60954500 | -2.32159000 | H  | 9.82650000  | -1.30610000 | -2.18530000 |
| H  | 10.23446500 | -2.71113000 | -0.99228800 | H  | 10.13690000 | -2.67930000 | -1.11690000 |
| 13 |             |             |             |    |             |             |             |
| C  | 1.06569900  | 3.11160400  | 1.24494100  | C  | 1.24030000  | 2.90820000  | 1.29660000  |
| C  | 0.61134800  | 1.79772700  | 1.31156400  | C  | 0.71760000  | 1.61920000  | 1.33100000  |
| C  | 0.13539600  | 1.15088000  | 0.16574800  | C  | 0.10970000  | 1.07040000  | 0.19640000  |
| C  | 0.08485000  | 1.85596800  | -1.03677900 | C  | -0.00290000 | 1.84580000  | -0.95700000 |
| C  | 0.51965200  | 3.17174100  | -1.11671800 | C  | 0.49750000  | 3.13930000  | -1.00130000 |
| C  | 1.01643200  | 3.78324300  | 0.02987300  | C  | 1.12630000  | 3.65290000  | 0.12910000  |
| H  | 1.43721500  | 3.60210200  | 2.13336200  | H  | 1.71680000  | 3.32340000  | 2.17300000  |
| H  | -0.30221400 | 1.35121900  | -1.91277100 | H  | -0.48820000 | 1.41030000  | -1.82090000 |
| H  | 0.48215700  | 3.71233400  | -2.05270700 | H  | 0.41380000  | 3.73730000  | -1.89850000 |
| N  | -0.34435900 | -0.18908900 | 0.19721500  | N  | -0.41550000 | -0.24900000 | 0.18700000  |
| C  | 0.35275700  | -1.36657300 | 0.40144400  | C  | 0.25090000  | -1.45160000 | 0.33280000  |
| C  | -0.58401700 | -2.39275700 | 0.33565100  | C  | -0.71550000 | -2.44730000 | 0.23740000  |
| C  | -1.81302800 | -1.72995700 | 0.08645700  | C  | -1.92730000 | -1.74240000 | 0.02900000  |
| C  | -3.16313300 | -2.35685800 | -0.08198500 | C  | -3.29700000 | -2.32260000 | -0.14490000 |
| O  | -3.32283300 | -3.56137500 | -0.02696100 | O  | -3.50280000 | -3.52010000 | -0.08780000 |
| N  | -4.15131300 | -1.43175300 | -0.29709400 | N  | -4.23980000 | -1.35710000 | -0.36980000 |
| C  | 1.79164000  | -1.44553000 | 0.59957500  | C  | 1.68540000  | -1.57490000 | 0.51130000  |
| C  | 2.45771200  | -2.24923600 | 1.49580700  | C  | 2.33430000  | -2.48400000 | 1.31490000  |
| S  | 2.93346500  | -0.56597000 | -0.39515400 | S  | 2.84130000  | -0.58860000 | -0.35900000 |
| C  | 3.86640000  | -2.16177200 | 1.40557500  | C  | 3.74410000  | -2.39480000 | 1.25260000  |
| H  | 1.93987100  | -2.86832600 | 2.21529400  | H  | 1.80080000  | -3.17640000 | 1.95060000  |
| C  | 4.30115400  | -1.28836600 | 0.43352300  | C  | 4.19360000  | -1.41400000 | 0.39630000  |
| H  | 4.55156300  | -2.70929800 | 2.03792800  | H  | 4.42020000  | -3.01590000 | 1.82340000  |
| Cl | 0.62074300  | 0.99307200  | 2.86019200  | Cl | 0.82380000  | 0.71620000  | 2.82030000  |
| Cl | 1.58451400  | 5.44053900  | -0.04988300 | Cl | 1.78400000  | 5.27860000  | 0.08970000  |
| H  | -3.87996800 | -0.45497300 | -0.29874200 | H  | -3.92650000 | -0.39440000 | -0.34710000 |
| N  | -1.65754000 | -0.41000000 | -0.00222800 | N  | -1.73620000 | -0.42360000 | -0.00800000 |
| C  | -0.33703700 | -3.86468900 | 0.45208600  | C  | -0.50830000 | -3.92760000 | 0.29500000  |
| H  | -0.56113100 | -4.22531900 | 1.46122200  | H  | -0.66690000 | -4.30780000 | 1.30940000  |
| H  | -0.99126700 | -4.41260400 | -0.22395300 | H  | -1.22950000 | -4.43370000 | -0.34400000 |

|    |             |             |             |   |             |             |             |
|----|-------------|-------------|-------------|---|-------------|-------------|-------------|
| H  | 0.70606400  | -4.10127100 | 0.23205100  | H | 0.50860000  | -4.18700000 | -0.00800000 |
| C  | 5.61984400  | -0.94492200 | 0.07896600  | C | 5.51690000  | -1.03790000 | 0.10100000  |
| C  | 6.74787600  | -0.64100300 | -0.23096400 | C | 6.64720000  | -0.69910000 | -0.15840000 |
| C  | 8.11162900  | -0.29907000 | -0.61744700 | C | 8.01140000  | -0.31760000 | -0.50020000 |
| C  | 8.69758000  | -1.22229900 | -1.70748100 | C | 8.51210000  | -0.94250000 | -1.82020000 |
| H  | 8.75456600  | -0.33132900 | 0.27084000  | H | 8.68170000  | -0.60910000 | 0.31760000  |
| H  | 8.13342200  | 0.73945500  | -0.97014900 | H | 8.07300000  | 0.77560000  | -0.56950000 |
| C  | 10.12778400 | -0.83482900 | -2.08828500 | C | 9.94530000  | -0.51890000 | -2.14770000 |
| H  | 8.67009200  | -2.25494000 | -1.34698900 | H | 8.44760000  | -2.03190000 | -1.74170000 |
| H  | 8.04934300  | -1.18372000 | -2.58800800 | H | 7.83630000  | -0.64790000 | -2.62870000 |
| H  | 10.52236900 | -1.50048000 | -2.85987100 | H | 10.28480000 | -0.96870000 | -3.08390000 |
| H  | 10.17314000 | 0.18726000  | -2.47689500 | H | 10.02260000 | 0.56780000  | -2.25250000 |
| H  | 10.79878300 | -0.89231800 | -1.22561300 | H | 10.63890000 | -0.82690000 | -1.35910000 |
| C  | -6.39726200 | -1.28936500 | 0.56021500  | C | -6.42710000 | -1.07050000 | 0.55720000  |
| C  | -6.06432700 | -1.37872900 | -1.75564200 | C | -6.17020000 | -1.12690000 | -1.75800000 |
| H  | -5.87492000 | -1.21944500 | 1.51457900  | H | -5.89520000 | -1.11620000 | 1.50760000  |
| H  | -7.21042400 | -2.01318300 | 0.67591100  | H | -7.32940000 | -1.68340000 | 0.64400000  |
| C  | -6.72690300 | 0.00031400  | -1.51525300 | C | -6.61820000 | 0.32500000  | -1.46130000 |
| H  | -6.82130400 | -2.11682800 | -2.03999800 | H | -7.03560000 | -1.74740000 | -2.01060000 |
| H  | -5.29423900 | -1.37665900 | -2.52743200 | H | -5.44360000 | -1.21520000 | -2.56580000 |
| H  | -7.68044600 | 0.05851700  | -2.04594600 | H | -7.56510000 | 0.54210000  | -1.96110000 |
| C  | -6.95198100 | 0.05951400  | 0.03943200  | C | -6.79090000 | 0.36310000  | 0.10040000  |
| C  | -6.21717400 | 1.33628600  | 0.51916200  | C | -5.85660000 | 1.49470000  | 0.59690000  |
| C  | -6.15418500 | 2.23893300  | -0.72294100 | C | -5.68990000 | 2.42000000  | -0.61840000 |
| H  | -5.20066900 | 1.09237000  | 0.84827000  | H | -4.88170000 | 1.08970000  | 0.88920000  |
| H  | -6.71602600 | 1.80779500  | 1.36944600  | H | -6.25610000 | 2.00660000  | 1.47550000  |
| C  | -5.87073100 | 1.24472100  | -1.85995500 | C | -5.59260000 | 1.43670000  | -1.79530000 |
| H  | -7.12423200 | 2.72323900  | -0.88313800 | H | -6.57980000 | 3.04950000  | -0.73230000 |
| H  | -5.40361600 | 3.02980900  | -0.64371500 | H | -4.82550000 | 3.08420000  | -0.53850000 |
| H  | -6.10048200 | 1.64532800  | -2.85047300 | H | -5.78770000 | 1.90360000  | -2.76370000 |
| H  | -4.80540800 | 0.98680000  | -1.86505000 | H | -4.57980000 | 1.02210000  | -1.84710000 |
| H  | -8.01632000 | 0.14475200  | 0.27213400  | H | -7.82300000 | 0.59930000  | 0.36990000  |
| N  | -5.48191900 | -1.81987200 | -0.47162400 | N | -5.59670000 | -1.67020000 | -0.50950000 |
| 14 |             |             |             |   |             |             |             |
| C  | 1.08052900  | 3.19519200  | 1.19668100  | C | 1.28850000  | 2.99970000  | 1.25060000  |
| C  | 0.56747500  | 1.90450400  | 1.28626000  | C | 0.70300000  | 1.73920000  | 1.31580000  |
| C  | 0.06500100  | 1.25872600  | 0.15124500  | C | 0.06150000  | 1.19700000  | 0.19660000  |

|    |             |             |             |    |             |             |             |
|----|-------------|-------------|-------------|----|-------------|-------------|-------------|
| C  | 0.04798600  | 1.94308700  | -1.06407700 | C  | -0.02020000 | 1.95200000  | -0.97270000 |
| C  | 0.54163200  | 3.23627400  | -1.16701600 | C  | 0.54330000  | 3.21780000  | -1.04790000 |
| C  | 1.06364100  | 3.84581600  | -0.03063500 | C  | 1.20410000  | 3.72370000  | 0.06770000  |
| H  | 1.47202100  | 3.68486100  | 2.07694200  | H  | 1.79050000  | 3.40950000  | 2.11510000  |
| H  | -0.36057500 | 1.44037100  | -1.93141700 | H  | -0.53260000 | 1.52280000  | -1.82400000 |
| H  | 0.52967000  | 3.76080400  | -2.11276000 | H  | 0.48330000  | 3.79980000  | -1.95730000 |
| N  | -0.47469600 | -0.05761100 | 0.20594800  | N  | -0.52500000 | -0.09640000 | 0.21820000  |
| C  | 0.16824200  | -1.26093700 | 0.43672400  | C  | 0.08930000  | -1.32470000 | 0.38000000  |
| C  | -0.81346000 | -2.24496600 | 0.38690300  | C  | -0.91940000 | -2.27840000 | 0.30140000  |
| C  | -2.01043000 | -1.53231500 | 0.11871700  | C  | -2.10060000 | -1.52370000 | 0.08740000  |
| C  | -3.38535500 | -2.10031100 | -0.04548800 | C  | -3.49140000 | -2.04750000 | -0.08160000 |
| O  | -3.60038800 | -3.29574500 | 0.02997300  | O  | -3.73280000 | -3.24000000 | -0.11470000 |
| N  | -4.33735700 | -1.14148000 | -0.28218800 | N  | -4.42450000 | -1.05020000 | -0.19120000 |
| C  | 1.60162100  | -1.40038600 | 0.64140000  | C  | 1.51790000  | -1.50780000 | 0.55650000  |
| C  | 2.22906500  | -2.21450800 | 1.55590000  | C  | 2.12920000  | -2.42550000 | 1.37930000  |
| S  | 2.78382300  | -0.59373800 | -0.36783300 | S  | 2.71260000  | -0.59540000 | -0.34160000 |
| C  | 3.64045400  | -2.19263000 | 1.46773700  | C  | 3.54130000  | -2.40150000 | 1.30950000  |
| H  | 1.68246700  | -2.79452800 | 2.28659400  | H  | 1.56820000  | -3.07790000 | 2.03350000  |
| C  | 4.11595900  | -1.36000400 | 0.47911300  | C  | 4.03020000  | -1.46250000 | 0.42830000  |
| H  | 4.29902000  | -2.75731100 | 2.11312500  | H  | 4.19160000  | -3.03840000 | 1.89270000  |
| Cl | 0.53754200  | 1.12930500  | 2.84961700  | Cl | 0.77460000  | 0.86400000  | 2.82360000  |
| Cl | 1.70586600  | 5.47412000  | -0.13933300 | Cl | 1.94170000  | 5.31330000  | -0.01090000 |
| H  | -4.03122600 | -0.17445800 | -0.31477100 | H  | -4.08950000 | -0.09250000 | -0.19310000 |
| N  | -1.79531500 | -0.22282800 | 0.00456700  | N  | -1.85230000 | -0.21540000 | 0.02900000  |
| C  | -0.63327100 | -3.72387300 | 0.53324900  | C  | -0.77490000 | -3.76540000 | 0.37920000  |
| H  | -0.87917400 | -4.05448400 | 1.54757800  | H  | -0.96030000 | -4.12630000 | 1.39620000  |
| H  | -1.30708800 | -4.25536900 | -0.13668200 | H  | -1.50860000 | -4.24800000 | -0.26340000 |
| H  | 0.39951900  | -4.01087600 | 0.32494700  | H  | 0.23400000  | -4.07010000 | 0.09190000  |
| C  | -6.56280300 | -1.08466100 | 0.62061100  | C  | -6.66140000 | -0.88090000 | 0.62870000  |
| C  | -6.15902500 | -1.25169500 | -1.83239600 | C  | -6.17790000 | -1.05540000 | -1.81000000 |
| C  | -6.80592800 | 0.41822700  | 0.83550200  | C  | -6.78240000 | 0.63570000  | 0.84570000  |
| H  | -7.51924500 | -1.58116100 | 0.42413700  | H  | -7.64770000 | -1.29330000 | 0.39110000  |
| H  | -6.16201900 | -1.52787800 | 1.53621100  | H  | -6.33110000 | -1.36190000 | 1.55330000  |
| C  | -5.99697900 | 0.16118000  | -2.43988400 | C  | -5.83920000 | 0.33510000  | -2.39010000 |
| H  | -7.21759600 | -1.52441400 | -1.81285300 | H  | -7.25890000 | -1.21510000 | -1.83420000 |
| H  | -5.66577900 | -1.97445700 | -2.49020900 | H  | -5.73440000 | -1.82240000 | -2.45290000 |
| C  | -7.30421400 | 1.18542800  | -0.40074800 | C  | -7.16260000 | 1.44180000  | -0.40770000 |

|    |             |             |             |   |             |             |             |
|----|-------------|-------------|-------------|---|-------------|-------------|-------------|
| H  | -5.88390500 | 0.89170300  | 1.19627000  | H | -5.83640000 | 1.02470000  | 1.24310000  |
| H  | -7.53342400 | 0.52055300  | 1.64970700  | H | -7.52930000 | 0.79950000  | 1.63140000  |
| C  | -6.23543600 | 1.36019800  | -1.49539400 | C | -6.03040000 | 1.54420000  | -1.44690000 |
| H  | -6.68966300 | 0.22015000  | -3.28745800 | H | -6.45960000 | 0.46440000  | -3.28400000 |
| H  | -4.99492300 | 0.25698900  | -2.87062900 | H | -4.80300000 | 0.33300000  | -2.74300000 |
| H  | -8.19850000 | 0.70006100  | -0.81274900 | H | -8.06470000 | 1.01880000  | -0.86790000 |
| H  | -7.62660500 | 2.18035600  | -0.07625000 | H | -7.43130000 | 2.45550000  | -0.09330000 |
| H  | -6.49229500 | 2.22653800  | -2.11344100 | H | -6.18980000 | 2.43220000  | -2.06660000 |
| H  | -5.29354800 | 1.63143500  | -1.00162500 | H | -5.09600000 | 1.73920000  | -0.90530000 |
| C  | 5.44933500  | -1.08343300 | 0.12101100  | C | 5.36770000  | -1.15320000 | 0.11960000  |
| C  | 6.59027200  | -0.83664300 | -0.19241500 | C | 6.51080000  | -0.87170000 | -0.15140000 |
| C  | 7.96770800  | -0.56235800 | -0.58427800 | C | 7.88930000  | -0.55950000 | -0.50630000 |
| C  | 8.47939600  | -1.46610000 | -1.72677100 | C | 8.35310000  | -1.22810000 | -1.81820000 |
| H  | 8.61867500  | -0.67851000 | 0.29099900  | H | 8.55000000  | -0.86870000 | 0.31300000  |
| H  | 8.05106900  | 0.48878900  | -0.88700300 | H | 8.00120000  | 0.52830000  | -0.59370000 |
| C  | 9.92573700  | -1.15016100 | -2.11265900 | C | 9.80270000  | -0.87720000 | -2.15930000 |
| H  | 8.39191400  | -2.51134700 | -1.41557800 | H | 8.23840000  | -2.31200000 | -1.72180000 |
| H  | 7.82285100  | -1.34443000 | -2.59348700 | H | 7.68740000  | -0.91540000 | -2.62830000 |
| H  | 10.26697300 | -1.80063600 | -2.92171600 | H | 10.11580000 | -1.35720000 | -3.08970000 |
| H  | 10.02989200 | -0.11513700 | -2.45267700 | H | 9.92990000  | 0.20290000  | -2.28200000 |
| H  | 10.60365800 | -1.29122700 | -1.26515200 | H | 10.48550000 | -1.20460000 | -1.36900000 |
| N  | -5.67135700 | -1.47247600 | -0.47333900 | N | -5.76220000 | -1.32830000 | -0.43450000 |
| 15 |             |             |             |   |             |             |             |
| C  | 1.13118500  | 3.62712600  | 0.83746200  | C | 1.36430000  | 3.44980000  | 0.86960000  |
| C  | 0.46948200  | 2.42002000  | 1.04250800  | C | 0.62280000  | 2.28830000  | 1.06090000  |
| C  | -0.08511900 | 1.72170100  | -0.03559700 | C | -0.04880000 | 1.69190000  | -0.01200000 |
| C  | -0.00214900 | 2.27348500  | -1.31393300 | C | -0.00070000 | 2.29770000  | -1.26660000 |
| C  | 0.64082300  | 3.48392100  | -1.53282900 | C | 0.72030000  | 3.46580000  | -1.46950000 |
| C  | 1.21139900  | 4.14430900  | -0.44942000 | C | 1.40700000  | 4.02380000  | -0.39510000 |
| H  | 1.56172400  | 4.15785000  | 1.67463400  | H | 1.88840000  | 3.90130000  | 1.69970000  |
| H  | -0.45325400 | 1.73436800  | -2.13720100 | H | -0.53870000 | 1.83100000  | -2.08160000 |
| H  | 0.70538700  | 3.90566700  | -2.52662600 | H | 0.76060000  | 3.93190000  | -2.44440000 |
| N  | -0.77607300 | 0.48823500  | 0.13606900  | N | -0.79270000 | 0.49090000  | 0.14000000  |
| C  | -0.28272000 | -0.74944100 | 0.50983100  | C | -0.33860000 | -0.77130000 | 0.47630000  |
| C  | -1.37112900 | -1.61548200 | 0.52658000  | C | -1.45490000 | -1.60000000 | 0.47550000  |
| C  | -2.46955700 | -0.80290800 | 0.14546200  | C | -2.52720000 | -0.74200000 | 0.12170000  |
| C  | -3.89683700 | -1.21864300 | -0.00912300 | C | -3.96480000 | -1.11200000 | -0.03320000 |

|    |             |             |             |    |             |             |             |
|----|-------------|-------------|-------------|----|-------------|-------------|-------------|
| O  | -4.26197400 | -2.36970700 | 0.18933200  | O  | -4.36280000 | -2.25590000 | 0.14520000  |
| N  | -4.72588800 | -0.20295800 | -0.38790600 | N  | -4.76950000 | -0.06920000 | -0.38830000 |
| C  | 1.11953000  | -1.02914600 | 0.77677200  | C  | 1.05170000  | -1.09940000 | 0.73170000  |
| C  | 1.62618100  | -1.80982600 | 1.79010200  | C  | 1.52410000  | -1.97160000 | 1.68520000  |
| S  | 2.41055200  | -0.47201400 | -0.26680600 | S  | 2.37200000  | -0.45750000 | -0.22280000 |
| C  | 3.03203400  | -1.95795300 | 1.74966500  | C  | 2.92960000  | -2.12570000 | 1.66980000  |
| H  | 0.99893100  | -2.24414300 | 2.55629200  | H  | 0.87080000  | -2.46340000 | 2.39200000  |
| C  | 3.62422100  | -1.29236500 | 0.69925100  | C  | 3.55250000  | -1.37140000 | 0.69990000  |
| H  | 3.60514300  | -2.52297400 | 2.47173800  | H  | 3.48160000  | -2.75640000 | 2.35250000  |
| Cl | 0.32162300  | 1.82086300  | 2.67499300  | Cl | 0.53950000  | 1.60730000  | 2.66530000  |
| Cl | 2.04113800  | 5.66803200  | -0.70371400 | Cl | 2.34180000  | 5.48870000  | -0.63280000 |
| H  | -4.33027800 | 0.71782500  | -0.51483200 | H  | -4.35890000 | 0.84660000  | -0.49940000 |
| N  | -2.10102400 | 0.45442700  | -0.09360800 | N  | -2.11850000 | 0.50940000  | -0.08640000 |
| C  | -6.44336500 | -1.19694500 | -1.73197900 | C  | -6.50650000 | -1.02090000 | -1.72810000 |
| C  | -6.84779900 | -0.65467100 | 0.63268900  | C  | -6.87990000 | -0.51270000 | 0.64740000  |
| C  | -7.93582000 | -1.07223700 | -2.04701200 | C  | -8.00220000 | -0.88920000 | -2.02180000 |
| H  | -6.18584500 | -2.24298500 | -1.51351900 | H  | -6.24930000 | -2.06900000 | -1.52100000 |
| H  | -5.84273300 | -0.87310200 | -2.58536800 | H  | -5.91360000 | -0.68940000 | -2.58380000 |
| C  | -8.35002400 | -0.51655700 | 0.37522800  | C  | -8.38440000 | -0.36860000 | 0.41040000  |
| H  | -6.61094200 | -1.67296100 | 0.97206400  | H  | -6.63970000 | -1.53780000 | 0.96210000  |
| H  | -6.52588700 | 0.04306300  | 1.40941900  | H  | -6.54480000 | 0.16990000  | 1.43190000  |
| C  | -8.78739800 | -1.38621700 | -0.81032500 | C  | -8.83370000 | -1.22820000 | -0.77810000 |
| H  | -8.18669600 | -1.74750300 | -2.87123800 | H  | -8.26480000 | -1.54760000 | -2.85580000 |
| H  | -8.14361900 | -0.05116800 | -2.38613500 | H  | -8.21420000 | 0.13930000  | -2.33480000 |
| H  | -8.89692700 | -0.79467800 | 1.28173600  | H  | -8.92130000 | -0.65340000 | 1.32060000  |
| H  | -8.57966000 | 0.53394200  | 0.16437800  | H  | -8.61370000 | 0.68380000  | 0.20860000  |
| H  | -9.84907000 | -1.23302200 | -1.02707700 | H  | -9.89990000 | -1.08290000 | -0.97680000 |
| H  | -8.66696400 | -2.44452400 | -0.54695900 | H  | -8.69590000 | -2.28800000 | -0.52960000 |
| N  | -6.10688500 | -0.31837400 | -0.59702900 | N  | -6.15380000 | -0.15650000 | -0.58640000 |
| C  | -1.36813100 | -3.08145200 | 0.83013900  | C  | -1.49670000 | -3.07140000 | 0.74200000  |
| H  | -1.66555000 | -3.27227700 | 1.86639200  | H  | -1.75070000 | -3.27510000 | 1.78730000  |
| H  | -2.08901000 | -3.60038400 | 0.20051700  | H  | -2.26770000 | -3.54270000 | 0.13540000  |
| H  | -0.37318800 | -3.50589400 | 0.68076700  | H  | -0.52630000 | -3.52800000 | 0.53500000  |
| C  | 4.98876200  | -1.20748100 | 0.36262700  | C  | 4.92490000  | -1.26750000 | 0.40850000  |
| C  | 6.15824800  | -1.12709800 | 0.06722000  | C  | 6.10070000  | -1.16530000 | 0.15010000  |
| C  | 7.56647900  | -1.03670400 | -0.29983800 | C  | 7.51440000  | -1.07170000 | -0.18970000 |
| C  | 8.02355800  | -2.07458800 | -1.35803600 | C  | 7.93370000  | -1.94920000 | -1.39750000 |

|    |             |             |             |    |             |             |             |
|----|-------------|-------------|-------------|----|-------------|-------------|-------------|
| H  | 8.18107700  | -1.15232500 | 0.60257700  | H  | 8.11470000  | -1.35860000 | 0.68360000  |
| H  | 7.76656100  | -0.02714700 | -0.67810900 | H  | 7.76060000  | -0.02440000 | -0.40130000 |
| C  | 9.46885800  | -1.78599900 | -1.78088000 | C  | 9.40110000  | -1.68110000 | -1.75010000 |
| H  | 7.37598100  | -1.94905400 | -2.23365400 | H  | 7.31040000  | -1.64930000 | -2.24820000 |
| H  | 9.79752700  | -2.48906200 | -2.55079700 | H  | 9.70690000  | -2.27000000 | -2.61880000 |
| H  | 9.57579300  | -0.77469500 | -2.18415400 | H  | 9.57320000  | -0.62590000 | -1.98180000 |
| H  | 10.15294200 | -1.88224700 | -0.93072000 | H  | 10.05700000 | -1.95380000 | -0.91610000 |
| C  | 7.86562700  | -3.50989900 | -0.84528800 | C  | 7.68960000  | -3.43600000 | -1.11960000 |
| H  | 8.50367100  | -3.68354500 | 0.02839600  | H  | 8.29730000  | -3.77460000 | -0.27310000 |
| H  | 6.83326400  | -3.71797700 | -0.55528200 | H  | 6.64120000  | -3.62890000 | -0.88110000 |
| H  | 8.15271300  | -4.23139300 | -1.61507600 | H  | 7.95900000  | -4.04300000 | -1.98810000 |
| 16 |             |             |             |    |             |             |             |
| C  | 0.69111500  | 3.33171300  | 1.16926900  | C  | 0.89000000  | 3.17090000  | 1.20060000  |
| C  | 0.22584800  | 2.02493200  | 1.28311900  | C  | 0.35690000  | 1.88940000  | 1.29820000  |
| C  | -0.23371200 | 1.33317800  | 0.15704300  | C  | -0.23690000 | 1.28230000  | 0.18620000  |
| C  | -0.25723600 | 1.98678300  | -1.07498300 | C  | -0.32520000 | 1.99260000  | -1.01030000 |
| C  | 0.18874500  | 3.29501200  | -1.20252700 | C  | 0.18590000  | 3.27810000  | -1.11850000 |
| C  | 0.66919900  | 3.95135000  | -0.07390600 | C  | 0.80070000  | 3.84980000  | -0.00840000 |
| H  | 1.04975700  | 3.85712500  | 2.04289300  | H  | 1.35570000  | 3.63120000  | 2.06020000  |
| H  | -0.63266800 | 1.44801800  | -1.93562800 | H  | -0.80060000 | 1.51300000  | -1.85620000 |
| H  | 0.17200500  | 3.79566300  | -2.16105400 | H  | 0.12100000  | 3.82560000  | -2.04890000 |
| N  | -0.72408300 | -0.00110500 | 0.23626600  | N  | -0.76830000 | -0.03370000 | 0.24130000  |
| C  | -0.04006000 | -1.17313800 | 0.50660800  | C  | -0.10600000 | -1.22810000 | 0.45790000  |
| C  | -0.98307400 | -2.19475000 | 0.46641400  | C  | -1.07140000 | -2.22660000 | 0.39320000  |
| C  | -2.20158500 | -1.53492100 | 0.16247700  | C  | -2.27890000 | -1.53130000 | 0.12980000  |
| C  | -3.55145700 | -2.15845400 | -0.00838100 | C  | -3.64240000 | -2.12020000 | -0.04730000 |
| O  | -3.72250900 | -3.35913900 | 0.09214900  | O  | -3.83290000 | -3.32220000 | -0.03640000 |
| N  | -4.53498800 | -1.24223400 | -0.28191200 | N  | -4.61340000 | -1.16870000 | -0.21730000 |
| C  | 1.39398400  | -1.25296500 | 0.73687800  | C  | 1.32500000  | -1.34330000 | 0.66830000  |
| C  | 2.03639300  | -2.02100600 | 1.68047100  | C  | 1.95730000  | -2.20610000 | 1.53370000  |
| S  | 2.56149000  | -0.42521900 | -0.27227400 | S  | 2.49850000  | -0.41110000 | -0.23730000 |
| C  | 3.44716200  | -1.94688400 | 1.61449800  | C  | 3.36820000  | -2.12410000 | 1.49010000  |
| H  | 1.50002100  | -2.60436300 | 2.41606300  | H  | 1.41090000  | -2.85960000 | 2.19900000  |
| C  | 3.90739600  | -1.11963600 | 0.61409400  | C  | 3.83520000  | -1.19510000 | 0.58670000  |
| H  | 4.11567700  | -2.47031200 | 2.28399900  | H  | 4.03270000  | -2.71290000 | 2.10700000  |
| Cl | 0.20047200  | 1.28712400  | 2.86453300  | Cl | 0.43310000  | 1.07010000  | 2.83690000  |
| Cl | 1.25110100  | 5.59984500  | -0.21327500 | Cl | 1.47210000  | 5.46590000  | -0.12790000 |

|   |             |             |             |   |             |             |             |
|---|-------------|-------------|-------------|---|-------------|-------------|-------------|
| H | -4.26447800 | -0.26553600 | -0.33500900 | H | -4.32080000 | -0.19750000 | -0.23930000 |
| N | -2.03407800 | -0.22135000 | 0.01902500  | N | -2.08520000 | -0.21620000 | 0.03070000  |
| C | -0.74968000 | -3.66174000 | 0.65230600  | C | -0.86580000 | -3.70240000 | 0.52560000  |
| H | -0.99500200 | -3.97587900 | 1.67201300  | H | -1.05700000 | -4.03610000 | 1.55080000  |
| H | -1.39527900 | -4.23460200 | -0.01124300 | H | -1.56490000 | -4.23780000 | -0.11380000 |
| H | 0.29548100  | -3.91496200 | 0.46268300  | H | 0.16090000  | -3.97310000 | 0.26890000  |
| C | -6.77722300 | -1.24232400 | 0.57999700  | C | -6.86320000 | -1.08920000 | 0.58270000  |
| C | -6.32268000 | -1.46611900 | -1.85958300 | C | -6.35060000 | -1.28100000 | -1.84870000 |
| C | -7.07955200 | 0.25604600  | 0.74583400  | C | -7.05430000 | 0.42350000  | 0.77460000  |
| H | -7.71096100 | -1.77969800 | 0.38186100  | H | -7.82750000 | -1.54960000 | 0.34330000  |
| H | -6.37725600 | -1.64334100 | 1.51520200  | H | -6.52000000 | -1.54050000 | 1.51750000  |
| C | -6.20258300 | -0.06661700 | -2.50644600 | C | -6.07240000 | 0.11440000  | -2.44930000 |
| H | -7.37046400 | -1.77822200 | -1.85005600 | H | -7.42280000 | -1.49120000 | -1.87860000 |
| H | -5.79079900 | -2.18881100 | -2.48662800 | H | -5.86650000 | -2.03660000 | -2.47560000 |
| C | -7.58276700 | 0.96770200  | -0.52125400 | C | -7.45900000 | 1.19230000  | -0.49450000 |
| H | -6.18253600 | 0.77406900  | 1.10844100  | H | -6.13020000 | 0.86070000  | 1.17350000  |
| H | -7.82533400 | 0.35467400  | 1.54378600  | H | -7.81470000 | 0.56570000  | 1.55140000  |
| C | -6.50116900 | 1.14968200  | -1.60207900 | C | -6.32380000 | 1.32810000  | -1.52650000 |
| H | -6.88248400 | -0.05835200 | -3.36629400 | H | -6.69300000 | 0.20130000  | -3.34830000 |
| H | -5.19757000 | 0.05409400  | -2.92384100 | H | -5.03520000 | 0.15420000  | -2.79690000 |
| H | -8.45100300 | 0.43758800  | -0.93377700 | H | -8.33790000 | 0.72280000  | -0.95480000 |
| H | -7.94720500 | 1.95907200  | -0.23233500 | H | -7.77470000 | 2.19790000  | -0.19840000 |
| H | -6.77769000 | 1.98784000  | -2.24979300 | H | -6.51670000 | 2.19860000  | -2.16120000 |
| H | -5.57879500 | 1.46924200  | -1.10039500 | H | -5.40330000 | 1.57210000  | -0.98100000 |
| C | 5.23513600  | -0.79953900 | 0.27176100  | C | 5.16480000  | -0.84160000 | 0.29210000  |
| C | 6.37168300  | -0.51710700 | -0.02814800 | C | 6.30160000  | -0.52540000 | 0.03240000  |
| C | 7.74097400  | -0.18225400 | -0.40096400 | C | 7.67330000  | -0.17390000 | -0.31050000 |
| C | 8.32693800  | -1.04984500 | -1.54542400 | C | 8.22520000  | -0.91940000 | -1.55320000 |
| H | 8.38640400  | -0.27335600 | 0.48255000  | H | 8.32480000  | -0.38350000 | 0.54810000  |
| H | 7.77620100  | 0.87293600  | -0.69708900 | H | 7.73040000  | 0.90740000  | -0.48280000 |
| C | 9.70150100  | -0.50978200 | -1.95762200 | C | 9.61950000  | -0.38670000 | -1.90200000 |
| H | 7.64823900  | -0.95596500 | -2.40121700 | H | 7.54960000  | -0.70130000 | -2.38860000 |
| H | 10.11595600 | -1.09025200 | -2.78610700 | H | 10.01320000 | -0.88050000 | -2.79430000 |
| H | 9.64403200  | 0.53488900  | -2.27728000 | H | 9.60270000  | 0.69030000  | -2.09360000 |
| H | 10.41129900 | -0.56736000 | -1.12522100 | H | 10.32230000 | -0.57180000 | -1.08230000 |
| C | 8.40114600  | -2.52861900 | -1.15087000 | C | 8.24660000  | -2.43520000 | -1.33160000 |
| H | 9.07776300  | -2.67114900 | -0.30089700 | H | 8.91350000  | -2.69390000 | -0.50150000 |



|    |             |             |             |    |             |             |             |
|----|-------------|-------------|-------------|----|-------------|-------------|-------------|
| H  | 7.41934900  | -2.91528700 | -0.86851900 | H  | 7.25050000  | -2.81650000 | -1.09580000 |
| H  | 8.77735500  | -3.13376900 | -1.98021700 | H  | 8.60770000  | -2.95330000 | -2.22400000 |
| N  | -5.85216100 | -1.62817400 | -0.48631700 | N  | -5.93480000 | -1.51180000 | -0.46580000 |
| 18 |             |             |             |    |             |             |             |
| C  | 1.63667600  | 3.48455800  | 1.01736900  | C  | 1.86824500  | 3.25890600  | 1.07442400  |
| C  | 0.90550500  | 2.30703900  | 1.14369700  | C  | 1.05459300  | 2.13410900  | 1.16665900  |
| C  | 0.30463100  | 1.72042000  | 0.02466600  | C  | 0.34550000  | 1.67943500  | 0.04954300  |
| C  | 0.41304400  | 2.35540700  | -1.21246200 | C  | 0.43083400  | 2.39022600  | -1.14663100 |
| C  | 1.12541500  | 3.53837200  | -1.35213600 | C  | 1.22446500  | 3.52379700  | -1.24968700 |
| C  | 1.74040200  | 4.08575000  | -0.23070200 | C  | 1.94620700  | 3.93933800  | -0.13456700 |
| H  | 2.10244200  | 3.92861200  | 1.88556300  | H  | 2.42071400  | 3.60064200  | 1.93789800  |
| H  | -0.07328300 | 1.90303600  | -2.06730300 | H  | -0.13581400 | 2.03238100  | -1.99655200 |
| H  | 1.20945700  | 4.02465200  | -2.31449500 | H  | 1.29351700  | 4.07130100  | -2.17969100 |
| N  | -0.45659300 | 0.51999600  | 0.11550100  | N  | -0.47170300 | 0.51813800  | 0.09912800  |
| C  | -0.03516200 | -0.76671700 | 0.40157500  | C  | -0.09608100 | -0.79474600 | 0.32107000  |
| C  | -1.17220800 | -1.56837300 | 0.36827200  | C  | -1.26203900 | -1.54956900 | 0.25749500  |
| C  | -2.22279000 | -0.66779000 | 0.05029200  | C  | -2.28008500 | -0.59761500 | -0.00788600 |
| C  | -3.67077400 | -0.98643500 | -0.13680100 | C  | -3.73696100 | -0.86589200 | -0.18137700 |
| O  | -4.11195200 | -2.11753400 | 0.02263500  | O  | -4.20826000 | -1.98855300 | -0.04550200 |
| N  | -4.42749700 | 0.08898300  | -0.50001000 | N  | -4.47129700 | 0.23737600  | -0.50169400 |
| C  | 1.35429200  | -1.14011100 | 0.62252700  | C  | 1.27495200  | -1.22491400 | 0.52855800  |
| C  | 1.84274800  | -1.99092000 | 1.58666400  | C  | 1.70965900  | -2.18987100 | 1.40750800  |
| S  | 2.64658000  | -0.61332800 | -0.43568300 | S  | 2.61579800  | -0.59554800 | -0.40554700 |
| C  | 3.23602600  | -2.21728200 | 1.49751200  | C  | 3.10261900  | -2.42618600 | 1.35069000  |
| H  | 1.21349700  | -2.42139600 | 2.35315000  | H  | 1.04074800  | -2.69167000 | 2.09206400  |
| C  | 3.83669900  | -1.54168600 | 0.45853600  | C  | 3.75398700  | -1.64239500 | 0.42405300  |
| H  | 3.79485000  | -2.84497300 | 2.17779900  | H  | 3.62634100  | -3.13651500 | 1.97507400  |
| Cl | 0.72962700  | 1.60537100  | 2.73195900  | Cl | 0.92874600  | 1.31980400  | 2.70480500  |
| Cl | 2.65792900  | 5.57206900  | -0.38551200 | Cl | 2.97196000  | 5.35757600  | -0.24738600 |
| H  | -3.97279000 | 0.98654200  | -0.59069900 | H  | -4.00311600 | 1.12944300  | -0.57121300 |
| N  | -1.78179500 | 0.57897100  | -0.10643900 | N  | -1.79497700 | 0.63920000  | -0.11140500 |
| C  | -6.19194600 | -0.74987000 | -1.88769400 | C  | -6.27787800 | -0.54497800 | -1.85804200 |
| C  | -6.58522600 | -0.25429800 | 0.48909100  | C  | -6.59919700 | -0.10456200 | 0.53844200  |
| C  | -7.66966200 | -0.51814500 | -2.21159300 | C  | -7.76346300 | -0.30299200 | -2.13189700 |
| H  | -6.00547900 | -1.81665700 | -1.69930500 | H  | -6.08965200 | -1.61500800 | -1.69272800 |
| H  | -5.56240500 | -0.44046000 | -2.72542800 | H  | -5.67026400 | -0.22138200 | -2.70640700 |
| C  | -8.07227800 | -0.00946000 | 0.22300900  | C  | -8.09221300 | 0.14910300  | 0.32183800  |

|    |             |             |             |   |             |             |             |
|----|-------------|-------------|-------------|---|-------------|-------------|-------------|
| H  | -6.41989900 | -1.29603300 | 0.79827000  | H | -6.42671700 | -1.15501100 | 0.81114400  |
| H  | -6.22642600 | 0.39640200  | 1.29010400  | H | -6.21308400 | 0.52289300  | 1.34519200  |
| C  | -8.55306200 | -0.81233700 | -0.99247400 | C | -8.60688400 | -0.63253300 | -0.89363600 |
| H  | -7.95530800 | -1.15060500 | -3.05814200 | H | -8.07554500 | -0.91041300 | -2.98718800 |
| H  | -7.80668600 | 0.52399800  | -2.52129700 | H | -7.90831700 | 0.74845900  | -2.40437300 |
| H  | -8.64585600 | -0.27815700 | 1.11575400  | H | -8.64032500 | -0.13373700 | 1.22593900  |
| H  | -8.23013200 | 1.05978300  | 0.04272500  | H | -8.25148700 | 1.22141500  | 0.16217000  |
| H  | -9.60002900 | -0.58314000 | -1.21358300 | H | -9.66221100 | -0.40866100 | -1.07632200 |
| H  | -8.50504700 | -1.88369900 | -0.76065100 | H | -8.53889200 | -1.70783200 | -0.68634400 |
| N  | -5.81103900 | 0.06992700  | -0.72319800 | N | -5.86008600 | 0.24982700  | -0.68808600 |
| C  | -1.25054900 | -3.05368100 | 0.57347500  | C | -1.40183500 | -3.03431100 | 0.40813200  |
| H  | -1.92534100 | -3.47154500 | -0.17585800 | H | -2.10753400 | -3.39402400 | -0.34251400 |
| H  | -0.25893000 | -3.48329700 | 0.40410800  | H | -0.43286400 | -3.50212000 | 0.21133000  |
| C  | 5.19415500  | -1.52016200 | 0.08492300  | C | 5.12543000  | -1.59796500 | 0.11248100  |
| C  | 6.35741400  | -1.49194400 | -0.24195800 | C | 6.30053100  | -1.54366000 | -0.16263100 |
| C  | 7.75796200  | -1.48222400 | -0.64746000 | C | 7.71239200  | -1.50654200 | -0.52136000 |
| C  | 8.10807000  | -2.56049700 | -1.69559900 | C | 8.04556500  | -2.31885500 | -1.79124900 |
| H  | 8.38843700  | -1.61883700 | 0.23979900  | H | 8.30675400  | -1.88523200 | 0.31923600  |
| H  | 8.00751800  | -0.49165800 | -1.04738500 | H | 8.01990200  | -0.46341700 | -0.66628200 |
| C  | 9.58363400  | -2.52068400 | -2.09775100 | C | 9.53427300  | -2.25570400 | -2.13821800 |
| H  | 7.85476000  | -3.54375300 | -1.28806400 | H | 7.73619100  | -3.35702200 | -1.63740400 |
| H  | 7.47359200  | -2.41632500 | -2.57519800 | H | 7.44655000  | -1.93534700 | -2.62272300 |
| H  | 9.80906500  | -3.29104300 | -2.83926900 | H | 9.75386600  | -2.83487400 | -3.03846200 |
| H  | 9.85158900  | -1.55285200 | -2.53274600 | H | 9.85521200  | -1.22494100 | -2.31829400 |
| H  | 10.23590600 | -2.68929700 | -1.23528600 | H | 10.14734200 | -2.65751600 | -1.32543400 |
| C  | -1.76559900 | -3.45909400 | 1.96514200  | C | -1.91935700 | -3.44653100 | 1.79629700  |
| H  | -1.77577200 | -4.54804000 | 2.06459500  | H | -1.97877500 | -4.53533600 | 1.87698900  |
| H  | -1.13753400 | -3.05148800 | 2.76272400  | H | -1.26582400 | -3.07937000 | 2.59325700  |
| H  | -2.78435800 | -3.09687500 | 2.10866700  | H | -2.91852500 | -3.03770900 | 1.95261100  |
| 19 |             |             |             |   |             |             |             |
| C  | -0.98776200 | 3.45454300  | -1.03638500 | C | 1.29353900  | 3.22868800  | 1.09522500  |
| C  | -0.48780300 | 2.16430300  | -1.18757900 | C | 0.69843400  | 1.97934800  | 1.24156100  |
| C  | -0.05976500 | 1.43271000  | -0.07484000 | C | 0.07671700  | 1.35892700  | 0.15291600  |
| C  | -0.10333600 | 2.02964700  | 1.18466200  | C | 0.02220200  | 2.02603200  | -1.07012500 |
| C  | -0.58476900 | 3.32094500  | 1.35096800  | C | 0.59479100  | 3.28011500  | -1.22724900 |
| C  | -1.03268200 | 4.01722200  | 0.23297500  | C | 1.23764900  | 3.86348400  | -0.13936400 |
| H  | -1.32090300 | 4.01157100  | -1.90045700 | H | 1.77977000  | 3.69952800  | 1.93753400  |

|    |             |             |             |    |             |             |             |
|----|-------------|-------------|-------------|----|-------------|-------------|-------------|
| H  | 0.24754900  | 1.46056500  | 2.03619400  | H  | -0.47515400 | 1.53711300  | -1.89786400 |
| H  | -0.62026200 | 3.77782500  | 2.33060100  | H  | 0.55632800  | 3.79359600  | -2.17821700 |
| N  | 0.45912400  | 0.11173400  | -0.19385000 | N  | -0.51047800 | 0.06955100  | 0.25491700  |
| C  | -0.20671300 | -1.05957500 | -0.50643100 | C  | 0.10986400  | -1.14215300 | 0.50093600  |
| C  | 0.74664300  | -2.07062200 | -0.49172900 | C  | -0.88547000 | -2.10936900 | 0.44841000  |
| C  | 1.95591600  | -1.40311000 | -0.15900400 | C  | -2.06771300 | -1.37856900 | 0.15950900  |
| C  | 3.31994600  | -2.00381100 | -0.02619200 | C  | -3.44951600 | -1.92460400 | 0.00082200  |
| O  | 3.50555100  | -3.20424400 | -0.11092700 | O  | -3.66705900 | -3.12187300 | -0.05010300 |
| N  | 4.30025300  | -1.06901800 | 0.18709900  | N  | -4.40416700 | -0.94511100 | -0.07279900 |
| C  | -1.64264700 | -1.12981100 | -0.75567400 | C  | 1.54119300  | -1.28097200 | 0.71967700  |
| C  | -2.27649000 | -1.67054900 | -1.84830200 | C  | 2.16490300  | -1.98968600 | 1.71812700  |
| S  | -2.81591200 | -0.57868400 | 0.42039800  | S  | 2.72035100  | -0.55948100 | -0.35334000 |
| C  | -3.68873700 | -1.64128200 | -1.76237000 | C  | 3.57700700  | -1.95929900 | 1.64074000  |
| H  | -1.73334900 | -2.05815400 | -2.69946000 | H  | 1.61356100  | -2.49083100 | 2.50149700  |
| C  | -4.15598100 | -1.07463400 | -0.59724600 | C  | 4.05155400  | -1.22109800 | 0.57889700  |
| H  | -4.35298400 | -2.01063800 | -2.53143000 | H  | 4.23713100  | -2.44705500 | 2.34433600  |
| Cl | -0.36983000 | 1.50248700  | -2.79866200 | Cl | 0.72329800  | 1.22440500  | 2.81501900  |
| Cl | -1.65841600 | 5.64479100  | 0.42033400  | Cl | 1.98749800  | 5.43900200  | -0.32040400 |
| H  | 4.01508000  | -0.09685400 | 0.24783000  | H  | -4.08313600 | 0.01759900  | -0.08935400 |
| N  | 1.76999900  | -0.09620400 | 0.02135800  | N  | -1.83059400 | -0.07242600 | 0.03807800  |
| C  | 0.52284500  | -3.54143700 | -0.70212900 | C  | -0.72858700 | -3.59748200 | 0.55780800  |
| H  | -0.41715700 | -3.68654100 | -1.23963000 | H  | 0.20012300  | -3.82800200 | 1.08375400  |
| H  | 1.32693200  | -3.93242200 | -1.32855400 | H  | -1.55655800 | -3.99536500 | 1.14749300  |
| C  | 6.52503300  | -1.03883900 | -0.71582700 | C  | -6.65905800 | -0.78864600 | 0.69500200  |
| C  | 6.12020400  | -1.25840400 | 1.73304200  | C  | -6.12230700 | -1.00511600 | -1.72953400 |
| C  | 6.80174800  | 0.46323200  | -0.89286500 | C  | -6.80385400 | 0.73042300  | 0.87812100  |
| H  | 7.47037700  | -1.56137900 | -0.53369600 | H  | -7.63491600 | -1.21836300 | 0.44564000  |
| H  | 6.11319600  | -1.44924100 | -1.64174400 | H  | -6.34193800 | -1.24592600 | 1.63611500  |
| C  | 5.98885300  | 0.14179400  | 2.37581300  | C  | -5.78593500 | 0.37725800  | -2.32943600 |
| H  | 7.17258200  | -1.55340600 | 1.70506500  | H  | -7.20056900 | -1.17807000 | -1.77347100 |
| H  | 5.61224000  | -1.98702000 | 2.37296500  | H  | -5.65642000 | -1.77994400 | -2.34670800 |
| C  | 7.31792600  | 1.18748200  | 0.36181800  | C  | -7.16697000 | 1.50623500  | -0.39934000 |
| H  | 5.89049300  | 0.96642700  | -1.24052600 | H  | -5.87187800 | 1.14009400  | 1.28784700  |
| H  | 7.53091300  | 0.56959000  | -1.70505700 | H  | -7.56968900 | 0.90016700  | 1.64406100  |
| C  | 6.25387800  | 1.35862600  | 1.46165000  | C  | -6.01389900 | 1.60274400  | -1.41595400 |
| H  | 6.68242800  | 0.16410400  | 3.22439600  | H  | -6.38603100 | 0.48079700  | -3.24045300 |
| H  | 4.98904400  | 0.24885400  | 2.80908700  | H  | -4.74153700 | 0.38077600  | -2.65726300 |

|    |              |             |             |   |             |             |             |
|----|--------------|-------------|-------------|---|-------------|-------------|-------------|
| H  | 8.20120700   | 0.67170600  | 0.76033700  | H | -8.05359100 | 1.06243900  | -0.86992000 |
| H  | 7.66260500   | 2.18272500  | 0.06218900  | H | -7.45518200 | 2.52237800  | -0.11126100 |
| H  | 6.53043000   | 2.20308100  | 2.10108100  | H | -6.17169900 | 2.47554500  | -2.05716800 |
| H  | 5.31805300   | 1.66337600  | 0.97596900  | H | -5.09403600 | 1.82171100  | -0.85883100 |
| C  | -5.48724100  | -0.86943200 | -0.18589700 | C | 5.38466700  | -0.96491100 | 0.20777600  |
| C  | -6.62590500  | -0.68526700 | 0.17493200  | C | 6.52370700  | -0.73127600 | -0.11992200 |
| C  | -8.00157400  | -0.49009400 | 0.61726100  | C | 7.89810800  | -0.48433400 | -0.53652900 |
| C  | -8.55658400  | -1.66309000 | 1.45383500  | C | 8.39198700  | -1.45368800 | -1.63193200 |
| H  | -8.64115900  | -0.33430700 | -0.26026900 | H | 8.55726600  | -0.55658900 | 0.33733100  |
| H  | -8.06082100  | 0.43501700  | 1.20387800  | H | 7.98461300  | 0.54765100  | -0.89867300 |
| C  | -10.00005100 | -1.42442600 | 1.90113100  | C | 9.83631900  | -1.16423300 | -2.04515600 |
| H  | -8.49238600  | -2.58036700 | 0.86094700  | H | 8.30219100  | -2.47949600 | -1.26203200 |
| H  | -7.91153300  | -1.81104200 | 2.32507200  | H | 7.72763500  | -1.37566500 | -2.49782500 |
| H  | -10.37225500 | -2.26579100 | 2.49078800  | H | 10.17086400 | -1.85794300 | -2.82036400 |
| H  | -10.08172900 | -0.52455800 | 2.51863300  | H | 9.93898500  | -0.14850600 | -2.43971700 |
| H  | -10.66732500 | -1.29992100 | 1.04264600  | H | 10.51816000 | -1.26082500 | -1.19444900 |
| C  | 0.48870400   | -4.33999500 | 0.61236000  | C | -0.72556600 | -4.28201500 | -0.81955600 |
| H  | 1.44584400   | -4.25823500 | 1.12868100  | H | -1.67529500 | -4.10234400 | -1.32463700 |
| H  | -0.30382200  | -3.97804500 | 1.27321800  | H | 0.08880200  | -3.90066000 | -1.44204000 |
| H  | 0.30327900   | -5.39827000 | 0.40869500  | H | -0.59577700 | -5.36222300 | -0.71044300 |
| N  | 5.62660500   | -1.43454600 | 0.36929700  | N | -5.73294400 | -1.24596300 | -0.33986600 |
| 20 |              |             |             |   |             |             |             |
| C  | 1.09172500   | 3.83982800  | 0.74679200  | C | 1.43010000  | 3.61000000  | 0.78020000  |
| C  | 0.43416400   | 2.63490600  | 0.97743500  | C | 0.67240000  | 2.46710000  | 1.01650000  |
| C  | -0.05323700  | 1.87548400  | -0.09127800 | C | 0.00570000  | 1.82960000  | -0.03500000 |
| C  | 0.09245100   | 2.36232700  | -1.38977100 | C | 0.07320000  | 2.37710000  | -1.31520000 |
| C  | 0.73235600   | 3.56926700  | -1.63597800 | C | 0.80980000  | 3.52650000  | -1.56350000 |
| C  | 1.23568600   | 4.29179400  | -0.55895100 | C | 1.49300000  | 4.12470000  | -0.50880000 |
| H  | 1.46943300   | 4.41889200  | 1.57739400  | H | 1.94970000  | 4.09390000  | 1.59480000  |
| H  | -0.30640700  | 1.77555800  | -2.20750900 | H | -0.46140000 | 1.87920000  | -2.11390000 |
| H  | 0.84611200   | 3.94089500  | -2.64523200 | H | 0.86520000  | 3.94700000  | -2.55830000 |
| N  | -0.73291500  | 0.63950100  | 0.10894000  | N | -0.74690000 | 0.64030000  | 0.16110000  |
| C  | -0.22297700  | -0.57436700 | 0.53284300  | C | -0.29440000 | -0.60970000 | 0.54420000  |
| C  | -1.29205300  | -1.46191000 | 0.56229900  | C | -1.40500000 | -1.44350000 | 0.54870000  |
| C  | -2.40102700  | -0.68231400 | 0.13702800  | C | -2.47460000 | -0.60020000 | 0.14690000  |
| C  | -3.82463200  | -1.11681800 | 0.00387500  | C | -3.91040000 | -0.97620000 | -0.00180000 |
| O  | -4.16945600  | -2.27662200 | 0.19159200  | O | -4.29550000 | -2.13010000 | 0.14260000  |

|    |             |             |             |    |             |             |             |
|----|-------------|-------------|-------------|----|-------------|-------------|-------------|
| N  | -4.67725400 | -0.10715500 | -0.33494700 | N  | -4.73020000 | 0.07060000  | -0.30400000 |
| C  | 1.18705100  | -0.79622800 | 0.83561900  | C  | 1.10130000  | -0.90520000 | 0.82800000  |
| C  | 1.72328000  | -1.31705700 | 1.98855400  | C  | 1.60390000  | -1.58280000 | 1.91280000  |
| S  | 2.44658900  | -0.49034200 | -0.34039700 | S  | 2.38930000  | -0.44890000 | -0.26500000 |
| C  | 3.12995600  | -1.46598400 | 1.94810400  | C  | 3.00960000  | -1.73810000 | 1.88530000  |
| H  | 1.11659400  | -1.56390500 | 2.84921500  | H  | 0.97360000  | -1.92890000 | 2.72010000  |
| C  | 3.69089400  | -1.05854500 | 0.75793400  | C  | 3.60100000  | -1.17540000 | 0.77550000  |
| H  | 3.72533600  | -1.84727700 | 2.76617300  | H  | 3.58420000  | -2.23140000 | 2.65680000  |
| Cl | 0.19682100  | 2.12076700  | 2.62873900  | Cl | 0.55350000  | 1.87050000  | 2.65250000  |
| Cl | 2.06040700  | 5.81231200  | -0.84660700 | Cl | 2.44820000  | 5.56600000  | -0.80330000 |
| H  | -4.29639300 | 0.81978400  | -0.46277800 | H  | -4.32770000 | 0.99170000  | -0.40080000 |
| N  | -2.05253500 | 0.57434000  | -0.13548300 | N  | -2.06760000 | 0.64690000  | -0.08890000 |
| C  | -6.39441000 | -1.10875500 | -1.67554500 | C  | -6.45220000 | -0.85670000 | -1.68150000 |
| C  | -6.77942300 | -0.60893400 | 0.70167800  | C  | -6.83700000 | -0.43400000 | 0.70890000  |
| C  | -7.89213500 | -1.00167700 | -1.97160700 | C  | -7.94860000 | -0.73250000 | -1.97450000 |
| H  | -6.11919800 | -2.15407200 | -1.47611400 | H  | -6.18370000 | -1.90830000 | -1.50940000 |
| H  | -5.80867100 | -0.76297700 | -2.53068900 | H  | -5.86120000 | -0.48960000 | -2.52390000 |
| C  | -8.28651500 | -0.49021200 | 0.46376100  | C  | -8.34260000 | -0.30050000 | 0.47310000  |
| H  | -6.52286700 | -1.62859400 | 1.02219800  | H  | -6.58440000 | -1.46620000 | 0.98880000  |
| H  | -6.45899400 | 0.08155900  | 1.48542000  | H  | -6.51180000 | 0.22540000  | 1.51700000  |
| C  | -8.72444300 | -1.34779800 | -0.73037400 | C  | -8.77870000 | -1.12410000 | -0.74540000 |
| H  | -8.14241200 | -1.66778100 | -2.80342200 | H  | -8.20140000 | -1.36490000 | -2.83130000 |
| H  | -8.11905300 | 0.02127400  | -2.29224200 | H  | -8.17210000 | 0.30360000  | -2.25250000 |
| H  | -8.81837800 | -0.79102900 | 1.37196200  | H  | -8.87770000 | -0.62310000 | 1.37160000  |
| H  | -8.53465900 | 0.55979100  | 0.27235000  | H  | -8.58440000 | 0.75530000  | 0.30720000  |
| H  | -9.79073000 | -1.20739500 | -0.93260300 | H  | -9.84610000 | -0.98490000 | -0.94180000 |
| H  | -8.58508700 | -2.40814400 | -0.48518300 | H  | -8.62850000 | -2.19000000 | -0.53310000 |
| N  | -6.05835600 | -0.24240100 | -0.53112900 | N  | -6.11270000 | -0.02730000 | -0.51020000 |
| C  | -1.25504700 | -2.92707600 | 0.89331400  | C  | -1.44410000 | -2.92050000 | 0.80950000  |
| H  | -0.35100500 | -3.14015300 | 1.46843500  | H  | -0.54940000 | -3.21490000 | 1.36180000  |
| H  | -2.11310700 | -3.16596300 | 1.52470600  | H  | -2.31240000 | -3.14410000 | 1.43200000  |
| C  | 5.04677200  | -1.04901600 | 0.37719500  | C  | 4.96460000  | -1.12750000 | 0.43110000  |
| C  | 6.20836800  | -1.03435400 | 0.04298000  | C  | 6.13230000  | -1.07490000 | 0.12570000  |
| C  | 7.60679400  | -1.02473400 | -0.36985800 | C  | 7.53530000  | -1.04530000 | -0.26590000 |
| C  | 8.02852700  | -2.23610500 | -1.24195300 | C  | 7.91590000  | -2.10360000 | -1.33340000 |
| H  | 8.24435000  | -0.98832000 | 0.52321400  | H  | 8.16080000  | -1.19660000 | 0.62360000  |
| H  | 7.80357400  | -0.09879200 | -0.92331700 | H  | 7.77770000  | -0.04570000 | -0.64560000 |

|    |             |             |             |   |             |             |             |
|----|-------------|-------------|-------------|---|-------------|-------------|-------------|
| C  | 9.46367400  | -2.04136100 | -1.74536000 | C | 9.37260000  | -1.90420000 | -1.76660000 |
| H  | 7.35840300  | -2.25801900 | -2.10930500 | H | 7.26800000  | -1.93590000 | -2.20180000 |
| H  | 9.76706400  | -2.87137900 | -2.38887400 | H | 9.65060000  | -2.62350000 | -2.54140000 |
| H  | 9.56601400  | -1.11704300 | -2.32153400 | H | 9.54020000  | -0.89920000 | -2.16530000 |
| H  | 10.16982500 | -1.99536800 | -0.90914600 | H | 10.05290000 | -2.04810000 | -0.92000000 |
| C  | 7.87541200  | -3.55830100 | -0.48281200 | C | 7.67680000  | -3.52700000 | -0.81940000 |
| H  | 8.53567900  | -3.58393800 | 0.39123900  | H | 8.30910000  | -3.73350000 | 0.05130000  |
| H  | 6.84996600  | -3.70140400 | -0.13476700 | H | 6.63570000  | -3.67280000 | -0.52270000 |
| H  | 8.13713800  | -4.40595000 | -1.12197100 | H | 7.91830000  | -4.26410000 | -1.59000000 |
| C  | -1.29227700 | -3.82847000 | -0.35278800 | C | -1.53980000 | -3.73810000 | -0.48970000 |
| H  | -2.22071800 | -3.67410500 | -0.90388000 | H | -2.46080000 | -3.49040000 | -1.01860000 |
| H  | -0.44783500 | -3.62033000 | -1.01555300 | H | -0.68700000 | -3.53290000 | -1.14290000 |
| H  | -1.24281200 | -4.88125600 | -0.06127100 | H | -1.55120000 | -4.80890000 | -0.26850000 |
| 21 |             |             |             |   |             |             |             |
| C  | 1.08493300  | 3.74168900  | 0.88400500  | C | 1.34870000  | 3.52190000  | 0.96390000  |
| C  | 0.41985400  | 2.53360400  | 1.07198500  | C | 0.59360000  | 2.36280000  | 1.11250000  |
| C  | -0.09531600 | 1.82867700  | -0.02122500 | C | -0.04330000 | 1.78600000  | 0.00830000  |
| C  | 0.02984100  | 2.37492900  | -1.29847600 | C | 0.05300000  | 2.40890000  | -1.23520000 |
| C  | 0.67649400  | 3.58622800  | -1.50091800 | C | 0.78800000  | 3.57480000  | -1.39590000 |
| C  | 1.20787400  | 4.25319200  | -0.40172700 | C | 1.43980000  | 4.11310000  | -0.29020000 |
| H  | 1.48486400  | 4.27756800  | 1.73299100  | H | 1.84590000  | 3.95820000  | 1.81830000  |
| H  | -0.39069600 | 1.83050300  | -2.13433500 | H | -0.45820000 | 1.95690000  | -2.07530000 |
| H  | 0.77404200  | 4.00350100  | -2.49391000 | H | 0.86570000  | 4.05410000  | -2.36220000 |
| N  | -0.78747700 | 0.59329900  | 0.13197400  | N | -0.79850000 | 0.58740000  | 0.11680000  |
| C  | -0.30378400 | -0.63961800 | 0.53325400  | C | -0.36320000 | -0.68160000 | 0.45470000  |
| C  | -1.38904200 | -1.51061300 | 0.51783100  | C | -1.48340000 | -1.50380000 | 0.40460000  |
| C  | -2.47601200 | -0.70347200 | 0.09019700  | C | -2.53840000 | -0.63370000 | 0.02650000  |
| C  | -3.89324400 | -1.12440700 | -0.12768800 | C | -3.97010000 | -0.99620000 | -0.18220000 |
| O  | -4.27434600 | -2.26474800 | 0.10437300  | O | -4.38650000 | -2.13010000 | 0.02260000  |
| N  | -4.69463400 | -0.12917300 | -0.60554300 | N | -4.74750000 | 0.03650000  | -0.61620000 |
| C  | 1.09427800  | -0.90830000 | 0.83654100  | C | 1.01850000  | -1.01680000 | 0.74820000  |
| C  | 1.58933400  | -1.65298200 | 1.88169800  | C | 1.46550000  | -1.88660000 | 1.71580000  |
| S  | 2.39841500  | -0.38268500 | -0.20767200 | S | 2.36320000  | -0.38490000 | -0.17870000 |
| C  | 2.99609200  | -1.79865500 | 1.86480600  | C | 2.87030000  | -2.04730000 | 1.73240000  |
| H  | 0.95354100  | -2.06330400 | 2.65383200  | H | 0.79520000  | -2.37230000 | 2.41060000  |
| C  | 3.60087300  | -1.16652000 | 0.80114400  | C | 3.51860000  | -1.30000000 | 0.77390000  |
| H  | 3.56057100  | -2.33811900 | 2.61274400  | H | 3.40350000  | -2.67760000 | 2.43020000  |

|    |             |             |             |    |             |             |             |
|----|-------------|-------------|-------------|----|-------------|-------------|-------------|
| Cl | 0.21608000  | 1.94293500  | 2.70154300  | Cl | 0.44800000  | 1.66090000  | 2.70340000  |
| Cl | 2.04177000  | 5.77811800  | -0.63458800 | Cl | 2.39160000  | 5.57480000  | -0.47410000 |
| H  | -4.28975100 | 0.78520800  | -0.74898900 | H  | -4.32470000 | 0.94560000  | -0.73660000 |
| N  | -2.10291000 | 0.55299900  | -0.14543600 | N  | -2.11610000 | 0.61720000  | -0.15390000 |
| C  | -6.34624700 | -1.17968800 | -1.98781800 | C  | -6.45010000 | -0.94630000 | -1.97660000 |
| C  | -6.86899700 | -0.52663200 | 0.32510700  | C  | -6.89690000 | -0.34500000 | 0.36430000  |
| C  | -7.81964100 | -1.06463400 | -2.38532900 | C  | -7.93340000 | -0.80970000 | -2.32550000 |
| H  | -6.10641300 | -2.21526300 | -1.70782400 | H  | -6.21240000 | -1.98850000 | -1.72150000 |
| H  | -5.70027900 | -0.89814400 | -2.82286800 | H  | -5.82480000 | -0.65380000 | -2.82340000 |
| C  | -8.35508200 | -0.39506900 | -0.01603400 | C  | -8.39060000 | -0.19280000 | 0.07100000  |
| H  | -6.65646300 | -1.52908400 | 0.72263900  | H  | -6.68070000 | -1.36050000 | 0.72420000  |
| H  | -6.58340100 | 0.20506000  | 1.08460900  | H  | -6.57950000 | 0.36230000  | 1.13410000  |
| C  | -8.73585700 | -1.31736900 | -1.18119800 | C  | -8.81030000 | -1.09180000 | -1.09890000 |
| H  | -8.03159500 | -1.77688500 | -3.18908300 | H  | -8.17580000 | -1.49650000 | -3.14250000 |
| H  | -8.00351200 | -0.05986100 | -2.78203000 | H  | -8.12210000 | 0.20840000  | -2.68420000 |
| H  | -8.94965500 | -0.62887200 | 0.87278800  | H  | -8.96110000 | -0.43700000 | 0.97250000  |
| H  | -8.56718600 | 0.64534700  | -0.28667900 | H  | -8.59970000 | 0.85370000  | -0.17760000 |
| H  | -9.78394600 | -1.17052000 | -1.45960300 | H  | -9.86730000 | -0.94230000 | -1.33910000 |
| H  | -8.63565300 | -2.36268400 | -0.86316800 | H  | -8.69410000 | -2.14290000 | -0.80620000 |
| N  | -6.06392100 | -0.25031200 | -0.87889200 | N  | -6.12570000 | -0.04320000 | -0.85660000 |
| C  | -1.38837600 | -2.97845800 | 0.83375000  | C  | -1.55020000 | -2.97840000 | 0.66490000  |
| H  | -2.00417100 | -3.49218000 | 0.09324200  | H  | -2.20300000 | -3.43310000 | -0.08220000 |
| H  | -0.36668000 | -3.35695500 | 0.73654100  | H  | -0.55020000 | -3.40440000 | 0.54280000  |
| C  | 4.96971700  | -1.08888200 | 0.48027300  | C  | 4.89800000  | -1.20170000 | 0.51430000  |
| C  | 6.14243000  | -1.01351800 | 0.19763700  | C  | 6.07950000  | -1.10220000 | 0.28270000  |
| C  | 7.55637200  | -0.94724200 | -0.15251100 | C  | 7.50230000  | -1.01450000 | -0.01960000 |
| C  | 8.01109100  | -2.07077600 | -1.10824000 | C  | 7.94880000  | -1.96560000 | -1.14980000 |
| H  | 8.15403800  | -0.98571700 | 0.76643600  | H  | 8.07640000  | -1.23300000 | 0.88910000  |
| H  | 7.76532900  | 0.02754800  | -0.61005500 | H  | 7.74800000  | 0.01860000  | -0.29450000 |
| C  | 9.49908300  | -1.97791100 | -1.46051600 | C  | 9.44620000  | -1.85490000 | -1.45030000 |
| H  | 7.79781700  | -3.03946600 | -0.64409400 | H  | 7.70020000  | -2.99430000 | -0.86840000 |
| H  | 7.40847600  | -2.02535700 | -2.02151200 | H  | 7.37020000  | -1.74210000 | -2.05240000 |
| H  | 9.70321100  | -1.00118300 | -1.91575700 | H  | 9.68540000  | -0.81950000 | -1.72180000 |
| H  | 10.09245500 | -2.01469900 | -0.53884100 | H  | 10.01550000 | -2.07130000 | -0.53800000 |
| C  | -1.93839100 | -3.31038800 | 2.23149800  | C  | -2.10420000 | -3.31300000 | 2.05990000  |
| H  | -1.88899800 | -4.38749400 | 2.41372500  | H  | -2.10920000 | -4.39420000 | 2.22270000  |
| H  | -1.37029000 | -2.80675600 | 3.01913400  | H  | -1.50580000 | -2.85060000 | 2.85050000  |

|    |             |             |             |    |             |             |             |
|----|-------------|-------------|-------------|----|-------------|-------------|-------------|
| H  | -2.98186100 | -3.00205400 | 2.30730500  | H  | -3.12940000 | -2.95030000 | 2.14520000  |
| C  | 9.95917300  | -3.08889900 | -2.40833700 | C  | 9.89500000  | -2.79640000 | -2.57100000 |
| H  | 11.02321500 | -2.99703900 | -2.64145500 | H  | 10.96600000 | -2.70050000 | -2.76820000 |
| H  | 9.79975300  | -4.07708500 | -1.96629100 | H  | 9.69530000  | -3.84040000 | -2.31080000 |
| H  | 9.40783200  | -3.05638400 | -3.35294900 | H  | 9.36310000  | -2.58010000 | -3.50250000 |
| 22 |             |             |             |    |             |             |             |
| C  | 1.21004500  | 2.92195900  | 1.45519900  | C  | 1.38230400  | 2.69977800  | 1.47587100  |
| C  | 0.68980300  | 1.63097000  | 1.46659500  | C  | 0.79154500  | 1.44011600  | 1.45536900  |
| C  | 0.20835300  | 1.04775200  | 0.28936900  | C  | 0.17415800  | 0.96565200  | 0.29281000  |
| C  | 0.21912600  | 1.79528200  | -0.88834700 | C  | 0.12043800  | 1.78764000  | -0.83222100 |
| C  | 0.71987300  | 3.08961400  | -0.91341700 | C  | 0.68927000  | 3.05327600  | -0.82198700 |
| C  | 1.22120800  | 3.63597900  | 0.26367300  | C  | 1.32709200  | 3.49091000  | 0.33506100  |
| H  | 1.58503200  | 3.36291500  | 2.36781000  | H  | 1.86585400  | 3.05710900  | 2.37371000  |
| H  | -0.17327600 | 1.34052300  | -1.78897400 | H  | -0.37348300 | 1.41018100  | -1.71824700 |
| H  | 0.72904800  | 3.66317200  | -1.83032700 | H  | 0.65104000  | 3.68714100  | -1.69736800 |
| N  | -0.33796300 | -0.26630800 | 0.26310300  | N  | -0.41711400 | -0.32353100 | 0.22578900  |
| C  | 0.29275500  | -1.48445400 | 0.44549400  | C  | 0.18444500  | -1.56394500 | 0.33556600  |
| C  | -0.69323600 | -2.45778200 | 0.31811600  | C  | -0.83031700 | -2.50339400 | 0.18347200  |
| C  | -1.87906300 | -1.72458500 | 0.05785300  | C  | -1.99992000 | -1.72911400 | -0.01871000 |
| C  | -3.25382700 | -2.27436900 | -0.16978100 | C  | -3.39365000 | -2.22977400 | -0.24145300 |
| O  | -3.47741000 | -3.46991400 | -0.15939400 | O  | -3.66256800 | -3.41609400 | -0.23722400 |
| N  | -4.18605400 | -1.29222600 | -0.38265500 | N  | -4.28077400 | -1.20811300 | -0.44445500 |
| C  | 1.71840200  | -1.64535200 | 0.68022400  | C  | 1.60602000  | -1.76909700 | 0.53427400  |
| C  | 2.31968600  | -2.51384000 | 1.55787100  | C  | 2.19619000  | -2.74316400 | 1.30203900  |
| S  | 2.93397600  | -0.78573000 | -0.25256900 | S  | 2.82836700  | -0.79972100 | -0.27268900 |
| C  | 3.73479800  | -2.48860800 | 1.50065800  | C  | 3.61140800  | -2.71309200 | 1.26192500  |
| H  | 1.75490700  | -3.13423000 | 2.24000600  | H  | 1.62128000  | -3.43902200 | 1.89665200  |
| C  | 4.24131900  | -1.60348500 | 0.57735800  | C  | 4.12651800  | -1.71788900 | 0.46347700  |
| H  | 4.37232700  | -3.09610000 | 2.13032800  | H  | 4.24413800  | -3.39412000 | 1.81642400  |
| Cl | 0.62380500  | 0.77604500  | 2.98656100  | Cl | 0.82665900  | 0.47959200  | 2.91145500  |
| Cl | 1.87278600  | 5.26457600  | 0.25340000  | Cl | 2.07252000  | 5.07894100  | 0.36418200  |
| H  | -3.86462500 | -0.33155700 | -0.34319400 | H  | -3.91881300 | -0.26475800 | -0.37689400 |
| N  | -1.65442000 | -0.41221300 | 0.01885900  | N  | -1.74110300 | -0.42154100 | -0.00056700 |
| C  | -0.52473400 | -3.94352800 | 0.39006700  | C  | -0.69977200 | -3.99348000 | 0.18589100  |
| H  | -0.79156500 | -4.32516600 | 1.38096100  | H  | -0.88791100 | -4.40342000 | 1.18359600  |
| H  | -1.18902600 | -4.43435800 | -0.31919500 | H  | -1.43869200 | -4.43716800 | -0.47865900 |
| H  | 0.51032700  | -4.22600800 | 0.18657700  | H  | 0.30615600  | -4.29262900 | -0.11761500 |



|    |             |             |             |   |             |             |             |
|----|-------------|-------------|-------------|---|-------------|-------------|-------------|
| C  | -6.44586900 | -1.05750800 | 0.41611500  | C | -6.47194900 | -0.84801200 | 0.44754700  |
| C  | -6.05038600 | -1.09549700 | -1.89147100 | C | -6.16415800 | -0.81991400 | -1.86171700 |
| H  | -5.94849100 | -1.04288700 | 1.38613500  | H | -5.96593300 | -0.96184700 | 1.40632200  |
| H  | -7.29802200 | -1.74116200 | 0.48720000  | H | -7.40630300 | -1.41619400 | 0.48798900  |
| C  | -6.65061400 | 0.30755400  | -1.62691100 | C | -6.54422400 | 0.63967900  | -1.51187300 |
| H  | -6.83426500 | -1.78538400 | -2.22054800 | H | -7.05394600 | -1.38334000 | -2.15915300 |
| H  | -5.25834700 | -1.10908900 | -2.64058200 | H | -5.42441500 | -0.91164400 | -2.65711300 |
| H  | -7.58500200 | 0.42862200  | -2.18055800 | H | -7.46694400 | 0.92666100  | -2.02162500 |
| C  | -6.91571600 | 0.33305300  | -0.07770200 | C | -6.75093400 | 0.62063800  | 0.04600000  |
| C  | -6.13002200 | 1.55536900  | 0.45987100  | C | -5.77131400 | 1.67934400  | 0.61081100  |
| C  | -5.98833700 | 2.48997900  | -0.75166100 | C | -5.52876600 | 2.64548000  | -0.55918400 |
| H  | -5.13631200 | 1.24976900  | 0.80667000  | H | -4.82572400 | 1.21158200  | 0.90546300  |
| H  | -6.62684000 | 2.02643000  | 1.31160000  | H | -6.16409000 | 2.17388700  | 1.50233900  |
| C  | -5.72478800 | 1.51677200  | -1.91140800 | C | -5.45543500 | 1.70945800  | -1.77568900 |
| H  | -6.92820700 | 3.02767200  | -0.92127200 | H | -6.38194400 | 3.32538700  | -0.66391900 |
| H  | -5.20141500 | 3.23886800  | -0.62899900 | H | -4.63313900 | 3.25909200  | -0.43230500 |
| H  | -5.90801400 | 1.95770600  | -2.89447200 | H | -5.60420300 | 2.22680600  | -2.72658200 |
| H  | -4.67399300 | 1.20527000  | -1.89798600 | H | -4.46453600 | 1.24481300  | -1.82482100 |
| H  | -7.98034200 | 0.46704300  | 0.12937000  | H | -7.77546700 | 0.89899800  | 0.30381000  |
| N  | -5.52932700 | -1.60405900 | -0.60615200 | N | -5.64822200 | -1.44427000 | -0.62607500 |
| C  | 5.64326000  | -1.34758300 | 0.30339000  | C | 5.53116000  | -1.43019700 | 0.24300900  |
| C  | 6.15600500  | -0.47734100 | -0.57709600 | C | 6.05289500  | -0.44130000 | -0.49505200 |
| H  | 6.32610400  | -1.94797600 | 0.90202700  | H | 6.20703200  | -2.11350000 | 0.75424200  |
| H  | 5.48148600  | 0.12758300  | -1.18214900 | H | 5.38658700  | 0.24840000  | -1.01203000 |
| C  | 7.62020400  | -0.26626500 | -0.82028500 | C | 7.51833100  | -0.20594500 | -0.69932100 |
| C  | 8.04824600  | -0.58584200 | -2.26586600 | C | 7.94544400  | -0.33838600 | -2.17370200 |
| H  | 8.20370000  | -0.87580500 | -0.12134200 | H | 8.09941700  | -0.90377000 | -0.08595000 |
| H  | 7.87487200  | 0.78162900  | -0.60842600 | H | 7.77628900  | 0.80466900  | -0.35350100 |
| C  | 9.53495500  | -0.32184200 | -2.51770800 | C | 9.43464300  | -0.05278200 | -2.38277100 |
| H  | 7.81353000  | -1.63359600 | -2.48169800 | H | 7.70441100  | -1.34835900 | -2.52213200 |
| H  | 7.44575500  | 0.01214500  | -2.95948000 | H | 7.34746400  | 0.34827600  | -2.78420000 |
| H  | 9.81043700  | -0.55811300 | -3.54882200 | H | 9.71600600  | -0.15500100 | -3.43409300 |
| H  | 9.78709100  | 0.72791200  | -2.33804100 | H | 9.68922400  | 0.96338400  | -2.06565600 |
| H  | 10.16243200 | -0.93016900 | -1.85898800 | H | 10.05323900 | -0.74510700 | -1.80320500 |
| 23 |             |             |             |   |             |             |             |
| C  | 1.33656500  | 3.72481300  | 0.66794300  | C | 1.60290000  | 3.50370000  | 0.75390000  |
| C  | 0.66391000  | 2.54049800  | 0.95501000  | C | 0.83940000  | 2.37020000  | 1.01570000  |

|    |             |             |             |    |             |             |             |
|----|-------------|-------------|-------------|----|-------------|-------------|-------------|
| C  | 0.14556400  | 1.74964700  | -0.07613200 | C  | 0.19090000  | 1.69680000  | -0.02520000 |
| C  | 0.27554400  | 2.18697800  | -1.39420200 | C  | 0.28410000  | 2.19940000  | -1.32230000 |
| C  | 0.93002800  | 3.37315200  | -1.69628400 | C  | 1.02770000  | 3.33830000  | -1.59700000 |
| C  | 1.46458700  | 4.12607300  | -0.65580000 | C  | 1.69130000  | 3.97250000  | -0.55100000 |
| H  | 1.73779300  | 4.32793400  | 1.46993600  | H  | 2.10760000  | 4.01540000  | 1.56070000  |
| H  | -0.14814600 | 1.57732400  | -2.18205300 | H  | -0.23720000 | 1.67490000  | -2.11260000 |
| H  | 1.03072300  | 3.70570200  | -2.72048400 | H  | 1.10250000  | 3.72370000  | -2.60460000 |
| N  | -0.55383900 | 0.53591200  | 0.17855000  | N  | -0.57310000 | 0.52060000  | 0.19910000  |
| C  | -0.07450300 | -0.66477700 | 0.67227200  | C  | -0.14550000 | -0.71580000 | 0.64780000  |
| C  | -1.16318100 | -1.52819500 | 0.72219200  | C  | -1.27010000 | -1.53220000 | 0.66730000  |
| C  | -2.24703300 | -0.75350900 | 0.23470200  | C  | -2.31890000 | -0.69580000 | 0.20710000  |
| C  | -3.66732900 | -1.18518200 | 0.06532200  | C  | -3.75280000 | -1.06610000 | 0.02470000  |
| O  | -4.03945100 | -2.31625500 | 0.34829900  | O  | -4.16890000 | -2.19070000 | 0.27220000  |
| N  | -4.48282100 | -0.20819900 | -0.42830400 | N  | -4.53320000 | -0.04730000 | -0.43850000 |
| C  | 1.31754600  | -0.91557300 | 1.01471700  | C  | 1.23080000  | -1.03420000 | 0.98100000  |
| C  | 1.79487000  | -1.56829100 | 2.12240800  | C  | 1.66590000  | -1.81350000 | 2.02240000  |
| S  | 2.64785900  | -0.49003600 | -0.05002900 | S  | 2.59520000  | -0.50150000 | 0.01200000  |
| C  | 3.20863300  | -1.71729900 | 2.13051800  | C  | 3.07760000  | -1.97690000 | 2.05700000  |
| H  | 1.14812800  | -1.90904400 | 2.91952900  | H  | 0.98870000  | -2.23140000 | 2.75430000  |
| C  | 3.82814800  | -1.18627300 | 1.03260700  | C  | 3.73320000  | -1.32880000 | 1.04680000  |
| H  | 3.75624000  | -2.19189300 | 2.93516900  | H  | 3.59890000  | -2.54610000 | 2.81610000  |
| Cl | 0.45429300  | 2.08979800  | 2.62793600  | Cl | 0.69820000  | 1.82470000  | 2.66720000  |
| Cl | 2.30918800  | 5.62115300  | -1.01388800 | Cl | 2.65520000  | 5.40180000  | -0.87760000 |
| H  | -4.08295700 | 0.69954900  | -0.61948500 | H  | -4.10950000 | 0.85450000  | -0.60200000 |
| N  | -1.86962900 | 0.47986400  | -0.09728000 | N  | -1.88930000 | 0.53230000  | -0.08180000 |
| C  | -6.15119100 | -1.31947100 | -1.74179800 | C  | -6.22460000 | -1.08510000 | -1.77270000 |
| C  | -6.63912600 | -0.57819900 | 0.55174600  | C  | -6.68690000 | -0.39930000 | 0.54150000  |
| C  | -7.63164100 | -1.22752900 | -2.11873300 | C  | -7.70620000 | -0.96650000 | -2.13500000 |
| H  | -5.90098400 | -2.34200700 | -1.42542900 | H  | -5.98520000 | -2.11650000 | -1.47830000 |
| H  | -5.52082400 | -1.06791700 | -2.59810900 | H  | -5.59530000 | -0.82200000 | -2.62610000 |
| C  | -8.13144500 | -0.46803600 | 0.23100500  | C  | -8.17950000 | -0.26400000 | 0.23450000  |
| H  | -6.41367900 | -1.56286600 | 0.98508800  | H  | -6.46860000 | -1.39970000 | 0.94050000  |
| H  | -6.34513800 | 0.18452000  | 1.27672100  | H  | -6.37670000 | 0.33750000  | 1.28610000  |
| C  | -8.52624600 | -1.43747900 | -0.89038000 | C  | -8.58930000 | -1.20690000 | -0.90400000 |
| H  | -7.85291500 | -1.97180700 | -2.89035300 | H  | -7.94170000 | -1.68350000 | -2.92780000 |
| H  | -7.82792400 | -0.24000000 | -2.55123700 | H  | -7.89630000 | 0.03720000  | -2.53160000 |
| H  | -8.70979100 | -0.66963900 | 1.13826300  | H  | -8.75450000 | -0.47710000 | 1.14120000  |

|    |             |             |             |   |             |             |             |
|----|-------------|-------------|-------------|---|-------------|-------------|-------------|
| H  | -8.35419400 | 0.55976100  | -0.07686700 | H | -8.39120000 | 0.77180000  | -0.05360000 |
| H  | -9.57971900 | -1.30729700 | -1.15661300 | H | -9.64550000 | -1.07040000 | -1.15550000 |
| H  | -8.41441900 | -2.46889400 | -0.53323800 | H | -8.47090000 | -2.24600000 | -0.57220000 |
| N  | -5.85547500 | -0.34562700 | -0.67540500 | N | -5.90940000 | -0.14030000 | -0.68510000 |
| C  | -1.17052600 | -2.96263700 | 1.15013800  | C | -1.33710000 | -2.97780000 | 1.04590000  |
| H  | -1.53255000 | -3.06789400 | 2.17788600  | H | -1.64940000 | -3.09790000 | 2.08830000  |
| H  | -1.84587800 | -3.54325200 | 0.52348400  | H | -2.07700000 | -3.49410000 | 0.43680000  |
| H  | -0.16469300 | -3.38476600 | 1.10091500  | H | -0.35930000 | -3.45060000 | 0.92950000  |
| C  | 5.29360700  | -1.16689400 | 0.70662000  | C | 5.20550000  | -1.29100000 | 0.76410000  |
| C  | 5.69934100  | -2.10942000 | -0.44361200 | C | 5.61320000  | -2.05310000 | -0.51040000 |
| H  | 5.83800200  | -1.44851200 | 1.61407800  | H | 5.72260000  | -1.72270000 | 1.62740000  |
| H  | 5.61022400  | -0.14593700 | 0.46309000  | H | 5.54740000  | -0.25210000 | 0.68660000  |
| C  | 7.20667800  | -2.10025700 | -0.71719000 | C | 7.12430000  | -2.03690000 | -0.75330000 |
| H  | 5.37106700  | -3.12623800 | -0.20060700 | H | 5.25790000  | -3.08680000 | -0.43360000 |
| H  | 5.16004200  | -1.82280000 | -1.35370000 | H | 5.09810000  | -1.61550000 | -1.37320000 |
| C  | 7.62428900  | -3.03057500 | -1.86189600 | C | 7.54120000  | -2.78800000 | -2.02210000 |
| H  | 7.52844100  | -1.07641300 | -0.94833000 | H | 7.47190000  | -0.99750000 | -0.81720000 |
| H  | 7.74374500  | -2.38840500 | 0.19590400  | H | 7.63700000  | -2.47660000 | 0.11210000  |
| H  | 7.30147100  | -4.05280700 | -1.63116600 | H | 7.19140000  | -3.82520000 | -1.95730000 |
| H  | 7.08879500  | -2.74179600 | -2.77422100 | H | 7.02880000  | -2.34710000 | -2.88560000 |
| C  | 9.13188800  | -3.01945400 | -2.12981700 | C | 9.05380000  | -2.76960000 | -2.25800000 |
| H  | 9.39599100  | -3.69174500 | -2.95048700 | H | 9.32410000  | -3.31130000 | -3.16830000 |
| H  | 9.47899900  | -2.01659000 | -2.39748700 | H | 9.42390000  | -1.74430000 | -2.35770000 |
| H  | 9.69332500  | -3.33814000 | -1.24602000 | H | 9.58780000  | -3.23360000 | -1.42280000 |
| 24 |             |             |             |   |             |             |             |
| C  | 0.80456600  | 3.36402600  | 1.19600300  | C | 1.01010000  | 3.13150000  | 1.31140000  |
| C  | 0.41174600  | 2.03671500  | 1.34291600  | C | 0.53950000  | 1.82520000  | 1.40470000  |
| C  | 0.02972200  | 1.28050700  | 0.22939600  | C | 0.01730000  | 1.17790000  | 0.27950000  |
| C  | 0.00894700  | 1.88937100  | -1.02545300 | C | -0.06430000 | 1.87240000  | -0.92690000 |
| C  | 0.38289200  | 3.21634400  | -1.18700900 | C | 0.38450000  | 3.18120000  | -1.03180000 |
| C  | 0.78802700  | 3.93800600  | -0.06885400 | C | 0.93000000  | 3.79360000  | 0.09260000  |
| H  | 1.10246800  | 3.93969600  | 2.06075400  | H | 1.41920000  | 3.62360000  | 2.18210000  |
| H  | -0.30614700 | 1.29993500  | -1.87705300 | H | -0.48430000 | 1.36120000  | -1.78350000 |
| H  | 0.36857500  | 3.68187000  | -2.16314500 | H | 0.32480000  | 3.71610000  | -1.96980000 |
| N  | -0.38412500 | -0.07657300 | 0.34145100  | N | -0.45160000 | -0.16120000 | 0.32970000  |
| C  | 0.36015300  | -1.19598400 | 0.66901400  | C | 0.25550000  | -1.32120000 | 0.58690000  |
| C  | -0.51819000 | -2.27322700 | 0.63288200  | C | -0.66040000 | -2.36340000 | 0.49620000  |

|    |             |             |             |    |             |             |             |
|----|-------------|-------------|-------------|----|-------------|-------------|-------------|
| C  | -1.76399600 | -1.69903700 | 0.27158900  | C  | -1.88620000 | -1.72870000 | 0.17450000  |
| C  | -3.06856100 | -2.41024000 | 0.08423500  | C  | -3.21610000 | -2.38120000 | -0.04250000 |
| O  | -3.17039000 | -3.61357300 | 0.22952600  | O  | -3.37410000 | -3.58140000 | 0.07730000  |
| N  | -4.08814600 | -1.56065100 | -0.25931200 | N  | -4.18430000 | -1.47610000 | -0.38310000 |
| C  | 1.78839200  | -1.17904000 | 0.94826600  | C  | 1.68060000  | -1.36780000 | 0.85710000  |
| C  | 2.44502600  | -1.83892100 | 1.95523300  | C  | 2.32060000  | -2.18010000 | 1.75810000  |
| S  | 2.94664900  | -0.35361200 | -0.08237900 | S  | 2.85170000  | -0.39620000 | -0.02030000 |
| C  | 3.85711300  | -1.67863600 | 1.91526300  | C  | 3.73340000  | -2.02270000 | 1.75970000  |
| H  | 1.92341200  | -2.40341000 | 2.71617300  | H  | 1.78430000  | -2.84920000 | 2.41650000  |
| C  | 4.29757100  | -0.90072300 | 0.87994400  | C  | 4.18660000  | -1.09430000 | 0.86360000  |
| H  | 4.53018500  | -2.11517700 | 2.64259000  | H  | 4.39880000  | -2.56980000 | 2.41530000  |
| Cl | 0.37460900  | 1.35528900  | 2.94916900  | Cl | 0.60000000  | 1.02720000  | 2.95510000  |
| Cl | 1.27926100  | 5.61239100  | -0.25014300 | Cl | 1.52330000  | 5.44110000  | -0.02110000 |
| H  | -3.86557100 | -0.57400200 | -0.32816600 | H  | -3.91460000 | -0.50010000 | -0.40200000 |
| N  | -1.67155800 | -0.38266400 | 0.09020800  | N  | -1.74970000 | -0.40710000 | 0.06660000  |
| C  | -0.20229600 | -3.71623600 | 0.87509600  | C  | -0.39330000 | -3.82630000 | 0.65780000  |
| H  | -0.49404100 | -4.02139100 | 1.88504200  | H  | -0.60770000 | -4.15500000 | 1.67980000  |
| H  | -0.76310600 | -4.34839800 | 0.18827200  | H  | -1.04310000 | -4.40300000 | 0.00200000  |
| H  | 0.86771800  | -3.90157600 | 0.76062600  | H  | 0.65380000  | -4.05190000 | 0.44290000  |
| C  | -6.38387800 | -1.45252000 | 0.45853200  | C  | -6.43370000 | -1.23340000 | 0.39610000  |
| C  | -5.91411200 | -1.74819100 | -1.81594300 | C  | -6.03640000 | -1.42540000 | -1.89160000 |
| H  | -5.92139900 | -1.26372900 | 1.42757300  | H  | -5.95850000 | -1.19320000 | 1.37630000  |
| H  | -7.16831500 | -2.20257000 | 0.60243400  | H  | -7.31240000 | -1.88130000 | 0.47190000  |
| C  | -6.65364900 | -0.38908400 | -1.74952100 | C  | -6.56410000 | 0.01980000  | -1.71830000 |
| H  | -6.61786400 | -2.54896800 | -2.06533400 | H  | -6.85730000 | -2.10090000 | -2.15130000 |
| H  | -5.10152000 | -1.78026900 | -2.54209200 | H  | -5.25950000 | -1.53060000 | -2.64890000 |
| H  | -7.57719100 | -0.43302300 | -2.33213300 | H  | -7.48800000 | 0.15950000  | -2.28450000 |
| C  | -6.96935500 | -0.19072200 | -0.22242800 | C  | -6.83140000 | 0.14940000  | -0.17490000 |
| C  | -6.32269700 | 1.16287900  | 0.16496600  | C  | -5.97850000 | 1.35300000  | 0.29760000  |
| C  | -6.23162600 | 1.94262500  | -1.15609800 | C  | -5.77920000 | 2.20570000  | -0.96510000 |
| H  | -5.31623200 | 1.00516400  | 0.56899200  | H  | -5.00630000 | 1.01410000  | 0.67150000  |
| H  | -6.89021300 | 1.68826200  | 0.93702600  | H  | -6.45180000 | 1.90080000  | 1.11590000  |
| C  | -5.83868300 | 0.85880100  | -2.17225300 | C  | -5.56940000 | 1.15500000  | -2.06660000 |
| H  | -7.21254900 | 2.35826600  | -1.41354300 | H  | -6.68690000 | 2.78440000  | -1.17100000 |
| H  | -5.52425800 | 2.77525900  | -1.11748400 | H  | -4.95050000 | 2.91340000  | -0.88030000 |
| H  | -6.03109500 | 1.14895300  | -3.20821600 | H  | -5.72640000 | 1.54950000  | -3.07340000 |
| H  | -4.76401200 | 0.65691400  | -2.09707500 | H  | -4.53860000 | 0.78560000  | -2.03310000 |

|    |             |             |             |   |             |             |             |
|----|-------------|-------------|-------------|---|-------------|-------------|-------------|
| H  | -8.04801300 | -0.13797500 | -0.05514900 | H | -7.88710000 | 0.35340000  | 0.01910000  |
| N  | -5.38694500 | -2.03218200 | -0.46546300 | N | -5.51570000 | -1.85980000 | -0.57910000 |
| C  | 5.70844200  | -0.52540500 | 0.52952600  | C | 5.60070000  | -0.68050000 | 0.58450000  |
| C  | 6.24777800  | -1.20582500 | -0.74403000 | C | 6.11710000  | -1.12380000 | -0.79700000 |
| H  | 6.34328300  | -0.79492700 | 1.38012700  | H | 6.23530000  | -1.11190000 | 1.36560000  |
| H  | 5.79045100  | 0.56217700  | 0.41779800  | H | 5.69880000  | 0.40800000  | 0.67250000  |
| C  | 7.70354700  | -0.83612300 | -1.04580600 | C | 7.57570000  | -0.72860000 | -1.03920000 |
| H  | 6.15488900  | -2.29184500 | -0.63160300 | H | 6.00430000  | -2.21020000 | -0.88500000 |
| H  | 5.61593800  | -0.93111600 | -1.59643400 | H | 5.48360000  | -0.68590000 | -1.57690000 |
| C  | 8.25177600  | -1.50286100 | -2.31273500 | C | 8.09960000  | -1.15980000 | -2.41290000 |
| H  | 7.78911300  | 0.25383500  | -1.14543500 | H | 7.68010000  | 0.35950000  | -0.93730000 |
| H  | 8.33391300  | -1.11321800 | -0.19077300 | H | 8.20710000  | -1.16940000 | -0.25680000 |
| H  | 8.16524800  | -2.59143000 | -2.21308400 | H | 7.99270000  | -2.24640000 | -2.51370000 |
| H  | 7.62248100  | -1.22531900 | -3.16681700 | H | 7.46860000  | -0.71790000 | -3.19340000 |
| C  | 9.70739800  | -1.13137100 | -2.60929500 | C | 9.55980000  | -0.76320000 | -2.64730000 |
| H  | 10.36697400 | -1.42867200 | -1.78804700 | H | 10.21580000 | -1.21810000 | -1.89840000 |
| H  | 10.06709200 | -1.62215500 | -3.51758400 | H | 9.90840000  | -1.08200000 | -3.63320000 |
| H  | 9.81985300  | -0.05163700 | -2.74864400 | H | 9.68790000  | 0.32190000  | -2.58300000 |
| 25 |             |             |             |   |             |             |             |
| C  | 2.06849600  | 3.20243400  | 0.91342200  | C | 2.25480000  | 3.00760000  | 0.94850000  |
| C  | 1.29293600  | 2.05669900  | 1.06438900  | C | 1.41140000  | 1.90900000  | 1.08050000  |
| C  | 0.62201600  | 1.50332100  | -0.03157700 | C | 0.63730000  | 1.47610000  | -0.00170000 |
| C  | 0.70741800  | 2.14039300  | -1.26944200 | C | 0.68960000  | 2.18320000  | -1.20200000 |
| C  | 1.46406900  | 3.29244200  | -1.43303400 | C | 1.51280000  | 3.29120000  | -1.34400000 |
| C  | 2.14713300  | 3.80614400  | -0.33531300 | C | 2.29800000  | 3.68450000  | -0.26420000 |
| H  | 2.58815800  | 3.62067600  | 1.76366300  | H | 2.85710000  | 3.33230000  | 1.78470000  |
| H  | 0.16714800  | 1.71474600  | -2.10541000 | H | 0.07270000  | 1.84320000  | -2.02380000 |
| H  | 1.52976100  | 3.78055900  | -2.39589300 | H | 1.55580000  | 3.83570000  | -2.27730000 |
| N  | -0.18679100 | 0.33698500  | 0.08586500  | N | -0.21360000 | 0.34190000  | 0.08810000  |
| C  | 0.18953600  | -0.96957400 | 0.34318700  | C | 0.12890000  | -0.98240000 | 0.29210000  |
| C  | -0.98207800 | -1.71923200 | 0.35347800  | C | -1.06250000 | -1.69890000 | 0.28190000  |
| C  | -2.00463200 | -0.77224500 | 0.08947400  | C | -2.06010000 | -0.71570000 | 0.06000000  |
| C  | -3.47307100 | -1.02789000 | -0.02084800 | C | -3.53270000 | -0.93380000 | -0.04740000 |
| O  | -3.94787400 | -2.14788400 | 0.11266700  | O | -4.03270000 | -2.04620000 | 0.05930000  |
| N  | -4.20670100 | 0.09276200  | -0.28233200 | N | -4.24610000 | 0.20660000  | -0.27440000 |
| C  | 1.56498100  | -1.40990100 | 0.51715000  | C | 1.49020000  | -1.46120000 | 0.44350000  |
| C  | 2.03126500  | -2.31047700 | 1.44684300  | C | 1.91730000  | -2.45630000 | 1.29240000  |

|    |             |             |             |    |             |             |             |
|----|-------------|-------------|-------------|----|-------------|-------------|-------------|
| S  | 2.85971200  | -0.91162100 | -0.55134500 | S  | 2.82250000  | -0.86360000 | -0.52290000 |
| C  | 3.41064400  | -2.59727600 | 1.32355200  | C  | 3.29850000  | -2.74020000 | 1.18800000  |
| H  | 1.39656600  | -2.73396500 | 2.21295700  | H  | 1.25150000  | -2.94610000 | 1.98890000  |
| C  | 4.02204900  | -1.91964400 | 0.29216900  | C  | 3.94790000  | -1.96410000 | 0.25350000  |
| H  | 3.95271800  | -3.26953900 | 1.97416300  | H  | 3.81600000  | -3.47900000 | 1.78380000  |
| Cl | 1.15323100  | 1.35194500  | 2.65488600  | Cl | 1.33260000  | 1.09920000  | 2.62420000  |
| Cl | 3.12086500  | 5.25258400  | -0.52113900 | Cl | 3.36140000  | 5.06970000  | -0.42730000 |
| H  | -3.72253400 | 0.97568900  | -0.36284700 | H  | -3.75310000 | 1.08590000  | -0.33210000 |
| N  | -1.51674000 | 0.45583300  | -0.07682200 | N  | -1.54020000 | 0.50520000  | -0.06390000 |
| C  | -6.07537200 | -0.61553600 | -1.60544800 | C  | -6.12900000 | -0.45950000 | -1.58930000 |
| C  | -6.31830100 | -0.21875900 | 0.80956900  | C  | -6.33960000 | -0.12210000 | 0.83590000  |
| C  | -7.55854000 | -0.31577400 | -1.83459200 | C  | -7.61630000 | -0.16230000 | -1.78970000 |
| H  | -5.92021800 | -1.69604300 | -1.47624000 | H  | -5.96750000 | -1.54110000 | -1.48100000 |
| H  | -5.48117700 | -0.28984900 | -2.46263200 | H  | -5.54650000 | -0.11430000 | -2.44680000 |
| C  | -7.80740800 | 0.09066600  | 0.63947100  | C  | -7.83190000 | 0.18320000  | 0.69360000  |
| H  | -6.17530200 | -1.27896300 | 1.06199100  | H  | -6.18730000 | -1.18840000 | 1.05380000  |
| H  | -5.89172200 | 0.38070800  | 1.61730300  | H  | -5.90260000 | 0.45650000  | 1.65320000  |
| C  | -8.38449000 | -0.63588300 | -0.58214800 | C  | -8.41870000 | -0.52560000 | -0.53370000 |
| H  | -7.91428000 | -0.89651400 | -2.69160000 | H  | -7.98110000 | -0.71960000 | -2.65820000 |
| H  | -7.67211500 | 0.74420800  | -2.08817300 | H  | -7.73980000 | 0.90450000  | -2.00730000 |
| H  | -8.34096600 | -0.19963000 | 1.55010500  | H  | -8.35130000 | -0.12620000 | 1.60600000  |
| H  | -7.93417000 | 1.17219700  | 0.51715500  | H  | -7.96520000 | 1.26590000  | 0.58990000  |
| H  | -9.43246700 | -0.35918300 | -0.73306600 | H  | -9.47330000 | -0.26360000 | -0.66180000 |
| H  | -8.36489200 | -1.71810300 | -0.40243600 | H  | -8.37500000 | -1.61100000 | -0.37900000 |
| N  | -5.59990900 | 0.13437300  | -0.42871100 | N  | -5.64010000 | 0.26750000  | -0.40300000 |
| C  | -1.11983800 | -3.19698200 | 0.54965300  | C  | -1.23690000 | -3.17770000 | 0.42530000  |
| H  | -1.39277000 | -3.43589200 | 1.58264300  | H  | -1.46280000 | -3.44870000 | 1.46180000  |
| H  | -1.91631900 | -3.59035200 | -0.07987500 | H  | -2.07700000 | -3.51850000 | -0.17690000 |
| H  | -0.18173000 | -3.70710100 | 0.32143600  | H  | -0.32640000 | -3.70340000 | 0.12930000  |
| C  | 5.37162800  | -1.94974600 | -0.10843000 | C  | 5.30970000  | -1.96280000 | -0.10080000 |
| C  | 6.52813600  | -1.96642500 | -0.45903800 | C  | 6.47660000  | -1.94580000 | -0.41270000 |
| C  | 7.92100700  | -2.00758700 | -0.89144600 | C  | 7.87940000  | -1.95060000 | -0.81150000 |
| C  | 8.19628900  | -3.06759100 | -1.97475300 | C  | 8.14440000  | -2.77500000 | -2.08610000 |
| H  | 8.55732300  | -2.19751500 | -0.01949100 | H  | 8.48210000  | -2.34340000 | 0.01540000  |
| H  | 8.20526500  | -1.01693700 | -1.26445500 | H  | 8.20910000  | -0.91660000 | -0.96500000 |
| H  | 9.25140500  | -3.05265200 | -2.25898600 | H  | 9.20640000  | -2.74620000 | -2.34250000 |
| H  | 7.95160300  | -4.06748000 | -1.61081300 | H  | 7.85180000  | -3.81700000 | -1.94070000 |

|    |             |             |             |    |             |             |             |
|----|-------------|-------------|-------------|----|-------------|-------------|-------------|
| H  | 7.59645700  | -2.87616400 | -2.86674400 | H  | 7.57460000  | -2.37810000 | -2.92880000 |
| 26 |             |             |             |    |             |             |             |
| C  | 1.48032400  | 3.04206700  | 1.17589600  | C  | 1.62410900  | 2.86577500  | 1.19522300  |
| C  | 1.00334800  | 1.73610400  | 1.24004800  | C  | 1.08950600  | 1.58194600  | 1.23884500  |
| C  | 0.46908400  | 1.11754400  | 0.10435900  | C  | 0.42796400  | 1.05155300  | 0.12574500  |
| C  | 0.38395400  | 1.84340300  | -1.08376700 | C  | 0.27475800  | 1.84016900  | -1.01389000 |
| C  | 0.84092000  | 3.15183700  | -1.16040600 | C  | 0.78674800  | 3.12880000  | -1.06649600 |
| C  | 1.39540000  | 3.73464500  | -0.02537400 | C  | 1.46856400  | 3.62391200  | 0.04125500  |
| H  | 1.89678100  | 3.51060700  | 2.05620000  | H  | 2.14192100  | 3.26683900  | 2.05465700  |
| H  | -0.04793300 | 1.36077900  | -1.95123200 | H  | -0.25153700 | 1.41891500  | -1.86068400 |
| H  | 0.77635100  | 3.70855700  | -2.08539800 | H  | 0.67141700  | 3.73706800  | -1.95317400 |
| N  | -0.03504200 | -0.21350900 | 0.13398200  | N  | -0.11161300 | -0.26208700 | 0.12555400  |
| C  | 0.64669600  | -1.40704200 | 0.29158100  | C  | 0.54719200  | -1.47312700 | 0.23026400  |
| C  | -0.31162100 | -2.41426800 | 0.24802700  | C  | -0.43333600 | -2.45754600 | 0.16678300  |
| C  | -1.53659300 | -1.72455100 | 0.05921400  | C  | -1.64516200 | -1.73767900 | 0.01837400  |
| C  | -2.90419400 | -2.32342500 | -0.06374700 | C  | -3.02739500 | -2.30161500 | -0.10122700 |
| O  | -3.08466100 | -3.52542900 | -0.01910600 | O  | -3.24378200 | -3.49729100 | -0.04529700 |
| N  | -3.88211000 | -1.37696200 | -0.22635300 | N  | -3.96825500 | -1.32420000 | -0.27771300 |
| C  | 2.09064200  | -1.51603100 | 0.42996200  | C  | 1.98661100  | -1.61343500 | 0.34547200  |
| C  | 2.77670800  | -2.34396400 | 1.28820200  | C  | 2.65937400  | -2.53788000 | 1.11097900  |
| S  | 3.20789900  | -0.64525400 | -0.59965900 | S  | 3.11482900  | -0.62985800 | -0.56349400 |
| C  | 4.18202100  | -2.28193000 | 1.14165300  | C  | 4.06605400  | -2.46274600 | 0.98912000  |
| H  | 2.27642300  | -2.96256900 | 2.02041700  | H  | 2.14620600  | -3.23155200 | 1.76190000  |
| C  | 4.59372800  | -1.40409200 | 0.16360900  | C  | 4.48909500  | -1.47745400 | 0.12459500  |
| H  | 4.88153300  | -2.85057000 | 1.73867200  | H  | 4.75918500  | -3.09694700 | 1.52399200  |
| Cl | 1.05899500  | 0.90594900  | 2.77419400  | Cl | 1.24937400  | 0.66206000  | 2.71289900  |
| Cl | 1.99225400  | 5.38194100  | -0.10183100 | Cl | 2.14147500  | 5.24302100  | -0.00971900 |
| H  | -3.59222800 | -0.40552100 | -0.22612800 | H  | -3.64345800 | -0.36515500 | -0.26154700 |
| N  | -1.35922600 | -0.40649500 | -0.01526400 | N  | -1.44138000 | -0.42070600 | -0.01356900 |
| C  | -0.08879400 | -3.89225500 | 0.33171300  | C  | -0.24013800 | -3.94048000 | 0.20005300  |
| H  | -0.28387200 | -4.26553400 | 1.34224300  | H  | -0.35809700 | -4.32976200 | 1.21655300  |
| H  | -0.77701000 | -4.41664500 | -0.32911600 | H  | -0.99427500 | -4.43208300 | -0.41163100 |
| H  | 0.94108600  | -4.14439000 | 0.07056300  | H  | 0.75954500  | -4.20735900 | -0.15030900 |
| C  | -6.08932500 | -1.20327400 | 0.72098600  | C  | -6.11006600 | -1.01471500 | 0.74271000  |
| C  | -5.84971900 | -1.26905900 | -1.60724000 | C  | -5.95380500 | -1.06812000 | -1.58139600 |
| H  | -5.52836700 | -1.15532600 | 1.65456300  | H  | -5.53846600 | -1.06926400 | 1.66931800  |
| H  | -6.91099200 | -1.91320500 | 0.86023600  | H  | -7.01508900 | -1.61717600 | 0.86690900  |

|    |             |             |             |   |             |             |             |
|----|-------------|-------------|-------------|---|-------------|-------------|-------------|
| C  | -6.47593700 | 0.11881200  | -1.32404600 | C | -6.37080100 | 0.38834400  | -1.26268100 |
| H  | -6.63118500 | -1.98923700 | -1.87051500 | H | -6.83669200 | -1.67757900 | -1.79749100 |
| H  | -5.11063400 | -1.27122200 | -2.40877100 | H | -5.26395200 | -1.16312100 | -2.42005500 |
| H  | -7.44841400 | 0.20145600  | -1.81569700 | H | -7.33542800 | 0.61844400  | -1.72111900 |
| C  | -6.63827600 | 0.16227700  | 0.23894800  | C | -6.47610900 | 0.42430100  | 0.30503600  |
| C  | -5.86084600 | 1.41891700  | 0.70447600  | C | -5.50815400 | 1.54355200  | 0.76358900  |
| C  | -5.82986700 | 2.33608600  | -0.52817400 | C | -5.38174800 | 2.46963900  | -0.45602500 |
| H  | -4.83691200 | 1.15209500  | 0.98998700  | H | -4.52668300 | 1.12643900  | 1.01375000  |
| H  | -6.31664900 | 1.88866400  | 1.57954000  | H | -5.86399600 | 2.05826600  | 1.65918500  |
| C  | -5.61054900 | 1.35145100  | -1.68747300 | C | -5.34651200 | 1.48807400  | -1.63779500 |
| H  | -6.79610900 | 2.84028200  | -0.64380100 | H | -6.26782500 | 3.11027200  | -0.53087100 |
| H  | -5.06186400 | 3.11185900  | -0.46932500 | H | -4.50665100 | 3.12308900  | -0.41156900 |
| H  | -5.87160400 | 1.76889700  | -2.66317000 | H | -5.57665800 | 1.95961600  | -2.59624900 |
| H  | -4.55137800 | 1.07386100  | -1.73805300 | H | -4.34217100 | 1.06093900  | -1.73309300 |
| H  | -7.69076400 | 0.26432600  | 0.51476900  | H | -7.49284600 | 0.67178700  | 0.61898700  |
| N  | -5.22582600 | -1.73752000 | -0.35273700 | N | -5.33343100 | -1.62127100 | -0.35986300 |
| C  | 5.90342100  | -1.08091600 | -0.24021000 | C | 5.80277400  | -1.11183800 | -0.22266700 |
| C  | 7.02341400  | -0.79497200 | -0.59318900 | C | 6.92463600  | -0.78267100 | -0.52687200 |
| C  | 8.37737300  | -0.47122700 | -1.02998800 | C | 8.27923500  | -0.41003300 | -0.91794200 |
| H  | 9.05333900  | -0.53920200 | -0.16988500 | H | 8.97081900  | -0.69336600 | -0.11625700 |
| H  | 8.40378900  | 0.57531300  | -1.35459500 | H | 8.33824000  | 0.68146200  | -0.99999000 |
| C  | 8.88957600  | -1.37856700 | -2.16459900 | C | 8.72682500  | -1.05561400 | -2.24359700 |
| H  | 9.90441800  | -1.09075100 | -2.45021200 | H | 9.74489000  | -0.74521000 | -2.49194400 |
| H  | 8.90367400  | -2.42386300 | -1.84953800 | H | 8.70555800  | -2.14486200 | -2.16991500 |
| H  | 8.24830900  | -1.29930400 | -3.04470400 | H | 8.06602500  | -0.75883600 | -3.06070600 |
| 27 |             |             |             |   |             |             |             |
| C  | 1.51518700  | 3.09818200  | 1.13563100  | C | 1.69900000  | 2.92620000  | 1.16990000  |
| C  | 0.97256100  | 1.81891400  | 1.21410500  | C | 1.09370000  | 1.67540000  | 1.23970000  |
| C  | 0.40819700  | 1.21545200  | 0.08491000  | C | 0.39140000  | 1.16570000  | 0.14200000  |
| C  | 0.36015400  | 1.93118700  | -1.11137100 | C | 0.27010000  | 1.94380000  | -1.00860000 |
| C  | 0.88295600  | 3.21376300  | -1.20234300 | C | 0.85310000  | 3.20050000  | -1.08730000 |
| C  | 1.46605900  | 3.78044700  | -0.07350700 | C | 1.57390000  | 3.67360000  | 0.00530000  |
| H  | 1.95436900  | 3.55501900  | 2.01102500  | H | 2.24790000  | 3.31090000  | 2.01750000  |
| H  | -0.09608800 | 1.46152800  | -1.97345700 | H | -0.28890000 | 1.53990000  | -1.84280000 |
| H  | 0.84669500  | 3.76266500  | -2.13352300 | H | 0.76230000  | 3.80040000  | -1.98240000 |
| N  | -0.16266500 | -0.08810000 | 0.12877500  | N | -0.21770000 | -0.11700000 | 0.16790000  |
| C  | 0.45799300  | -1.31256200 | 0.30229800  | C | 0.38000000  | -1.35900000 | 0.27870000  |



|    |             |             |             |    |             |             |             |
|----|-------------|-------------|-------------|----|-------------|-------------|-------------|
| C  | -0.54959900 | -2.27060800 | 0.26656300  | C  | -0.64900000 | -2.29280000 | 0.22920000  |
| C  | -1.73772300 | -1.52195700 | 0.06547400  | C  | -1.82440000 | -1.51300000 | 0.08380000  |
| C  | -3.13213100 | -2.05185600 | -0.05526600 | C  | -3.23110000 | -2.00800000 | -0.03100000 |
| O  | -3.37420700 | -3.24311400 | 0.00262700  | O  | -3.49590000 | -3.19480000 | -0.08470000 |
| N  | -4.06854900 | -1.06497800 | -0.23096800 | N  | -4.15000000 | -0.99230000 | -0.06860000 |
| C  | 1.89415600  | -1.49254400 | 0.44751900  | C  | 1.81140000  | -1.57130000 | 0.38540000  |
| C  | 2.53459100  | -2.34381500 | 1.31811700  | C  | 2.44230000  | -2.51600000 | 1.16160000  |
| S  | 3.05756300  | -0.69087700 | -0.58710100 | S  | 2.98060000  | -0.66390000 | -0.55050000 |
| C  | 3.94177400  | -2.35406400 | 1.17694700  | C  | 3.84990000  | -2.51650000 | 1.02650000  |
| H  | 2.00121500  | -2.92779600 | 2.05539500  | H  | 1.89980000  | -3.17050000 | 1.82910000  |
| C  | 4.40067400  | -1.50928100 | 0.19083000  | C  | 4.31530000  | -1.56990000 | 0.14080000  |
| H  | 4.60963000  | -2.95001000 | 1.78350700  | H  | 4.51410000  | -3.17660000 | 1.56670000  |
| Cl | 0.98501100  | 1.00473700  | 2.75777500  | Cl | 1.21830000  | 0.77100000  | 2.72670000  |
| Cl | 2.14585800  | 5.39430300  | -0.16804800 | Cl | 2.33660000  | 5.25100000  | -0.07900000 |
| H  | -3.74145700 | -0.10436700 | -0.24319200 | H  | -3.79650000 | -0.04120000 | -0.07620000 |
| N  | -1.49400600 | -0.21552000 | -0.02330900 | N  | -1.55440000 | -0.20850000 | 0.03780000  |
| C  | -0.40152000 | -3.75685700 | 0.36749100  | C  | -0.52920000 | -3.78330000 | 0.27280000  |
| H  | -0.61795900 | -4.10859000 | 1.38141100  | H  | -0.67380000 | -4.16040000 | 1.29060000  |
| H  | -1.11296800 | -4.25370700 | -0.29002800 | H  | -1.30120000 | -4.24000000 | -0.34350000 |
| C  | -6.23923100 | -1.00077100 | 0.79705800  | C  | -6.35430000 | -0.77040000 | 0.82200000  |
| C  | -5.97477500 | -1.06960600 | -1.67966200 | C  | -5.95520000 | -0.96600000 | -1.63040000 |
| C  | -6.43359900 | 0.49584100  | 1.08940400  | C  | -6.43650000 | 0.74960000  | 1.03430000  |
| H  | -7.21664300 | -1.46730900 | 0.63306700  | H  | -7.35640000 | -1.16270000 | 0.61940000  |
| H  | -5.79970800 | -1.49301900 | 1.66879300  | H  | -6.00370000 | -1.25320000 | 1.73810000  |
| C  | -5.81716500 | 0.36528200  | -2.23495200 | C  | -5.60370000 | 0.41350000  | -2.22820000 |
| H  | -7.03613800 | -1.32339500 | -1.61300100 | H  | -7.03970000 | -1.10120000 | -1.61860000 |
| H  | -5.53339500 | -1.77179900 | -2.39415500 | H  | -5.55040000 | -1.74620000 | -2.28290000 |
| C  | -6.98359900 | 1.32636800  | -0.08221400 | C  | -6.83920000 | 1.55780000  | -0.21090000 |
| H  | -5.48135600 | 0.93327200  | 1.41547800  | H  | -5.47060000 | 1.12090000  | 1.39960000  |
| H  | -7.11061600 | 0.57813700  | 1.94819600  | H  | -7.15460000 | 0.93300000  | 1.84220000  |
| C  | -5.97520500 | 1.52686400  | -1.22868400 | C  | -5.73880000 | 1.63090000  | -1.28610000 |
| H  | -6.55566800 | 0.47429600  | -3.03769500 | H  | -6.24820000 | 0.55250000  | -3.10350000 |
| H  | -4.83951800 | 0.46058100  | -2.71866900 | H  | -4.57910000 | 0.38640000  | -2.61260000 |
| H  | -7.91091600 | 0.87798200  | -0.46180900 | H  | -7.76440000 | 1.15210000  | -0.63980000 |
| H  | -7.26389300 | 2.31268100  | 0.30216600  | H  | -7.07610000 | 2.57840000  | 0.10650000  |
| H  | -6.24751800 | 2.42392200  | -1.79403600 | H  | -5.89890000 | 2.51920000  | -1.90500000 |
| H  | -5.00097500 | 1.75795600  | -0.77913400 | H  | -4.78360000 | 1.80810000  | -0.77550000 |

|    |             |             |             |    |             |             |             |
|----|-------------|-------------|-------------|----|-------------|-------------|-------------|
| C  | 5.72650600  | -1.25670400 | -0.21063700 | C  | 5.64290000  | -1.27980000 | -0.22440000 |
| C  | 6.86090100  | -1.03127500 | -0.56144500 | C  | 6.77740000  | -1.01540000 | -0.54460000 |
| C  | 8.23136800  | -0.78083500 | -0.99491700 | C  | 8.14590000  | -0.72220000 | -0.95450000 |
| C  | 8.70809500  | -1.73623300 | -2.10526700 | C  | 8.55620000  | -1.44030000 | -2.25470000 |
| H  | 8.89777300  | -0.86091700 | -0.12840800 | H  | 8.82770000  | -1.00530000 | -0.14440000 |
| H  | 8.30875100  | 0.25580100  | -1.34232600 | H  | 8.25500000  | 0.36120000  | -1.08030000 |
| H  | 8.67109000  | -2.77374800 | -1.76716900 | H  | 8.48480000  | -2.52350000 | -2.13740000 |
| H  | 8.07719200  | -1.64679800 | -2.99186100 | H  | 7.90570000  | -1.14580000 | -3.08090000 |
| H  | 9.73721300  | -1.50258500 | -2.38923700 | H  | 9.58630000  | -1.18780000 | -2.51860000 |
| H  | 0.61520000  | -4.06315400 | 0.11282500  | H  | 0.45910000  | -4.10070000 | -0.06710000 |
| N  | -5.41852100 | -1.35874400 | -0.36070000 | N  | -5.50080000 | -1.24190000 | -0.26760000 |
| 28 |             |             |             |    |             |             |             |
| C  | 1.08493300  | 3.74168900  | 0.88400500  | C  | 1.34870000  | 3.52190000  | 0.96390000  |
| C  | 0.41985400  | 2.53360400  | 1.07198500  | C  | 0.59360000  | 2.36280000  | 1.11250000  |
| C  | -0.09531600 | 1.82867700  | -0.02122500 | C  | -0.04330000 | 1.78600000  | 0.00830000  |
| C  | 0.02984100  | 2.37492900  | -1.29847600 | C  | 0.05300000  | 2.40890000  | -1.23520000 |
| C  | 0.67649400  | 3.58622800  | -1.50091800 | C  | 0.78800000  | 3.57480000  | -1.39590000 |
| C  | 1.20787400  | 4.25319200  | -0.40172700 | C  | 1.43980000  | 4.11310000  | -0.29020000 |
| H  | 1.48486400  | 4.27756800  | 1.73299100  | H  | 1.84590000  | 3.95820000  | 1.81830000  |
| H  | -0.39069600 | 1.83050300  | -2.13433500 | H  | -0.45820000 | 1.95690000  | -2.07530000 |
| H  | 0.77404200  | 4.00350100  | -2.49391000 | H  | 0.86570000  | 4.05410000  | -2.36220000 |
| N  | -0.78747700 | 0.59329900  | 0.13197400  | N  | -0.79850000 | 0.58740000  | 0.11680000  |
| C  | -0.30378400 | -0.63961800 | 0.53325400  | C  | -0.36320000 | -0.68160000 | 0.45470000  |
| C  | -1.38904200 | -1.51061300 | 0.51783100  | C  | -1.48340000 | -1.50380000 | 0.40460000  |
| C  | -2.47601200 | -0.70347200 | 0.09019700  | C  | -2.53840000 | -0.63370000 | 0.02650000  |
| C  | -3.89324400 | -1.12440700 | -0.12768800 | C  | -3.97010000 | -0.99620000 | -0.18220000 |
| O  | -4.27434600 | -2.26474800 | 0.10437300  | O  | -4.38650000 | -2.13010000 | 0.02260000  |
| N  | -4.69463400 | -0.12917300 | -0.60554300 | N  | -4.74750000 | 0.03650000  | -0.61620000 |
| C  | 1.09427800  | -0.90830000 | 0.83654100  | C  | 1.01850000  | -1.01680000 | 0.74820000  |
| C  | 1.58933400  | -1.65298200 | 1.88169800  | C  | 1.46550000  | -1.88660000 | 1.71580000  |
| S  | 2.39841500  | -0.38268500 | -0.20767200 | S  | 2.36320000  | -0.38490000 | -0.17870000 |
| C  | 2.99609200  | -1.79865500 | 1.86480600  | C  | 2.87030000  | -2.04730000 | 1.73240000  |
| H  | 0.95354100  | -2.06330400 | 2.65383200  | H  | 0.79520000  | -2.37230000 | 2.41060000  |
| C  | 3.60087300  | -1.16652000 | 0.80114400  | C  | 3.51860000  | -1.30000000 | 0.77390000  |
| H  | 3.56057100  | -2.33811900 | 2.61274400  | H  | 3.40350000  | -2.67760000 | 2.43020000  |
| Cl | 0.21608000  | 1.94293500  | 2.70154300  | Cl | 0.44800000  | 1.66090000  | 2.70340000  |
| Cl | 2.04177000  | 5.77811800  | -0.63458800 | Cl | 2.39160000  | 5.57480000  | -0.47410000 |

|   |             |             |             |   |             |             |             |
|---|-------------|-------------|-------------|---|-------------|-------------|-------------|
| H | -4.28975100 | 0.78520800  | -0.74898900 | H | -4.32470000 | 0.94560000  | -0.73660000 |
| N | -2.10291000 | 0.55299900  | -0.14543600 | N | -2.11610000 | 0.61720000  | -0.15390000 |
| C | -6.34624700 | -1.17968800 | -1.98781800 | C | -6.45010000 | -0.94630000 | -1.97660000 |
| C | -6.86899700 | -0.52663200 | 0.32510700  | C | -6.89690000 | -0.34500000 | 0.36430000  |
| C | -7.81964100 | -1.06463400 | -2.38532900 | C | -7.93340000 | -0.80970000 | -2.32550000 |
| H | -6.10641300 | -2.21526300 | -1.70782400 | H | -6.21240000 | -1.98850000 | -1.72150000 |
| H | -5.70027900 | -0.89814400 | -2.82286800 | H | -5.82480000 | -0.65380000 | -2.82340000 |
| C | -8.35508200 | -0.39506900 | -0.01603400 | C | -8.39060000 | -0.19280000 | 0.07100000  |
| H | -6.65646300 | -1.52908400 | 0.72263900  | H | -6.68070000 | -1.36050000 | 0.72420000  |
| H | -6.58340100 | 0.20506000  | 1.08460900  | H | -6.57950000 | 0.36230000  | 1.13410000  |
| C | -8.73585700 | -1.31736900 | -1.18119800 | C | -8.81030000 | -1.09180000 | -1.09890000 |
| H | -8.03159500 | -1.77688500 | -3.18908300 | H | -8.17580000 | -1.49650000 | -3.14250000 |
| H | -8.00351200 | -0.05986100 | -2.78203000 | H | -8.12210000 | 0.20840000  | -2.68420000 |
| H | -8.94965500 | -0.62887200 | 0.87278800  | H | -8.96110000 | -0.43700000 | 0.97250000  |
| H | -8.56718600 | 0.64534700  | -0.28667900 | H | -8.59970000 | 0.85370000  | -0.17760000 |
| H | -9.78394600 | -1.17052000 | -1.45960300 | H | -9.86730000 | -0.94230000 | -1.33910000 |
| H | -8.63565300 | -2.36268400 | -0.86316800 | H | -8.69410000 | -2.14290000 | -0.80620000 |
| N | -6.06392100 | -0.25031200 | -0.87889200 | N | -6.12570000 | -0.04320000 | -0.85660000 |
| C | -1.38837600 | -2.97845800 | 0.83375000  | C | -1.55020000 | -2.97840000 | 0.66490000  |
| H | -2.00417100 | -3.49218000 | 0.09324200  | H | -2.20300000 | -3.43310000 | -0.08220000 |
| H | -0.36668000 | -3.35695500 | 0.73654100  | H | -0.55020000 | -3.40440000 | 0.54280000  |
| C | 4.96971700  | -1.08888200 | 0.48027300  | C | 4.89800000  | -1.20170000 | 0.51430000  |
| C | 6.14243000  | -1.01351800 | 0.19763700  | C | 6.07950000  | -1.10220000 | 0.28270000  |
| C | 7.55637200  | -0.94724200 | -0.15251100 | C | 7.50230000  | -1.01450000 | -0.01960000 |
| C | 8.01109100  | -2.07077600 | -1.10824000 | C | 7.94880000  | -1.96560000 | -1.14980000 |
| H | 8.15403800  | -0.98571700 | 0.76643600  | H | 8.07640000  | -1.23300000 | 0.88910000  |
| H | 7.76532900  | 0.02754800  | -0.61005500 | H | 7.74800000  | 0.01860000  | -0.29450000 |
| C | 9.49908300  | -1.97791100 | -1.46051600 | C | 9.44620000  | -1.85490000 | -1.45030000 |
| H | 7.79781700  | -3.03946600 | -0.64409400 | H | 7.70020000  | -2.99430000 | -0.86840000 |
| H | 7.40847600  | -2.02535700 | -2.02151200 | H | 7.37020000  | -1.74210000 | -2.05240000 |
| H | 9.70321100  | -1.00118300 | -1.91575700 | H | 9.68540000  | -0.81950000 | -1.72180000 |
| H | 10.09245500 | -2.01469900 | -0.53884100 | H | 10.01550000 | -2.07130000 | -0.53800000 |
| C | -1.93839100 | -3.31038800 | 2.23149800  | C | -2.10420000 | -3.31300000 | 2.05990000  |
| H | -1.88899800 | -4.38749400 | 2.41372500  | H | -2.10920000 | -4.39420000 | 2.22270000  |
| H | -1.37029000 | -2.80675600 | 3.01913400  | H | -1.50580000 | -2.85060000 | 2.85050000  |
| H | -2.98186100 | -3.00205400 | 2.30730500  | H | -3.12940000 | -2.95030000 | 2.14520000  |
| C | 9.95917300  | -3.08889900 | -2.40833700 | C | 9.89500000  | -2.79640000 | -2.57100000 |

|    |             |             |             |    |             |             |             |
|----|-------------|-------------|-------------|----|-------------|-------------|-------------|
| H  | 11.02321500 | -2.99703900 | -2.64145500 | H  | 10.96600000 | -2.70050000 | -2.76820000 |
| H  | 9.79975300  | -4.07708500 | -1.96629100 | H  | 9.69530000  | -3.84040000 | -2.31080000 |
| H  | 9.40783200  | -3.05638400 | -3.35294900 | H  | 9.36310000  | -2.58010000 | -3.50250000 |
| 29 |             |             |             |    |             |             |             |
| C  | 0.59915600  | 3.21825500  | 1.21551700  | C  | 0.81970000  | 3.11920000  | 0.95390000  |
| C  | 0.18004400  | 1.89453900  | 1.31145200  | C  | 0.27600000  | 1.84030000  | 1.02140000  |
| C  | -0.21469300 | 1.18923500  | 0.16930600  | C  | -0.16800000 | 1.19700000  | -0.13920000 |
| C  | -0.22108400 | 1.84493400  | -1.06182200 | C  | -0.09700000 | 1.86830000  | -1.35890000 |
| C  | 0.17923300  | 3.16942300  | -1.17207200 | C  | 0.42660000  | 3.15080000  | -1.44010000 |
| C  | 0.59595500  | 3.84015000  | -0.02671600 | C  | 0.89120000  | 3.75890000  | -0.27750000 |
| H  | 0.90787000  | 3.75434200  | 2.10163300  | H  | 1.16920000  | 3.60790000  | 1.85200000  |
| H  | -0.54634000 | 1.29486500  | -1.93564600 | H  | -0.45820000 | 1.36100000  | -2.24420000 |
| H  | 0.17606600  | 3.67182100  | -2.12982300 | H  | 0.48550000  | 3.66840000  | -2.38780000 |
| N  | -0.65668800 | -0.16284800 | 0.22981100  | N  | -0.70730000 | -0.11670000 | -0.11110000 |
| C  | 0.06161900  | -1.30911400 | 0.52128500  | C  | -0.08540000 | -1.30300000 | 0.23260000  |
| C  | -0.84098200 | -2.36521700 | 0.44868600  | C  | -1.04660000 | -2.29940000 | 0.09910000  |
| C  | -2.07194200 | -1.75069000 | 0.10500200  | C  | -2.20680000 | -1.61180000 | -0.33560000 |
| C  | -3.39491700 | -2.41248400 | -0.11017500 | C  | -3.55400000 | -2.18570000 | -0.62380000 |
| O  | -3.53148600 | -3.62432800 | 0.00539600  | O  | -3.81490000 | -3.36620000 | -0.42050000 |
| N  | -4.39755800 | -1.55440400 | -0.44019500 | N  | -4.44760000 | -1.28960000 | -1.11160000 |
| C  | 1.48887600  | -1.33627800 | 0.80022200  | C  | 1.30940000  | -1.41450000 | 0.61540000  |
| C  | 2.12685700  | -2.08729100 | 1.76040800  | C  | 1.82990000  | -2.25720000 | 1.57050000  |
| S  | 2.65862400  | -0.45622500 | -0.16112100 | S  | 2.58720000  | -0.50540000 | -0.16430000 |
| C  | 3.53517000  | -1.95867400 | 1.74514800  | C  | 3.23620000  | -2.17780000 | 1.69490000  |
| H  | 1.58787700  | -2.69680000 | 2.47249900  | H  | 1.20530000  | -2.89420000 | 2.18070000  |
| C  | 3.99811700  | -1.10594200 | 0.76775500  | C  | 3.81210000  | -1.27140000 | 0.83240000  |
| H  | 4.19939600  | -2.46195700 | 2.43406900  | H  | 3.81930000  | -2.75250000 | 2.40090000  |
| Cl | 0.12930500  | 1.15161300  | 2.88980900  | Cl | 0.14790000  | 1.06950000  | 2.58150000  |
| Cl | 1.11942700  | 5.50988500  | -0.14359100 | Cl | 1.57540000  | 5.37200000  | -0.35920000 |
| H  | -4.15218100 | -0.57670600 | -0.49004600 | H  | -4.13140000 | -0.33780000 | -1.21480000 |
| N  | -1.94934000 | -0.43177100 | -0.03088100 | N  | -1.99250000 | -0.30260000 | -0.46480000 |
| C  | -0.56006600 | -3.82304200 | 0.64114200  | C  | -0.87630000 | -3.76870000 | 0.32140000  |
| H  | -0.81354000 | -4.14482500 | 1.65649300  | H  | -1.15060000 | -4.04590000 | 1.34440000  |
| H  | -1.17272700 | -4.41813500 | -0.03395600 | H  | -1.53420000 | -4.32870000 | -0.34060000 |
| H  | 0.49674900  | -4.04000700 | 0.47190700  | H  | 0.16210000  | -4.06640000 | 0.15790000  |
| C  | 5.32383200  | -0.73256300 | 0.47512100  | C  | 5.16840000  | -0.92460000 | 0.69160000  |
| C  | 6.45794700  | -0.40304700 | 0.21804800  | C  | 6.32800000  | -0.61150000 | 0.56190000  |

|    |             |             |             |   |             |             |             |
|----|-------------|-------------|-------------|---|-------------|-------------|-------------|
| C  | 7.83005300  | -0.02849100 | -0.10333900 | C | 7.73100000  | -0.26290000 | 0.37890000  |
| C  | 8.48791500  | -0.93639900 | -1.16418100 | C | 8.39380000  | -0.99190000 | -0.80870000 |
| H  | 8.42972100  | -0.04671500 | 0.81495500  | H | 8.28070000  | -0.49170000 | 1.30020000  |
| H  | 7.84336400  | 1.01077700  | -0.45402900 | H | 7.81630000  | 0.82110000  | 0.23430000  |
| C  | 9.92770800  | -0.52156900 | -1.48316800 | C | 9.86590000  | -0.60810000 | -0.98310000 |
| H  | 8.46886100  | -1.97133200 | -0.80664200 | H | 8.30590000  | -2.07290000 | -0.65680000 |
| H  | 7.88248500  | -0.91252600 | -2.07640900 | H | 7.83770000  | -0.76070000 | -1.72340000 |
| H  | 9.93633100  | 0.51858600  | -1.83091100 | H | 9.94280000  | 0.47680000  | -1.12530000 |
| H  | 10.52246800 | -0.53995000 | -0.56183300 | H | 10.41130000 | -0.83500000 | -0.05900000 |
| C  | -5.77072900 | -1.99021900 | -0.68083000 | C | -5.85310000 | -1.62650000 | -1.33720000 |
| C  | -6.77083200 | -1.46087600 | 0.37413500  | C | -6.63660000 | -1.76840000 | -0.01480000 |
| C  | -6.34480400 | -1.44295300 | -2.00744900 | C | -6.57380000 | -0.46490000 | -2.04330000 |
| H  | -5.72303200 | -3.07841800 | -0.67433600 | H | -5.87840000 | -2.55400000 | -1.91270000 |
| H  | -6.33405500 | -1.43644200 | 1.37501300  | H | -6.06410000 | -2.31780000 | 0.73380000  |
| H  | -7.62296600 | -2.14727800 | 0.40881400  | H | -7.54670000 | -2.34270000 | -0.21670000 |
| C  | -6.96781400 | -0.06563200 | -1.67819900 | C | -6.99540000 | 0.51750000  | -0.92290000 |
| H  | -7.12461000 | -2.13079300 | -2.34863100 | H | -7.45980000 | -0.86910000 | -2.54010000 |
| H  | -5.58778900 | -1.39805000 | -2.79403300 | H | -5.95790000 | 0.00220000  | -2.81730000 |
| H  | -7.90704200 | 0.05956000  | -2.22266800 | H | -7.99630000 | 0.90520000  | -1.12650000 |
| C  | -7.23350700 | -0.07378400 | -0.12633400 | C | -6.99390000 | -0.32760000 | 0.40420000  |
| C  | -6.46183000 | 1.14726300  | 0.43370200  | C | -5.98040000 | 0.37640000  | 1.33740000  |
| C  | -6.34679100 | 2.11170400  | -0.75690700 | C | -5.98590000 | 1.83870000  | 0.86920000  |
| H  | -5.46090700 | 0.84946200  | 0.76551900  | H | -4.98190000 | -0.04670000 | 1.19650000  |
| H  | -6.95893500 | 1.59037400  | 1.30035300  | H | -6.23640000 | 0.25930000  | 2.39340000  |
| C  | -6.07270200 | 1.17201900  | -1.94188100 | C | -6.04240000 | 1.71230000  | -0.66170000 |
| H  | -7.29769100 | 2.63572200  | -0.90757500 | H | -6.88550000 | 2.34730000  | 1.23520000  |
| H  | -5.57337400 | 2.87247100  | -0.62243400 | H | -5.12090000 | 2.40740000  | 1.21990000  |
| H  | -6.27632900 | 1.63203700  | -2.91228700 | H | -6.37650000 | 2.62680000  | -1.15820000 |
| H  | -5.01398600 | 0.88765900  | -1.94914400 | H | -5.03690000 | 1.50250000  | -1.04320000 |
| H  | -8.29889800 | 0.06288600  | 0.07573200  | H | -7.98150000 | -0.29980000 | 0.87180000  |
| C  | 10.58841600 | -1.41679800 | -2.53501900 | C | 10.52870000 | -1.32840000 | -2.16040000 |
| H  | 11.61319900 | -1.09731900 | -2.74174700 | H | 11.57770000 | -1.03960000 | -2.26590000 |
| H  | 10.62575900 | -2.45811500 | -2.20096100 | H | 10.49270000 | -2.41400000 | -2.02750000 |
| H  | 10.03558000 | -1.39204000 | -3.47899200 | H | 10.02120000 | -1.09330000 | -3.10090000 |
| 30 |             |             |             |   |             |             |             |
| C  | 0.59541700  | 3.35156700  | 1.14445800  | C | 0.83090000  | 3.13730000  | 1.24330000  |
| C  | 0.12734500  | 2.04792700  | 1.28068500  | C | 0.27890000  | 1.86360000  | 1.33650000  |

|    |             |             |             |    |             |             |             |
|----|-------------|-------------|-------------|----|-------------|-------------|-------------|
| C  | -0.29914500 | 1.32497200  | 0.16123000  | C  | -0.28360000 | 1.25080000  | 0.21130000  |
| C  | -0.28700300 | 1.94441500  | -1.08847700 | C  | -0.32150000 | 1.94830000  | -0.99540000 |
| C  | 0.16215900  | 3.24910900  | -1.23900600 | C  | 0.20910000  | 3.22620000  | -1.10010000 |
| C  | 0.60945400  | 3.93673800  | -0.11541400 | C  | 0.79210000  | 3.80310000  | 0.02430000  |
| H  | 0.92841500  | 3.90118900  | 2.01331900  | H  | 1.27220000  | 3.60190000  | 2.11330000  |
| H  | -0.63708800 | 1.38174000  | -1.94449000 | H  | -0.77310000 | 1.46470000  | -1.85190000 |
| H  | 0.17317900  | 3.72317100  | -2.21103700 | H  | 0.18350000  | 3.76360000  | -2.03820000 |
| N  | -0.79121200 | -0.00714200 | 0.26284500  | N  | -0.83290000 | -0.05790000 | 0.26250000  |
| C  | -0.11481500 | -1.17052900 | 0.58483700  | C  | -0.19300000 | -1.25760000 | 0.51430000  |
| C  | -1.05579400 | -2.19398400 | 0.54506800  | C  | -1.16820000 | -2.24500000 | 0.42850000  |
| C  | -2.26522300 | -1.54420200 | 0.18788100  | C  | -2.35740000 | -1.53820000 | 0.11700000  |
| C  | -3.60908600 | -2.17403900 | -0.00509900 | C  | -3.72150000 | -2.11280000 | -0.09770000 |
| O  | -3.78259200 | -3.37152300 | 0.12511600  | O  | -3.92990000 | -3.31150000 | -0.06350000 |
| N  | -4.58456800 | -1.26748700 | -0.33424700 | N  | -4.67150000 | -1.15300000 | -0.32890000 |
| C  | 1.31189900  | -1.24217200 | 0.85936400  | C  | 1.22860000  | -1.38760000 | 0.77410000  |
| C  | 1.92637400  | -1.98086700 | 1.84398700  | C  | 1.82090000  | -2.24920000 | 1.66840000  |
| S  | 2.50855100  | -0.44377500 | -0.13936400 | S  | 2.44340000  | -0.47830000 | -0.10020000 |
| C  | 3.33851900  | -1.90703500 | 1.81752500  | C  | 3.23340000  | -2.18420000 | 1.67190000  |
| H  | 1.36864800  | -2.54257000 | 2.58057100  | H  | 1.24460000  | -2.88970000 | 2.32090000  |
| C  | 3.82781000  | -1.10954800 | 0.80689400  | C  | 3.74200000  | -1.26990000 | 0.77600000  |
| H  | 3.98717400  | -2.40968300 | 2.52157800  | H  | 3.86950000  | -2.77470000 | 2.31650000  |
| Cl | 0.05604700  | 1.35395100  | 2.88044000  | Cl | 0.29150000  | 1.06090000  | 2.88580000  |
| Cl | 1.19473700  | 5.58143600  | -0.28317300 | Cl | 1.48740000  | 5.40960000  | -0.08970000 |
| H  | -4.31407400 | -0.29181400 | -0.40369800 | H  | -4.36820000 | -0.18510000 | -0.34570000 |
| N  | -2.09424400 | -0.23482100 | 0.01355300  | N  | -2.14420000 | -0.22680000 | 0.01000000  |
| C  | -0.82718500 | -3.65505700 | 0.77761700  | C  | -0.98540000 | -3.72160000 | 0.58400000  |
| H  | -1.10549400 | -3.94231700 | 1.79676300  | H  | -1.21280000 | -4.04090000 | 1.60640000  |
| H  | -1.45016500 | -4.24672800 | 0.10892800  | H  | -1.67080000 | -4.25610000 | -0.07090000 |
| C  | -6.84813900 | -1.25651700 | 0.47090800  | C  | -6.93310000 | -1.06050000 | 0.43850000  |
| C  | -6.33132600 | -1.52914000 | -1.95129200 | C  | -6.38450000 | -1.23880000 | -1.98610000 |
| C  | -7.15839200 | 0.24384900  | 0.59848200  | C  | -7.11390000 | 0.45200000  | 0.63950000  |
| H  | -7.77513500 | -1.80076200 | 0.26023500  | H  | -7.89740000 | -1.51090000 | 0.18060000  |
| H  | -6.47096000 | -1.63736100 | 1.42384700  | H  | -6.60820000 | -1.52270000 | 1.37460000  |
| C  | -6.19992300 | -0.14276300 | -2.62390600 | C  | -6.08790000 | 0.15910000  | -2.57220000 |
| H  | -7.37791000 | -1.84523000 | -1.96180100 | H  | -7.45750000 | -1.44110000 | -2.03380000 |
| H  | -5.78118100 | -2.26241100 | -2.54965300 | H  | -5.89620000 | -1.99290000 | -2.61160000 |
| C  | -7.63173000 | 0.92776400  | -0.69514200 | C  | -7.49410000 | 1.23360000  | -0.62940000 |

|    |             |             |             |   |             |             |             |
|----|-------------|-------------|-------------|---|-------------|-------------|-------------|
| H  | -6.27197600 | 0.77192500  | 0.97245200  | H | -6.19160000 | 0.87790000  | 1.05450000  |
| H  | -7.92408100 | 0.35655900  | 1.37544200  | H | -7.88390000 | 0.59510000  | 1.40670000  |
| C  | -6.52410100 | 1.09087900  | -1.75241400 | C | -6.34290000 | 1.36780000  | -1.64380000 |
| H  | -6.85877200 | -0.15461200 | -3.49994800 | H | -6.69570000 | 0.25740000  | -3.47870000 |
| H  | -5.18544700 | -0.02702300 | -3.01924500 | H | -5.04590000 | 0.19400000  | -2.90560000 |
| H  | -8.48807700 | 0.38659200  | -1.11803200 | H | -8.36980000 | 0.77460000  | -1.10580000 |
| H  | -8.00578100 | 1.92374700  | -0.43588600 | H | -7.80590000 | 2.23950000  | -0.33030000 |
| H  | -6.78664700 | 1.91469300  | -2.42391100 | H | -6.51950000 | 2.24460000  | -2.27460000 |
| H  | -5.61529300 | 1.42352600  | -1.23472000 | H | -5.42850000 | 1.60030000  | -1.08310000 |
| C  | 5.16503300  | -0.79888000 | 0.49394500  | C | 5.08470000  | -0.93310000 | 0.52420000  |
| C  | 6.30922200  | -0.52344200 | 0.21855400  | C | 6.23230000  | -0.62900000 | 0.30060000  |
| C  | 7.69243100  | -0.21503100 | -0.12479100 | C | 7.61870000  | -0.29160000 | 0.00480000  |
| C  | 8.30351400  | -1.18159100 | -1.16152300 | C | 8.18040000  | -1.03120000 | -1.22740000 |
| H  | 8.29898500  | -0.22901900 | 0.78903500  | H | 8.23820000  | -0.51960000 | 0.88080000  |
| H  | 7.74459500  | 0.81141100  | -0.50811800 | H | 7.69960000  | 0.79110000  | -0.15210000 |
| H  | 8.24617400  | -2.20318100 | -0.77121200 | H | 8.09630000  | -2.11080000 | -1.06360000 |
| H  | 7.69111700  | -1.16187300 | -2.06919100 | H | 7.55600000  | -0.79950000 | -2.09680000 |
| H  | 0.22385800  | -3.91127000 | 0.62903400  | H | 0.04530000  | -4.00770000 | 0.36260000  |
| N  | -5.89532900 | -1.66092100 | -0.56364100 | N | -5.99180000 | -1.48290000 | -0.59900000 |
| C  | 9.75580200  | -0.83562500 | -1.50505300 | C | 9.63720000  | -0.66010000 | -1.51880000 |
| H  | 10.35787900 | -0.84904900 | -0.58839700 | H | 10.25160000 | -0.88760000 | -0.63910000 |
| H  | 9.80301900  | 0.19185900  | -1.88580800 | H | 9.71120000  | 0.42340000  | -1.67180000 |
| C  | 10.37013600 | -1.78957500 | -2.53312100 | C | 10.19990000 | -1.39080000 | -2.74080000 |
| H  | 11.40496600 | -1.51853100 | -2.75816100 | H | 11.23960000 | -1.11100000 | -2.92980000 |
| H  | 10.36868300 | -2.82050900 | -2.16637600 | H | 10.16620000 | -2.47550000 | -2.60020000 |
| H  | 9.80997100  | -1.77220700 | -3.47293100 | H | 9.62190000  | -1.15580000 | -3.63980000 |
| 31 |             |             |             |   |             |             |             |
| C  | 0.23485900  | 3.73505500  | 0.73079800  | C | 0.71390000  | 3.55440000  | 0.77250000  |
| C  | -0.31443600 | 2.46377000  | 0.87111300  | C | 0.00400000  | 2.36470000  | 0.90300000  |
| C  | -0.62028700 | 1.69317600  | -0.25547500 | C | -0.50120000 | 1.71350000  | -0.22710000 |
| C  | -0.40477800 | 2.23287100  | -1.52309000 | C | -0.32290000 | 2.29290000  | -1.48260000 |
| C  | 0.12818800  | 3.50486300  | -1.68071000 | C | 0.36690000  | 3.48810000  | -1.62750000 |
| C  | 0.45232400  | 4.23998200  | -0.54498400 | C | 0.89020000  | 4.10080000  | -0.49270000 |
| H  | 0.47269600  | 4.32247100  | 1.60616000  | H | 1.10930000  | 4.04870000  | 1.64820000  |
| H  | -0.66299600 | 1.63473100  | -2.38776600 | H | -0.73300000 | 1.78260000  | -2.34460000 |
| H  | 0.29721500  | 3.91725300  | -2.66612200 | H | 0.50900000  | 3.93320000  | -2.60280000 |
| N  | -1.18549700 | 0.39018800  | -0.14849500 | N | -1.19820000 | 0.47880000  | -0.13690000 |

|    |             |             |             |    |             |             |             |
|----|-------------|-------------|-------------|----|-------------|-------------|-------------|
| C  | -0.59602000 | -0.78021000 | 0.29462700  | C  | -0.71740000 | -0.75190000 | 0.27360000  |
| C  | -1.56801300 | -1.76934700 | 0.20336900  | C  | -1.77010000 | -1.64770000 | 0.13890000  |
| C  | -2.70682900 | -1.09079600 | -0.30695700 | C  | -2.83680000 | -0.85860000 | -0.36650000 |
| C  | -4.06165300 | -1.65476800 | -0.58481500 | C  | -4.22440000 | -1.30610000 | -0.67830000 |
| O  | -4.30811300 | -2.84553900 | -0.43012700 | O  | -4.56520000 | -2.47870000 | -0.56100000 |
| N  | -4.97065600 | -0.74202300 | -1.01839300 | N  | -5.05920000 | -0.32140000 | -1.09990000 |
| C  | 0.79513200  | -0.87058700 | 0.72519800  | C  | 0.65260000  | -0.97280000 | 0.70970000  |
| C  | 1.27269000  | -1.37603300 | 1.91029500  | C  | 1.06890000  | -1.64630000 | 1.83290000  |
| S  | 2.12065800  | -0.39884200 | -0.31595300 | S  | 2.02670000  | -0.41560000 | -0.21960000 |
| C  | 2.68490800  | -1.38222700 | 2.00138400  | C  | 2.47540000  | -1.71820000 | 1.96470000  |
| H  | 0.61722100  | -1.71295000 | 2.70186300  | H  | 0.37290000  | -2.04870000 | 2.55580000  |
| C  | 3.30927100  | -0.87890300 | 0.88165800  | C  | 3.15410000  | -1.09500000 | 0.94070000  |
| H  | 3.23765400  | -1.73160900 | 2.86249100  | H  | 2.98730000  | -2.19610000 | 2.78840000  |
| Cl | -0.64985300 | 1.87672500  | 2.48057900  | Cl | -0.26160000 | 1.72530000  | 2.50520000  |
| Cl | 1.13997900  | 5.84385200  | -0.71926800 | Cl | 1.78460000  | 5.60120000  | -0.65410000 |
| H  | -4.66483900 | 0.21894200  | -1.07039700 | H  | -4.70290000 | 0.62280000  | -1.09720000 |
| N  | -2.46411400 | 0.20173800  | -0.51743500 | N  | -2.48130000 | 0.41470000  | -0.53380000 |
| C  | -1.41440700 | -3.23364700 | 0.50283900  | C  | -1.75130000 | -3.13000000 | 0.37010000  |
| H  | -0.54386800 | -3.37706900 | 1.14713100  | H  | -0.89870000 | -3.38760000 | 1.00170000  |
| H  | -2.29427400 | -3.57262900 | 1.05323200  | H  | -2.66210000 | -3.41300000 | 0.90140000  |
| C  | 4.68666700  | -0.72257100 | 0.63287000  | C  | 4.54260000  | -0.95830000 | 0.75690000  |
| C  | 5.86623300  | -0.58139300 | 0.41069800  | C  | 5.73170000  | -0.82750000 | 0.58820000  |
| C  | 7.29191600  | -0.43896300 | 0.13958200  | C  | 7.16690000  | -0.70630000 | 0.36710000  |
| C  | 7.93676400  | -1.70492200 | -0.46369000 | C  | 7.74240000  | -1.81120000 | -0.54350000 |
| H  | 7.80852300  | -0.17458600 | 1.07044900  | H  | 7.68240000  | -0.72620000 | 1.33510000  |
| H  | 7.44232700  | 0.40720900  | -0.54196400 | H  | 7.38090000  | 0.27590000  | -0.07200000 |
| C  | 9.43351400  | -1.52960300 | -0.73908800 | C  | 9.25060000  | -1.66230000 | -0.76280000 |
| H  | 7.78002000  | -2.54418500 | 0.22214600  | H  | 7.52510000  | -2.78810000 | -0.09870000 |
| H  | 7.41468800  | -1.96140800 | -1.39153400 | H  | 7.22160000  | -1.78580000 | -1.50660000 |
| H  | 9.57974000  | -0.68177700 | -1.41933600 | H  | 9.45740000  | -0.67780000 | -1.19990000 |
| H  | 9.94478200  | -1.26350100 | 0.19404300  | H  | 9.76100000  | -1.67940000 | 0.20780000  |
| C  | -1.26170200 | -4.09531000 | -0.76240800 | C  | -1.67700000 | -3.92340000 | -0.94520000 |
| H  | -2.15379400 | -4.01420200 | -1.38454300 | H  | -2.55720000 | -3.71630000 | -1.55500000 |
| H  | -0.39126400 | -3.78600900 | -1.34761500 | H  | -0.77970000 | -3.65710000 | -1.51090000 |
| H  | -1.13208800 | -5.14696200 | -0.49206800 | H  | -1.64760000 | -4.99770000 | -0.74330000 |
| C  | -6.35553800 | -1.08337100 | -1.30256600 | C  | -6.46540000 | -0.57550000 | -1.37530000 |
| C  | -7.31763200 | -0.73176900 | -0.16015100 | C  | -7.34190000 | -0.54310000 | -0.11770000 |



|    |              |             |             |   |              |             |             |
|----|--------------|-------------|-------------|---|--------------|-------------|-------------|
| H  | -6.38220500  | -2.15736000 | -1.49433600 | H | -6.53630000  | -1.56010000 | -1.84320000 |
| H  | -6.65870700  | -0.57095800 | -2.22204700 | H | -6.80840000  | 0.16670000  | -2.10230000 |
| C  | -8.77342500  | -1.08261700 | -0.48521100 | C | -8.81610000  | -0.82470000 | -0.42050000 |
| H  | -6.99809800  | -1.26660500 | 0.74075900  | H | -6.95670000  | -1.28940000 | 0.58450000  |
| H  | -7.23780700  | 0.33909000  | 0.06543400  | H | -7.24100000  | 0.43510000  | 0.36830000  |
| C  | -9.74224200  | -0.74010700 | 0.65009100  | C | -9.69400000  | -0.80290000 | 0.83380000  |
| H  | -9.07983600  | -0.55549100 | -1.39729100 | H | -9.18850000  | -0.08630000 | -1.14170000 |
| H  | -8.84312200  | -2.15265400 | -0.71399200 | H | -8.90190000  | -1.80170000 | -0.91080000 |
| H  | -10.77091400 | -1.00328300 | 0.38943700  | H | -10.74040000 | -1.01090000 | 0.59460000  |
| H  | -9.48278300  | -1.27962000 | 1.56596800  | H | -9.36050000  | -1.55310000 | 1.55720000  |
| H  | -9.72059200  | 0.32985300  | 0.87936800  | H | -9.65130000  | 0.17350000  | 1.32650000  |
| C  | 10.08157100  | -2.78132900 | -1.33706000 | C | 9.82710000   | -2.75620000 | -1.66550000 |
| H  | 11.14770100  | -2.62682800 | -1.52273900 | H | 10.90350000  | -2.63000000 | -1.80820000 |
| H  | 9.98206900   | -3.63817900 | -0.66383000 | H | 9.66110000   | -3.74860000 | -1.23540000 |
| H  | 9.61419500   | -3.05246400 | -2.28856300 | H | 9.35500000   | -2.74040000 | -2.65260000 |
| 32 |              |             |             |   |              |             |             |
| C  | 0.99562900   | 3.75962100  | 0.72031000  | C | 1.47760000   | 3.56390000  | 0.78880000  |
| C  | 0.40924800   | 2.50287400  | 0.83993800  | C | 0.72690000   | 2.39610000  | 0.88340000  |
| C  | 0.11026700   | 1.74662900  | -0.29815700 | C | 0.23600000   | 1.77410000  | -0.26930000 |
| C  | 0.37081100   | 2.28685200  | -1.55704500 | C | 0.47070000   | 2.36150000  | -1.51160000 |
| C  | 0.94132900   | 3.54483900  | -1.69437800 | C | 1.20200000   | 3.53560000  | -1.62120000 |
| C  | 1.25741300   | 4.26507700  | -0.54691100 | C | 1.70950000   | 4.11850000  | -0.46380000 |
| H  | 1.22785700   | 4.33587700  | 1.60455000  | H | 1.86150000   | 4.03550000  | 1.68200000  |
| H  | 0.11778900   | 1.70028700  | -2.43113700 | H | 0.07120000   | 1.87420000  | -2.39170000 |
| H  | 1.14520100   | 3.95761500  | -2.67301200 | H | 1.38780000   | 3.98680000  | -2.58630000 |
| N  | -0.49185200  | 0.45871000  | -0.21224200 | N | -0.50200000  | 0.56140000  | -0.21490000 |
| C  | 0.05577000   | -0.72933800 | 0.23756300  | C | -0.07260000  | -0.68860000 | 0.19430000  |
| C  | -0.93987600  | -1.69158100 | 0.11823500  | C | -1.14850000  | -1.54880000 | 0.01800000  |
| C  | -2.04811900  | -0.98009300 | -0.41413600 | C | -2.17450000  | -0.72040000 | -0.50860000 |
| C  | -3.41083400  | -1.50606000 | -0.72593900 | C | -3.56570000  | -1.12000000 | -0.86600000 |
| O  | -3.69253900  | -2.69056200 | -0.58351900 | O | -3.94640000  | -2.28250000 | -0.77330000 |
| N  | -4.28500600  | -0.56723400 | -1.17499900 | N | -4.35670000  | -0.10460000 | -1.29900000 |
| C  | 1.43371400   | -0.85902600 | 0.69947900  | C | 1.27610000   | -0.95780000 | 0.66800000  |
| C  | 1.87024700   | -1.38264400 | 1.89248700  | C | 1.63730000   | -1.65600000 | 1.79510000  |
| S  | 2.79498200   | -0.41779000 | -0.30841300 | S | 2.69420000   | -0.43470000 | -0.21390000 |
| C  | 3.27933600   | -1.42676300 | 2.01596300  | C | 3.03630000   | -1.77420000 | 1.96750000  |
| H  | 1.18800500   | -1.70574100 | 2.66700800  | H | 0.90770000   | -2.04360000 | 2.49250000  |

|    |             |             |             |    |             |             |             |
|----|-------------|-------------|-------------|----|-------------|-------------|-------------|
| C  | 3.94249300  | -0.93484200 | 0.91361500  | C  | 3.76450000  | -1.16200000 | 0.97120000  |
| H  | 3.80260100  | -1.79472500 | 2.88768600  | H  | 3.50810000  | -2.27680000 | 2.80030000  |
| Cl | 0.01937900  | 1.91662600  | 2.43737900  | Cl | 0.39250000  | 1.74760000  | 2.46900000  |
| Cl | 1.99190800  | 5.85069700  | -0.69522700 | Cl | 2.65540000  | 5.59130000  | -0.57990000 |
| H  | -3.95286500 | 0.38556300  | -1.21413900 | H  | -3.97120000 | 0.82780000  | -1.27410000 |
| N  | -1.76619100 | 0.30655100  | -0.61147300 | N  | -1.77420000 | 0.54270000  | -0.64990000 |
| C  | -0.83230700 | -3.16098700 | 0.41272300  | C  | -1.18330000 | -3.03340000 | 0.23170000  |
| H  | 0.01951800  | -3.33102600 | 1.07530800  | H  | -0.35810000 | -3.32510000 | 0.88460000  |
| H  | -1.73298000 | -3.47891600 | 0.94160600  | H  | -2.11770000 | -3.29330000 | 0.73290000  |
| C  | 5.32889100  | -0.81342900 | 0.69745900  | C  | 5.16160000  | -1.06760000 | 0.83010000  |
| C  | 6.51650700  | -0.70168800 | 0.50316300  | C  | 6.35870000  | -0.97300000 | 0.69850000  |
| C  | 7.95119100  | -0.59429400 | 0.26544600  | C  | 7.80300000  | -0.89500000 | 0.52160000  |
| C  | 8.57611000  | -1.87031000 | -0.33760900 | C  | 8.36790000  | -1.99510000 | -0.40130000 |
| H  | 8.45341700  | -0.35366500 | 1.21051300  | H  | 8.28880000  | -0.95730000 | 1.50300000  |
| H  | 8.13908900  | 0.25485900  | -0.40297000 | H  | 8.06250000  | 0.09030000  | 0.11510000  |
| C  | 10.08270000 | -1.73147200 | -0.57791700 | C  | 9.88610000  | -1.89260000 | -0.57270000 |
| H  | 8.38225300  | -2.71240800 | 0.33514100  | H  | 8.10470000  | -2.97510000 | 0.01060000  |
| H  | 8.06841300  | -2.10308900 | -1.27957600 | H  | 7.87730000  | -1.92700000 | -1.37800000 |
| H  | 10.26610500 | -0.88060300 | -1.24523500 | H  | 10.13900000 | -0.90470000 | -0.97670000 |
| H  | 10.57972700 | -1.48880100 | 0.36919300  | H  | 10.36650000 | -1.95280000 | 0.41150000  |
| C  | -0.67463900 | -4.02008900 | -0.85365200 | C  | -1.09550000 | -3.81420000 | -1.09040000 |
| H  | -1.55018900 | -3.91187300 | -1.49486300 | H  | -1.95040000 | -3.57210000 | -1.72290000 |
| H  | 0.21657800  | -3.73140900 | -1.41773900 | H  | -0.17400000 | -3.57030000 | -1.62650000 |
| H  | -0.57929200 | -5.07619100 | -0.58641200 | H  | -1.10600000 | -4.89100000 | -0.90080000 |
| C  | -5.67182900 | -0.87019500 | -1.49176100 | C  | -5.76170000 | -0.31100000 | -1.61740000 |
| C  | -6.64865100 | -0.50656300 | -0.36555200 | C  | -6.67160000 | -0.27170000 | -0.38390000 |
| H  | -5.72172000 | -1.94100700 | -1.69621200 | H  | -5.84930000 | -1.28560000 | -2.10330000 |
| H  | -5.94216600 | -0.34023400 | -2.41146700 | H  | -6.06140000 | 0.45270000  | -2.34100000 |
| C  | -8.10520400 | -0.81699400 | -0.72599200 | C  | -8.14370000 | -0.50390000 | -0.73310000 |
| H  | -6.36107000 | -1.05943500 | 0.53505800  | H  | -6.32820000 | -1.04040000 | 0.31550000  |
| H  | -6.54562100 | 0.55921900  | -0.12650700 | H  | -6.55460000 | 0.69520000  | 0.12030000  |
| C  | -9.09733400 | -0.46568400 | 0.38834700  | C  | -9.06530000 | -0.47880000 | 0.49000000  |
| H  | -8.37983900 | -0.27170400 | -1.63863300 | H  | -8.47580000 | 0.25730000  | -1.45170000 |
| H  | -8.19754300 | -1.88310200 | -0.96907600 | H  | -8.24600000 | -1.47040000 | -1.24270000 |
| H  | -8.82346500 | -1.01065200 | 1.30072700  | H  | -8.73160000 | -1.23830000 | 1.20850000  |
| H  | -9.00545500 | 0.60061900  | 0.63269200  | H  | -8.96440000 | 0.48770000  | 1.00060000  |
| C  | 10.71119000 | -2.99335900 | -1.17541300 | C  | 10.45220000 | -2.98170000 | -1.48780000 |

|    |              |             |             |    |              |             |             |
|----|--------------|-------------|-------------|----|--------------|-------------|-------------|
| H  | 11.78485100  | -2.86491000 | -1.33582800 | H  | 11.53610000  | -2.88920000 | -1.59560000 |
| H  | 10.57447100  | -3.85439500 | -0.51415900 | H  | 10.23990000  | -3.97870000 | -1.08990000 |
| H  | 10.25827100  | -3.24205000 | -2.13995100 | H  | 10.01080000  | -2.92360000 | -2.48740000 |
| C  | -10.55559000 | -0.77750400 | 0.03323500  | C  | -10.53960000 | -0.71830000 | 0.14920000  |
| C  | -11.53960300 | -0.42423600 | 1.15211600  | C  | -11.45060000 | -0.69200000 | 1.37960000  |
| H  | -10.64687400 | -1.84287800 | -0.21038700 | H  | -10.63850000 | -1.68440000 | -0.36050000 |
| H  | -10.82906800 | -0.23313200 | -0.87888100 | H  | -10.87130000 | 0.04070000  | -0.56980000 |
| H  | -12.56915500 | -0.65846700 | 0.86793700  | H  | -12.49590000 | -0.86570000 | 1.10970000  |
| H  | -11.31334600 | -0.97987700 | 2.06751700  | H  | -11.15950000 | -1.46280000 | 2.10020000  |
| H  | -11.49660700 | 0.64224500  | 1.39470700  | H  | -11.39390000 | 0.27470000  | 1.89010000  |
| 33 |              |             |             |    |              |             |             |
| C  | 0.71176200   | 3.77400900  | 0.76715200  | C  | 1.14010000   | 3.56630000  | 0.78730000  |
| C  | 0.16330400   | 2.51985300  | 1.01987500  | C  | 0.46440000   | 2.38450000  | 1.07610000  |
| C  | -0.24660800  | 1.69752000  | -0.03481300 | C  | -0.16330000  | 1.66020000  | 0.05720000  |
| C  | -0.13598300  | 2.16901600  | -1.34251700 | C  | -0.14130000  | 2.15880000  | -1.24450000 |
| C  | 0.39453600   | 3.42330800  | -1.61108100 | C  | 0.51250000   | 3.34510000  | -1.54550000 |
| C  | 0.82351100   | 4.21014800  | -0.54703500 | C  | 1.15920000   | 4.03130000  | -0.52180000 |
| H  | 1.03039300   | 4.40155300  | 1.58723800  | H  | 1.63030000   | 4.11730000  | 1.57700000  |
| H  | -0.47417300  | 1.53159600  | -2.14962200 | H  | -0.64450000  | 1.59280000  | -2.01780000 |
| H  | 0.48194200   | 3.78259600  | -2.62741900 | H  | 0.53330000   | 3.72730000  | -2.55690000 |
| N  | -0.81300800  | 0.40979000  | 0.18750800  | N  | -0.83070000  | 0.43130000  | 0.30730000  |
| C  | -0.19906200  | -0.74438400 | 0.63987700  | C  | -0.29140000  | -0.76880000 | 0.73520000  |
| C  | -1.18408100  | -1.72395000 | 0.68054500  | C  | -1.34220000  | -1.67570000 | 0.78050000  |
| C  | -2.35567200  | -1.05701400 | 0.23246500  | C  | -2.46970000  | -0.92450000 | 0.35580000  |
| C  | -3.73401900  | -1.61779500 | 0.09654000  | C  | -3.87790000  | -1.39930000 | 0.22740000  |
| O  | -3.96988300  | -2.79981000 | 0.32066200  | O  | -4.17810000  | -2.57590000 | 0.40270000  |
| N  | -4.67149300  | -0.71050900 | -0.28553600 | N  | -4.77630000  | -0.43050000 | -0.08400000 |
| C  | 1.22252400   | -0.83149300 | 0.95679200  | C  | 1.12260000   | -0.95610000 | 1.02090000  |
| C  | 1.79373800   | -1.28246900 | 2.12225400  | C  | 1.67510000   | -1.55470000 | 2.12750000  |
| S  | 2.45973500   | -0.43147900 | -0.21489100 | S  | 2.37210000   | -0.45350000 | -0.09650000 |
| C  | 3.20848900   | -1.30328400 | 2.09479800  | C  | 3.08820000   | -1.61200000 | 2.09770000  |
| H  | 1.20433000   | -1.56956100 | 2.98242400  | H  | 1.07320000   | -1.91280000 | 2.95110000  |
| C  | 3.74073600   | -0.86599100 | 0.90214100  | C  | 3.63530000   | -1.05230000 | 0.96400000  |
| H  | 3.82868400   | -1.61575600 | 2.92354900  | H  | 3.69840000   | -2.03380000 | 2.88420000  |
| Cl | -0.03852800  | 2.02085300  | 2.68052800  | Cl | 0.39780000   | 1.84810000  | 2.73560000  |
| Cl | 1.51058800   | 5.79262200  | -0.86264700 | Cl | 2.01080000   | 5.52190000  | -0.88260000 |
| H  | -4.35498000  | 0.23822500  | -0.43316400 | H  | -4.41850000  | 0.49900000  | -0.25460000 |

|   |             |             |             |   |             |             |             |
|---|-------------|-------------|-------------|---|-------------|-------------|-------------|
| N | -2.11961900 | 0.21968200  | -0.06384700 | N | -2.15070000 | 0.33670000  | 0.06830000  |
| C | -1.01852700 | -3.17292800 | 1.04204400  | C | -1.27910000 | -3.14070000 | 1.09830000  |
| H | -0.09962100 | -3.29383200 | 1.62045200  | H | -0.36610000 | -3.35170000 | 1.65880000  |
| H | -1.85333200 | -3.47256900 | 1.67864100  | H | -2.13020000 | -3.39890000 | 1.73110000  |
| C | 5.09358000  | -0.73991100 | 0.53134100  | C | 4.99110000  | -0.92010000 | 0.61070000  |
| C | 6.25155100  | -0.62467700 | 0.20500500  | C | 6.15060000  | -0.79340000 | 0.29650000  |
| C | 7.64963700  | -0.51171300 | -0.19369600 | C | 7.54740000  | -0.67440000 | -0.10170000 |
| C | 8.17997100  | -1.74877600 | -0.94922300 | C | 7.97490000  | -1.71630000 | -1.15650000 |
| H | 8.26266800  | -0.33897700 | 0.69932000  | H | 8.18290000  | -0.77270000 | 0.78680000  |
| H | 7.77100400  | 0.37909200  | -0.82221900 | H | 7.72540000  | 0.33460000  | -0.49360000 |
| C | 9.64947000  | -1.60446100 | -1.35737300 | C | 9.44460000  | -1.57040000 | -1.56090000 |
| H | 8.05442300  | -2.63271000 | -0.31506200 | H | 7.79570000  | -2.72050000 | -0.75800000 |
| H | 7.56118700  | -1.91432700 | -1.83747000 | H | 7.33400000  | -1.61340000 | -2.03860000 |
| H | 9.76544800  | -0.71134400 | -1.98333100 | H | 9.61450000  | -0.55880000 | -1.94930000 |
| H | 10.25865300 | -1.43046700 | -0.46207200 | H | 10.07660000 | -1.66620000 | -0.66960000 |
| C | -0.97632800 | -4.10018400 | -0.18476200 | C | -1.31970000 | -4.01220000 | -0.16840000 |
| H | -1.91552600 | -4.04000100 | -0.73584100 | H | -2.25690000 | -3.84860000 | -0.70170000 |
| H | -0.15394900 | -3.83232600 | -0.85389100 | H | -0.48410000 | -3.77380000 | -0.83240000 |
| H | -0.83370600 | -5.13809200 | 0.12877000  | H | -1.25680000 | -5.07200000 | 0.09350000  |
| C | 10.18379100 | -2.82699300 | -2.10855800 | C | 9.87430000  | -2.60130000 | -2.60810000 |
| H | 11.23282800 | -2.69552000 | -2.38644900 | H | 10.92560000 | -2.47850000 | -2.88150000 |
| H | 10.11304600 | -3.73024300 | -1.49499400 | H | 9.74350000  | -3.62080000 | -2.23270000 |
| H | 9.61642000  | -3.00588000 | -3.02692900 | H | 9.27840000  | -2.50600000 | -3.52100000 |
| C | -6.07879100 | -1.03629000 | -0.47861300 | C | -6.18790000 | -0.71310000 | -0.31110000 |
| C | -6.97102800 | -0.25179800 | 0.49881200  | C | -7.03920000 | 0.50200000  | 0.07560000  |
| C | -6.51083500 | -0.79746900 | -1.93577100 | C | -6.45680000 | -1.14370000 | -1.76360000 |
| H | -6.16029600 | -2.10317500 | -0.25487500 | H | -6.44150000 | -1.55300000 | 0.34330000  |
| C | -8.45848000 | -0.57061000 | 0.28760900  | C | -8.53210000 | 0.23450000  | -0.16290000 |
| H | -6.80293900 | 0.82359700  | 0.34920500  | H | -6.72520000 | 1.36390000  | -0.53000000 |
| H | -6.66843400 | -0.47931000 | 1.52505400  | H | -6.85240000 | 0.76110000  | 1.12210000  |
| C | -7.99882300 | -1.11589100 | -2.14392600 | C | -7.94950000 | -1.41380000 | -1.99630000 |
| H | -6.32221500 | 0.25341600  | -2.19513900 | H | -6.11430000 | -0.34470000 | -2.43400000 |
| H | -5.88882000 | -1.40403500 | -2.60048000 | H | -5.85940000 | -2.03210000 | -1.98380000 |
| C | -8.88751500 | -0.33359400 | -1.16698600 | C | -8.80320000 | -0.19740000 | -1.61130000 |
| H | -9.06868300 | 0.03128000  | 0.96829700  | H | -9.11520000 | 1.12630000  | 0.08630000  |
| H | -8.64167500 | -1.61984300 | 0.55174900  | H | -8.86580000 | -0.55880000 | 0.51770000  |
| H | -8.28525300 | -0.89888700 | -3.17780400 | H | -8.12320000 | -1.68800000 | -3.04140000 |

|    |             |             |             |    |             |             |             |
|----|-------------|-------------|-------------|----|-------------|-------------|-------------|
| H  | -8.15957400 | -2.19133300 | -1.99629500 | H  | -8.25660000 | -2.27660000 | -1.39160000 |
| H  | -9.93686400 | -0.61417300 | -1.30253600 | H  | -9.86640000 | -0.41940000 | -1.74630000 |
| H  | -8.81894400 | 0.73826100  | -1.39436800 | H  | -8.56730000 | 0.63620000  | -2.28560000 |
| 34 |             |             |             |    |             |             |             |
| C  | 1.51017700  | 3.38265000  | 1.12187200  | C  | 1.72700000  | 3.16910000  | 1.13850000  |
| C  | 0.76251100  | 2.21148700  | 1.20251100  | C  | 0.90410000  | 2.04850000  | 1.19240000  |
| C  | 0.12903300  | 1.69352800  | 0.06771100  | C  | 0.15720000  | 1.66390000  | 0.07370000  |
| C  | 0.22246200  | 2.39044600  | -1.13684800 | C  | 0.21470000  | 2.43990000  | -1.08300000 |
| C  | 0.95127700  | 3.56795500  | -1.23021100 | C  | 1.01740000  | 3.56990000  | -1.14670000 |
| C  | 1.59813800  | 4.04646600  | -0.09529800 | C  | 1.77670000  | 3.91540000  | -0.03260000 |
| H  | 2.00089400  | 3.77360000  | 2.00178400  | H  | 2.30860000  | 3.45680000  | 2.00260000  |
| H  | -0.28862800 | 1.99072900  | -2.00340900 | H  | -0.38080000 | 2.13550000  | -1.93400000 |
| H  | 1.02356800  | 4.10244900  | -2.16762900 | H  | 1.06490000  | 4.16800000  | -2.04640000 |
| N  | -0.64969600 | 0.50178900  | 0.11258600  | N  | -0.66970000 | 0.50840000  | 0.08270000  |
| C  | -0.24298500 | -0.80457100 | 0.32018900  | C  | -0.30020000 | -0.81790000 | 0.21830000  |
| C  | -1.39343400 | -1.58600100 | 0.27136200  | C  | -1.47480000 | -1.55860000 | 0.14790000  |
| C  | -2.43610900 | -0.65392100 | 0.02636700  | C  | -2.49120000 | -0.58500000 | -0.03170000 |
| C  | -3.89305400 | -0.93997500 | -0.14306300 | C  | -3.95520000 | -0.83130000 | -0.17500000 |
| O  | -4.34920400 | -2.07099600 | -0.03297700 | O  | -4.43330000 | -1.95570000 | -0.08540000 |
| N  | -4.63988000 | 0.16466200  | -0.43133400 | N  | -4.68770000 | 0.29360000  | -0.41350000 |
| C  | 1.14493100  | -1.20988800 | 0.48848200  | C  | 1.07230000  | -1.26960000 | 0.35900000  |
| C  | 1.64223900  | -2.11522000 | 1.39657500  | C  | 1.52450000  | -2.28740000 | 1.16650000  |
| S  | 2.42031700  | -0.65057100 | -0.57390100 | S  | 2.39080000  | -0.59550000 | -0.57630000 |
| C  | 3.02925900  | -2.35796700 | 1.26204200  | C  | 2.91340000  | -2.52900000 | 1.05490000  |
| H  | 1.02449000  | -2.57396600 | 2.15600600  | H  | 0.87180000  | -2.82410000 | 1.84020000  |
| C  | 3.61596000  | -1.64057200 | 0.24340200  | C  | 3.54380000  | -1.69650000 | 0.15690000  |
| H  | 3.59365700  | -3.02731900 | 1.89646000  | H  | 3.44930000  | -3.27770000 | 1.62140000  |
| Cl | 0.60813100  | 1.43015200  | 2.75542600  | Cl | 0.81570000  | 1.15010000  | 2.68560000  |
| Cl | 2.53688900  | 5.52444200  | -0.19243400 | Cl | 2.81480000  | 5.32760000  | -0.09730000 |
| H  | -4.17254600 | 1.05869700  | -0.48516500 | H  | -4.21300000 | 1.18430000  | -0.44820000 |
| N  | -1.97843900 | 0.59260200  | -0.07461300 | N  | -1.99750000 | 0.65180000  | -0.07990000 |
| C  | -6.44964400 | -0.57220500 | -1.81861500 | C  | -6.54400000 | -0.39940000 | -1.75110000 |
| C  | -6.77974000 | -0.19706400 | 0.58961000  | C  | -6.78520000 | -0.08520000 | 0.67440000  |
| C  | -7.93020000 | -0.30027300 | -2.09467100 | C  | -8.03490000 | -0.13000000 | -1.96410000 |
| H  | -6.27710600 | -1.65029000 | -1.69099600 | H  | -6.36200000 | -1.47830000 | -1.64900000 |
| H  | -5.83422700 | -0.22893800 | -2.65364700 | H  | -5.96000000 | -0.03620000 | -2.60000000 |
| C  | -8.26816100 | 0.08483600  | 0.37226600  | C  | -8.28160000 | 0.19260000  | 0.51950000  |

|    |             |             |             |   |             |             |             |
|----|-------------|-------------|-------------|---|-------------|-------------|-------------|
| H  | -6.62495900 | -1.25617200 | 0.83957100  | H | -6.61510000 | -1.15020000 | 0.88520000  |
| H  | -6.39173600 | 0.40462900  | 1.41495200  | H | -6.36750000 | 0.49480000  | 1.50070000  |
| C  | -8.79033900 | -0.64466700 | -0.87206300 | C | -8.84240000 | -0.51810000 | -0.71890000 |
| H  | -8.24594500 | -0.88231600 | -2.96631900 | H | -8.38000000 | -0.68800000 | -2.84020000 |
| H  | -8.05642100 | 0.75888300  | -2.34567400 | H | -8.17720000 | 0.93570000  | -2.17540000 |
| H  | -8.82558800 | -0.22179800 | 1.26301500  | H | -8.80390000 | -0.13350000 | 1.42430000  |
| H  | -8.41187600 | 1.16450000  | 0.25239600  | H | -8.43470000 | 1.27330000  | 0.42240000  |
| H  | -9.83800900 | -0.38739400 | -1.05580400 | H | -9.90050000 | -0.27540000 | -0.85560000 |
| H  | -8.75546700 | -1.72746100 | -0.69823200 | H | -8.77930000 | -1.60350000 | -0.57160000 |
| N  | -6.02830100 | 0.17877800  | -0.62207800 | N | -6.08150000 | 0.32800000  | -0.55450000 |
| C  | -1.49091500 | -3.07886700 | 0.39886000  | C | -1.62440000 | -3.04840000 | 0.21820000  |
| H  | -2.18878000 | -3.44591900 | -0.35594800 | H | -2.35680000 | -3.35890000 | -0.52880000 |
| H  | -0.51021800 | -3.51319200 | 0.18395400  | H | -0.66670000 | -3.51190000 | -0.03580000 |
| C  | 4.96450800  | -1.62063600 | -0.16212000 | C | 4.90620000  | -1.63980000 | -0.19020000 |
| C  | 6.11908800  | -1.59775900 | -0.52081500 | C | 6.07200000  | -1.57560000 | -0.50170000 |
| C  | -1.98105000 | -3.55109500 | 1.77840100  | C | -2.10200000 | -3.53540000 | 1.59640000  |
| H  | -2.00682000 | -4.64355100 | 1.81933600  | H | -2.16970000 | -4.62650000 | 1.61660000  |
| H  | -1.32847000 | -3.19692300 | 2.58179700  | H | -1.42000000 | -3.22000000 | 2.39170000  |
| H  | -2.99022500 | -3.18180600 | 1.96507100  | H | -3.09160000 | -3.12810000 | 1.80770000  |
| C  | 7.52383800  | -1.57395000 | -0.95056100 | C | 7.48930000  | -1.50030000 | -0.87480000 |
| C  | 7.69444100  | -0.51420100 | -2.06371500 | C | 7.67540000  | -0.38360000 | -1.92740000 |
| C  | 8.42230400  | -1.21219200 | 0.25547000  | C | 8.33360000  | -1.17910000 | 0.38010000  |
| C  | 7.91772600  | -2.96787300 | -1.49347300 | C | 7.93580000  | -2.85610000 | -1.46930000 |
| H  | 7.06687400  | -0.74960100 | -2.92621000 | H | 7.08590000  | -0.59080000 | -2.82340000 |
| H  | 7.41981200  | 0.47931400  | -1.70231000 | H | 7.36380000  | 0.58420000  | -1.52780000 |
| H  | 8.73703300  | -0.48544000 | -2.39338200 | H | 8.72890000  | -0.31660000 | -2.21410000 |
| H  | 8.31394700  | -1.94669300 | 1.05670300  | H | 8.21280000  | -1.95510000 | 1.13940000  |
| H  | 9.47148100  | -1.19171800 | -0.05378200 | H | 9.39230000  | -1.12070000 | 0.11070000  |
| H  | 8.16107600  | -0.23007200 | 0.65562600  | H | 8.03410000  | -0.22350000 | 0.81630000  |
| H  | 8.96307700  | -2.96084800 | -1.81605800 | H | 8.99200000  | -2.80850000 | -1.75060000 |
| H  | 7.80014000  | -3.73381900 | -0.72362500 | H | 7.80830000  | -3.66090000 | -0.74170000 |
| H  | 7.29484500  | -3.24418600 | -2.34704600 | H | 7.35130000  | -3.10250000 | -2.35850000 |
| 35 |             |             |             |   |             |             |             |
| C  | 0.98539200  | 2.98206400  | 1.32584500  | C | 1.26950000  | 2.82520000  | 1.53710000  |
| C  | 0.50159700  | 1.67748500  | 1.35977400  | C | 0.69190000  | 1.56030000  | 1.58720000  |
| C  | -0.03926000 | 1.08964900  | 0.21098300  | C | -0.10170000 | 1.10180000  | 0.53030000  |
| C  | -0.12424600 | 1.84460000  | -0.95886400 | C | -0.34260000 | 1.94370000  | -0.55530000 |

|    |             |             |             |    |             |             |             |
|----|-------------|-------------|-------------|----|-------------|-------------|-------------|
| C  | 0.33952300  | 3.15206100  | -1.00506100 | C  | 0.21180000  | 3.21440000  | -0.61130000 |
| C  | 0.90069400  | 3.70404800  | 0.14201700  | C  | 1.02500000  | 3.63700000  | 0.43630000  |
| H  | 1.40669700  | 3.42693100  | 2.21606200  | H  | 1.88920000  | 3.17070000  | 2.35210000  |
| H  | -0.56182300 | 1.38576400  | -1.83631100 | H  | -0.97230000 | 1.57870000  | -1.35650000 |
| H  | 0.27472100  | 3.73157800  | -1.91592000 | H  | 0.02780000  | 3.86410000  | -1.45600000 |
| N  | -0.55069100 | -0.23910900 | 0.20976500  | N  | -0.69090000 | -0.19050000 | 0.53410000  |
| C  | 0.12470900  | -1.43988100 | 0.33935700  | C  | -0.07610000 | -1.42950000 | 0.51510000  |
| C  | -0.83978800 | -2.44016900 | 0.27334100  | C  | -1.09890000 | -2.37130000 | 0.47120000  |
| C  | -2.06026300 | -1.73884100 | 0.10096600  | C  | -2.28730000 | -1.59950000 | 0.46010000  |
| C  | -3.43323500 | -2.31367800 | -0.03796600 | C  | -3.69910000 | -2.07630000 | 0.36210000  |
| O  | -3.62614200 | -3.52322700 | -0.02201600 | O  | -3.98050000 | -3.24930000 | 0.14570000  |
| N  | -4.41293800 | -1.38063000 | -0.18014200 | N  | -4.62200000 | -1.09250000 | 0.50650000  |
| C  | 1.56801100  | -1.56058900 | 0.47343700  | C  | 1.36040000  | -1.63160000 | 0.49850000  |
| C  | 2.25020300  | -2.41566300 | 1.30773000  | C  | 2.05380000  | -2.62620000 | 1.14870000  |
| S  | 2.68971200  | -0.66801400 | -0.53282500 | S  | 2.44980000  | -0.64310000 | -0.45190000 |
| C  | 3.65582200  | -2.35741600 | 1.16179200  | C  | 3.44700000  | -2.60070000 | 0.90760000  |
| H  | 1.74720700  | -3.05132700 | 2.02329800  | H  | 1.56740000  | -3.33650000 | 1.80240000  |
| C  | 4.07182000  | -1.45533700 | 0.20795600  | C  | 3.83800000  | -1.58440000 | 0.06440000  |
| H  | 4.35243800  | -2.94605700 | 1.74259100  | H  | 4.15420000  | -3.29250000 | 1.34360000  |
| Cl | 0.55710600  | 0.81031300  | 2.87328800  | Cl | 0.96720000  | 0.57390000  | 3.00010000  |
| Cl | 1.50634300  | 5.34948500  | 0.10375200  | Cl | 1.75320000  | 5.23170000  | 0.37720000  |
| H  | -4.11730800 | -0.41575100 | -0.16604300 | H  | -4.26890000 | -0.15930000 | 0.65220000  |
| N  | -1.87532000 | -0.42094600 | 0.05655000  | N  | -2.03170000 | -0.29160000 | 0.48660000  |
| C  | -0.62625500 | -3.92107000 | 0.32344000  | C  | -0.96760000 | -3.85990000 | 0.40210000  |
| H  | -0.80793100 | -4.31379500 | 1.32916300  | H  | -1.00000000 | -4.30570000 | 1.40200000  |
| H  | -1.32834200 | -4.42647800 | -0.33757500 | H  | -1.79810000 | -4.28100000 | -0.16130000 |
| H  | 0.39772900  | -4.17498200 | 0.04145100  | H  | -0.01880000 | -4.14290000 | -0.05950000 |
| C  | 5.38303100  | -1.12762400 | -0.18781100 | C  | 5.13150000  | -1.24950000 | -0.37660000 |
| C  | 6.50452100  | -0.84106800 | -0.53774300 | C  | 6.23410000  | -0.94590000 | -0.76700000 |
| C  | 7.86983400  | -0.49683200 | -0.95729700 | C  | 7.57540000  | -0.57970000 | -1.23640000 |
| C  | -5.82508900 | -1.72380900 | -0.32552700 | C  | -6.04380000 | -1.29850000 | 0.23150000  |
| C  | -6.72299900 | -1.01348200 | 0.71340900  | C  | -6.84190000 | -0.03450000 | 0.59530000  |
| C  | -6.42503300 | -1.26221700 | -1.67442900 | C  | -6.32190000 | -1.46020000 | -1.27840000 |
| H  | -5.86034900 | -2.80745300 | -0.22090100 | H  | -6.36320000 | -2.17940000 | 0.79130000  |
| H  | -6.23227200 | -0.92303200 | 1.68527200  | H  | -6.49460000 | 0.42730000  | 1.52390000  |
| H  | -7.62005000 | -1.62317300 | 0.85960800  | H  | -7.88410000 | -0.32530000 | 0.75210000  |
| C  | -6.90753300 | 0.19036500  | -1.45888200 | C  | -6.34720000 | -0.02470000 | -1.84230000 |

|    |             |             |             |   |             |             |             |
|----|-------------|-------------|-------------|---|-------------|-------------|-------------|
| H  | -7.27901600 | -1.90720700 | -1.90470500 | H | -7.30250000 | -1.93250000 | -1.39770000 |
| H  | -5.71177700 | -1.36431400 | -2.49552300 | H | -5.58710000 | -2.11030000 | -1.75550000 |
| H  | -7.85243700 | 0.35445900  | -1.98305400 | H | -7.09270000 | 0.06040000  | -2.63700000 |
| C  | -7.11036500 | 0.35015700  | 0.09431100  | C | -6.73190000 | 0.90420000  | -0.63220000 |
| C  | -6.23683200 | 1.56216300  | 0.50690500  | C | -5.62920000 | 1.99260000  | -0.56860000 |
| C  | -6.07804600 | 2.38499000  | -0.78147200 | C | -5.01150000 | 2.00660000  | -1.97630000 |
| H  | -5.25250700 | 1.22820300  | 0.85474500  | H | -4.85670000 | 1.72800000  | 0.16180000  |
| H  | -6.67849500 | 2.13110700  | 1.32893900  | H | -6.02240000 | 2.96500000  | -0.26180000 |
| C  | -5.91453300 | 1.30801800  | -1.86536300 | C | -4.99700000 | 0.52120000  | -2.36620000 |
| H  | -6.98742100 | 2.96794300  | -0.96767800 | H | -5.65560000 | 2.56920000  | -2.66200000 |
| H  | -5.24237700 | 3.08871000  | -0.74243900 | H | -4.02140000 | 2.47010000  | -2.00200000 |
| H  | -6.10111900 | 1.68139500  | -2.87560300 | H | -4.87130000 | 0.35700000  | -3.43940000 |
| H  | -4.88631600 | 0.92882600  | -1.85649800 | H | -4.16650000 | 0.02070000  | -1.86070000 |
| H  | -8.15519700 | 0.57941800  | 0.31798800  | H | -7.69340000 | 1.38920000  | -0.81540000 |
| C  | 7.95816300  | -0.54649600 | -2.50075200 | C | 7.52310000  | -0.29160000 | -2.75460000 |
| H  | 8.97133600  | -0.29084500 | -2.82468300 | H | 8.51880000  | -0.01630000 | -3.11470000 |
| H  | 7.71807400  | -1.54476900 | -2.87322700 | H | 7.18640000  | -1.17200000 | -3.30650000 |
| H  | 7.26259100  | 0.16317200  | -2.95437200 | H | 6.83810000  | 0.53130000  | -2.97120000 |
| C  | 8.85965700  | -1.51544700 | -0.34587900 | C | 8.54680000  | -1.75020000 | -0.96140000 |
| H  | 9.88127600  | -1.27079000 | -0.65079500 | H | 9.55060000  | -1.48780000 | -1.30780000 |
| H  | 8.81262500  | -1.49860400 | 0.74531000  | H | 8.59710000  | -1.97160000 | 0.10710000  |
| H  | 8.63314000  | -2.52972600 | -0.68205000 | H | 8.22560000  | -2.65380000 | -1.48450000 |
| C  | 8.21550000  | 0.92736500  | -0.46197200 | C | 8.05510000  | 0.68330000  | -0.48380000 |
| H  | 7.52498700  | 1.66371000  | -0.87923800 | H | 7.37930000  | 1.52270000  | -0.66240000 |
| H  | 8.15868100  | 0.98585900  | 0.62720900  | H | 8.09860000  | 0.50170000  | 0.59240000  |
| H  | 9.23100100  | 1.19340800  | -0.77005100 | H | 9.05470000  | 0.96430000  | -0.82860000 |
| 36 |             |             |             |   |             |             |             |
| C  | 1.99166100  | 3.12087700  | 1.14889300  | C | 2.19030000  | 2.90930000  | 1.14050000  |
| C  | 1.18581600  | 1.98697000  | 1.19330300  | C | 1.31480000  | 1.82830000  | 1.16560000  |
| C  | 0.49051300  | 1.56454400  | 0.05511500  | C | 0.51460000  | 1.53900000  | 0.05500000  |
| C  | 0.58336900  | 2.31980000  | -1.11377400 | C | 0.57420000  | 2.37060000  | -1.06220000 |
| C  | 1.37057500  | 3.46154200  | -1.17000200 | C | 1.42990000  | 3.46250000  | -1.09610000 |
| C  | 2.07680900  | 3.84416700  | -0.03411400 | C | 2.24010000  | 3.71240000  | 0.00760000  |
| H  | 2.52950700  | 3.43799500  | 2.03096400  | H | 2.81220000  | 3.12340000  | 1.99780000  |
| H  | 0.02522100  | 1.99425300  | -1.98233000 | H | -0.06220000 | 2.14020000  | -1.90690000 |
| H  | 1.44215500  | 4.04138000  | -2.08012400 | H | 1.47890000  | 4.10360000  | -1.96550000 |
| N  | -0.34911100 | 0.41402700  | 0.06409300  | N | -0.36870000 | 0.42630000  | 0.03420000  |



|    |             |             |             |    |             |             |             |
|----|-------------|-------------|-------------|----|-------------|-------------|-------------|
| C  | -0.00695600 | -0.92093000 | 0.18989600  | C  | -0.06260000 | -0.92170000 | 0.09120000  |
| C  | -1.19896800 | -1.63758400 | 0.14199200  | C  | -1.27480000 | -1.59960000 | 0.02560000  |
| C  | -2.19720000 | -0.64061200 | -0.01763000 | C  | -2.24590000 | -0.56950000 | -0.07010000 |
| C  | -3.67224000 | -0.84091800 | -0.14978200 | C  | -3.72440000 | -0.73640000 | -0.17450000 |
| O  | -4.18514100 | -1.95049300 | -0.07809700 | O  | -4.25560000 | -1.83910000 | -0.12410000 |
| N  | -4.36698700 | 0.31429700  | -0.35909700 | N  | -4.40640000 | 0.43380000  | -0.33130000 |
| C  | 1.36186700  | -1.40662700 | 0.28640200  | C  | 1.28930000  | -1.44640000 | 0.16100000  |
| C  | 1.83649500  | -2.39031800 | 1.12324300  | C  | 1.71480000  | -2.52380000 | 0.90400000  |
| S  | 2.63150200  | -0.85251300 | -0.78389900 | S  | 2.60780000  | -0.79410000 | -0.78750000 |
| C  | 3.20269200  | -2.69756500 | 0.92726500  | C  | 3.08480000  | -2.82740000 | 0.73290000  |
| H  | 1.21805500  | -2.86072400 | 1.87490300  | H  | 1.05780000  | -3.05930000 | 1.57440000  |
| C  | 3.79735600  | -1.95261700 | -0.06737100 | C  | 3.72860000  | -1.98480000 | -0.14690000 |
| H  | 3.74899400  | -3.43339900 | 1.50105600  | H  | 3.60030000  | -3.62830000 | 1.24440000  |
| Cl | 1.03933200  | 1.13121900  | 2.70733700  | Cl | 1.22880000  | 0.85850000  | 2.61370000  |
| Cl | 3.08920600  | 5.27510300  | -0.08535000 | Cl | 3.34470000  | 5.07460000  | -0.02080000 |
| H  | -3.85397100 | 1.18417400  | -0.38594900 | H  | -3.88860000 | 1.30080000  | -0.33870000 |
| N  | -1.67646300 | 0.58392700  | -0.07043800 | N  | -1.69210000 | 0.64250000  | -0.07420000 |
| C  | -6.25870100 | -0.25764300 | -1.71446700 | C  | -6.33730000 | -0.09770000 | -1.63690000 |
| C  | -6.48864900 | 0.01627700  | 0.71879700  | C  | -6.48440000 | 0.10220000  | 0.80820000  |
| C  | -7.73048200 | 0.10528600  | -1.92499200 | C  | -7.81870000 | 0.25470000  | -1.78440000 |
| H  | -6.14126100 | -1.34827300 | -1.64361200 | H  | -6.20680000 | -1.18800000 | -1.59520000 |
| H  | -5.65311000 | 0.09277200  | -2.55369700 | H  | -5.76320000 | 0.27990000  | -2.48630000 |
| C  | -7.96590100 | 0.38657800  | 0.56785000  | C  | -7.96900000 | 0.46040000  | 0.71930000  |
| H  | -6.38346900 | -1.06047600 | 0.91301400  | H  | -6.36160000 | -0.97930000 | 0.95940000  |
| H  | -6.04167000 | 0.55560900  | 1.55731700  | H  | -6.01150000 | 0.61760000  | 1.64750000  |
| C  | -8.56758100 | -0.25251000 | -0.69025600 | C  | -8.60440000 | -0.15720000 | -0.53290000 |
| H  | -8.10583000 | -0.41611300 | -2.81127600 | H  | -8.21960000 | -0.23980000 | -2.67470000 |
| H  | -7.80704400 | 1.18059700  | -2.12145400 | H  | -7.91380000 | 1.33570000  | -1.93720000 |
| H  | -8.50964400 | 0.06650300  | 1.46232000  | H  | -8.47780000 | 0.11380000  | 1.62420000  |
| H  | -8.05450300 | 1.47689500  | 0.50418200  | H  | -8.07040000 | 1.55090000  | 0.68180000  |
| H  | -9.60513500 | 0.06845700  | -0.82450200 | H  | -9.65280000 | 0.14350000  | -0.62060000 |
| H  | -8.58606000 | -1.34284200 | -0.56898900 | H  | -8.59150000 | -1.25060000 | -0.44230000 |
| N  | -5.75813100 | 0.41083400  | -0.49968700 | N  | -5.80040000 | 0.54350000  | -0.42210000 |
| C  | -1.37327700 | -3.12795700 | 0.19551900  | C  | -1.49720000 | -3.08190000 | 0.02720000  |
| H  | -2.11620200 | -3.41642600 | -0.55032500 | H  | -2.26800000 | -3.31740000 | -0.70850000 |
| H  | -0.42606100 | -3.60137900 | -0.07872200 | H  | -0.57300000 | -3.57820000 | -0.28260000 |
| C  | 5.13035200  | -1.98033300 | -0.51647900 | C  | 5.07920000  | -1.97970000 | -0.53710000 |

|    |             |             |             |   |             |             |             |
|----|-------------|-------------|-------------|---|-------------|-------------|-------------|
| C  | 6.27341400  | -1.99460400 | -0.91401300 | C | 6.23720000  | -1.95710000 | -0.88630000 |
| C  | -1.84009800 | -3.64718600 | 1.56624200  | C | -1.95450000 | -3.61510000 | 1.39520000  |
| H  | -1.92345200 | -4.73742500 | 1.55162100  | H | -2.07670000 | -4.70120000 | 1.36320000  |
| H  | -1.14196100 | -3.37104300 | 2.36191300  | H | -1.23220000 | -3.37500000 | 2.18110000  |
| H  | -2.82074400 | -3.23626900 | 1.80937800  | H | -2.91490000 | -3.17130000 | 1.66070000  |
| C  | 7.62668100  | -2.02252900 | -1.38501500 | C | 7.61180000  | -1.93130000 | -1.28890000 |
| C  | 8.47612300  | -0.75865900 | -1.34807000 | C | 8.40970000  | -0.63830000 | -1.17690000 |
| C  | 8.78220500  | -1.88011800 | -0.40314700 | C | 8.70750000  | -1.77160000 | -0.24230000 |
| H  | 7.80429500  | -2.68373600 | -2.22766000 | H | 7.85530000  | -2.56580000 | -2.13580000 |
| H  | 8.01027700  | 0.13253900  | -0.94791900 | H | 7.88860000  | 0.22490000  | -0.78270000 |
| H  | 9.13988700  | -0.59014900 | -2.18716000 | H | 9.11090000  | -0.42440000 | -1.97440000 |
| H  | 9.65852700  | -2.48966200 | -0.58639200 | H | 9.61530000  | -2.34350000 | -0.39170000 |
| H  | 8.52475100  | -1.75216100 | 0.64027800  | H | 8.38900000  | -1.68010000 | 0.78840000  |
| 37 |             |             |             |   |             |             |             |
| C  | 1.46195300  | 2.96183000  | 0.88936400  | C | 1.58380000  | 2.79910000  | 0.83340000  |
| C  | 0.87899400  | 1.69905900  | 0.94077100  | C | 0.93200000  | 1.57050000  | 0.86780000  |
| C  | 0.36916400  | 1.10366000  | -0.21824400 | C | 0.32060000  | 1.06020000  | -0.28270000 |
| C  | 0.41695800  | 1.81150100  | -1.41919800 | C | 0.33680000  | 1.81590000  | -1.45400000 |
| C  | 0.98126700  | 3.07795400  | -1.48438200 | C | 0.96800000  | 3.05090000  | -1.49980000 |
| C  | 1.50840800  | 3.63622200  | -0.32429100 | C | 1.59670000  | 3.52420000  | -0.35190000 |
| H  | 1.85811300  | 3.41261100  | 1.78811900  | H | 2.06160000  | 3.18460000  | 1.72260000  |
| H  | 0.00237200  | 1.34858700  | -2.30562100 | H | -0.15320000 | 1.41210000  | -2.33060000 |
| H  | 1.01934500  | 3.62066000  | -2.41910600 | H | 0.98420000  | 3.63350000  | -2.41070000 |
| N  | -0.24188000 | -0.18227100 | -0.20297100 | N | -0.33290000 | -0.20090000 | -0.29020000 |
| C  | 0.32882000  | -1.42327300 | 0.01870100  | C | 0.20740000  | -1.45890000 | -0.09600000 |
| C  | -0.70414600 | -2.35066100 | -0.07284200 | C | -0.84990000 | -2.35680000 | -0.19800000 |
| C  | -1.85275300 | -1.56838700 | -0.35512600 | C | -1.97850000 | -1.54140000 | -0.46090000 |
| C  | -3.25442400 | -2.04294700 | -0.56260200 | C | -3.39460000 | -1.97510000 | -0.64490000 |
| O  | -3.55280900 | -3.22988500 | -0.49555600 | O | -3.74050000 | -3.14250000 | -0.50190000 |
| N  | -4.14900300 | -1.05609800 | -0.82667800 | N | -4.24740000 | -0.97060000 | -0.96600000 |
| C  | 1.74695800  | -1.64588700 | 0.25295700  | C | 1.61660000  | -1.71740000 | 0.13200000  |
| C  | 2.30500500  | -2.52097100 | 1.15687300  | C | 2.14650000  | -2.67260000 | 0.96970000  |
| S  | 2.99654200  | -0.87522100 | -0.70034700 | S | 2.89090000  | -0.86370000 | -0.71140000 |
| C  | 3.71690000  | -2.57357600 | 1.10455600  | C | 3.55900000  | -2.72180000 | 0.95510000  |
| H  | 1.70863900  | -3.09208500 | 1.85486600  | H | 1.52720000  | -3.29910000 | 1.59590000  |
| C  | 4.26408800  | -1.73867700 | 0.15509800  | C | 4.13180000  | -1.80410000 | 0.10170000  |
| H  | 4.32686500  | -3.19306300 | 1.74747000  | H | 4.15210000  | -3.39580000 | 1.55740000  |

|    |             |             |             |    |             |             |             |
|----|-------------|-------------|-------------|----|-------------|-------------|-------------|
| Cl | 0.77242500  | 0.89578500  | 2.48652900  | Cl | 0.88290000  | 0.69400000  | 2.37580000  |
| Cl | 2.23903500  | 5.22941500  | -0.38484600 | Cl | 2.41830000  | 5.07340000  | -0.39190000 |
| H  | -3.78900000 | -0.11574900 | -0.89077000 | H  | -3.85760000 | -0.04320000 | -1.03450000 |
| N  | -1.56409500 | -0.27100100 | -0.43774100 | N  | -1.65810000 | -0.24890000 | -0.52020000 |
| C  | -0.61079500 | -3.83984100 | 0.04954200  | C  | -0.79500000 | -3.84820000 | -0.09760000 |
| H  | -0.87392000 | -4.17166500 | 1.05923500  | H  | -0.99770000 | -4.18090000 | 0.92560000  |
| H  | -1.31575400 | -4.31938000 | -0.62743300 | H  | -1.56000000 | -4.29670000 | -0.72860000 |
| H  | 0.40300700  | -4.18421300 | -0.16545600 | H  | 0.19200000  | -4.21870000 | -0.38400000 |
| C  | 5.61838900  | -1.52438200 | -0.15974500 | C  | 5.49350000  | -1.56190000 | -0.15010000 |
| C  | 6.77922600  | -1.33105400 | -0.44255100 | C  | 6.65950000  | -1.33710000 | -0.38140000 |
| C  | -5.56007600 | -1.33416900 | -1.10099500 | C  | -5.69340000 | -1.17000000 | -1.06330000 |
| C  | -6.39584200 | -1.54158700 | 0.18263400  | C  | -6.34760000 | -1.36700000 | 0.32080000  |
| C  | -6.24081900 | -0.12605100 | -1.77378600 | C  | -6.37400000 | 0.10550000  | -1.58940000 |
| H  | -5.58885400 | -2.22877400 | -1.72606200 | H  | -5.86160000 | -2.03630000 | -1.70640000 |
| H  | -5.84476700 | -2.10681500 | 0.93602500  | H  | -5.75390000 | -2.02670000 | 0.95490000  |
| H  | -7.27981000 | -2.13213300 | -0.08029700 | H  | -7.32160000 | -1.84500000 | 0.17320000  |
| C  | -6.75528200 | 0.78323900  | -0.63005000 | C  | -6.58930000 | 1.01320000  | -0.35330000 |
| H  | -7.08448700 | -0.49874300 | -2.36123900 | H  | -7.33870000 | -0.17850000 | -2.01820000 |
| H  | -5.57593200 | 0.39260400  | -2.47073900 | H  | -5.80020000 | 0.58960000  | -2.38510000 |
| H  | -7.75100800 | 1.15896900  | -0.87802000 | H  | -7.56650000 | 1.49770000  | -0.41420000 |
| C  | -6.81873700 | -0.13200600 | 0.64847900  | C  | -6.52910000 | 0.05390000  | 0.89240000  |
| C  | -5.89627000 | 0.54928300  | 1.68790300  | C  | -5.36640000 | 0.58610000  | 1.76350000  |
| C  | -5.90553900 | 2.03345000  | 1.29260700  | C  | -5.28790000 | 2.08040000  | 1.41960000  |
| H  | -4.87906500 | 0.15435500  | 1.60335400  | H  | -4.42960000 | 0.09840000  | 1.47950000  |
| H  | -6.22653300 | 0.37389200  | 2.71503700  | H  | -5.52260000 | 0.39450000  | 2.82800000  |
| C  | -5.85343100 | 1.98385100  | -0.24308200 | C  | -5.51050000 | 2.09790000  | -0.10110000 |
| H  | -6.83960400 | 2.50455700  | 1.62046100  | H  | -6.09640000 | 2.62480000  | 1.92160000  |
| H  | -5.08176500 | 2.60265800  | 1.73118100  | H  | -4.34420000 | 2.54330000  | 1.71930000  |
| H  | -6.17586900 | 2.91533600  | -0.71559400 | H  | -5.80870000 | 3.07770000  | -0.48260000 |
| H  | -4.81947100 | 1.81314300  | -0.56447600 | H  | -4.57190000 | 1.84170000  | -0.60510000 |
| H  | -7.83719000 | -0.15576100 | 1.04524500  | H  | -7.45730000 | 0.11930000  | 1.46570000  |
| C  | 8.15554000  | -1.11283100 | -0.77746000 | C  | 8.04230000  | -1.07080000 | -0.64420000 |
| C  | 8.75403200  | 0.28469200  | -0.68238300 | C  | 8.57770000  | 0.34990000  | -0.51750000 |
| C  | 9.16163200  | -0.76064800 | 0.31030100  | C  | 8.97150000  | -0.67970000 | 0.49820000  |
| H  | 8.53373500  | -1.73199900 | -1.58517900 | H  | 8.48640000  | -1.67530000 | -1.42940000 |
| H  | 8.09670100  | 1.07680300  | -0.34796300 | H  | 7.87030000  | 1.11410000  | -0.22160000 |
| H  | 9.45721100  | 0.56985700  | -1.45522700 | H  | 9.31120000  | 0.66460000  | -1.24990000 |

|    |             |             |             |    |             |             |             |
|----|-------------|-------------|-------------|----|-------------|-------------|-------------|
| H  | 10.14777000 | -1.20061800 | 0.22643100  | H  | 9.97820000  | -1.07890000 | 0.47000000  |
| H  | 8.78179300  | -0.67998000 | 1.32055400  | H  | 8.53210000  | -0.61650000 | 1.48550000  |
| 38 |             |             |             |    |             |             |             |
| C  | 0.75484800  | 3.40044400  | 0.97936700  | C  | 0.96329500  | 3.21188800  | 1.01632900  |
| C  | 0.15965100  | 2.15006900  | 1.11874200  | C  | 0.29764100  | 1.99421400  | 1.11619900  |
| C  | -0.41245800 | 1.50799100  | 0.01504400  | C  | -0.39384900 | 1.47225800  | 0.01745700  |
| C  | -0.41445000 | 2.15796600  | -1.21914500 | C  | -0.44264600 | 2.20647900  | -1.16674400 |
| C  | 0.16115600  | 3.41176700  | -1.37147200 | C  | 0.20150600  | 3.43061600  | -1.27662100 |
| C  | 0.75070900  | 4.01626300  | -0.26585300 | C  | 0.90980500  | 3.91501500  | -0.18087500 |
| H  | 1.19961200  | 3.88716500  | 1.83562900  | H  | 1.50338600  | 3.60577100  | 1.86530100  |
| H  | -0.87726200 | 1.65987100  | -2.06153900 | H  | -0.99399700 | 1.79422200  | -2.00195200 |
| H  | 0.16035500  | 3.90940500  | -2.33171100 | H  | 0.16700000  | 3.99626400  | -2.19766600 |
| N  | -1.03642600 | 0.23262500  | 0.12025800  | N  | -1.06157300 | 0.21991100  | 0.07398500  |
| C  | -0.46920200 | -1.00400400 | 0.37298400  | C  | -0.52316000 | -1.04108000 | 0.25442000  |
| C  | -1.51461000 | -1.92144800 | 0.37132500  | C  | -1.59187300 | -1.92951100 | 0.21977000  |
| C  | -2.66729300 | -1.13827500 | 0.10587800  | C  | -2.72649400 | -1.10551400 | 0.00789300  |
| C  | -4.07970300 | -1.61907400 | -0.01186300 | C  | -4.14889000 | -1.54903900 | -0.11028800 |
| O  | -4.37323500 | -2.79192900 | 0.12876900  | O  | -4.47347800 | -2.71312100 | 0.03755600  |
| N  | -4.96577700 | -0.61203900 | -0.29065800 | N  | -5.00992600 | -0.52353000 | -0.40093900 |
| C  | 0.95591400  | -1.23290700 | 0.55313100  | C  | 0.89420000  | -1.31038500 | 0.40909000  |
| C  | 1.54810300  | -2.06185500 | 1.47769000  | C  | 1.46285200  | -2.24727800 | 1.24081700  |
| S  | 2.16677600  | -0.53429300 | -0.50200900 | S  | 2.12641200  | -0.49424000 | -0.53063300 |
| C  | 2.95567300  | -2.13597600 | 1.36136100  | C  | 2.87206300  | -2.31351400 | 1.14544600  |
| H  | 0.98042500  | -2.58429100 | 2.23527800  | H  | 0.87497600  | -2.84897200 | 1.91955600  |
| C  | 3.46374900  | -1.36385300 | 0.34020100  | C  | 3.40179800  | -1.42608500 | 0.23472400  |
| H  | 3.58934300  | -2.72523700 | 2.00968000  | H  | 3.49247600  | -2.97735700 | 1.73120700  |
| Cl | 0.11691000  | 1.42286700  | 2.70472800  | Cl | 0.33393300  | 1.14710700  | 2.64134000  |
| Cl | 1.49684200  | 5.59418700  | -0.43716300 | Cl | 1.74896600  | 5.45062700  | -0.30338900 |
| H  | -4.60788900 | 0.33818300  | -0.35052400 | H  | -4.64597600 | 0.42652900  | -0.37617400 |
| N  | -2.36894500 | 0.15018500  | -0.05055800 | N  | -2.39740700 | 0.18243600  | -0.08657600 |
| C  | -1.42909900 | -3.40442300 | 0.55700800  | C  | -1.54041600 | -3.42023600 | 0.33148200  |
| H  | -1.67550800 | -3.68987100 | 1.58479100  | H  | -1.72665900 | -3.74431100 | 1.36049800  |
| H  | -2.14991400 | -3.90884200 | -0.08439200 | H  | -2.31752300 | -3.87207100 | -0.28219400 |
| H  | -0.42190600 | -3.76481500 | 0.33767500  | H  | -0.55977000 | -3.79551900 | 0.03027400  |
| C  | 4.80398500  | -1.18587500 | -0.05183700 | C  | 4.74960700  | -1.20722300 | -0.10302100 |
| C  | 5.95051500  | -1.02658300 | -0.40209700 | C  | 5.90173500  | -1.00474800 | -0.40729600 |
| C  | 7.33596100  | -0.84900600 | -0.80979600 | C  | 7.29632000  | -0.78404600 | -0.75232200 |

|    |              |             |             |   |              |             |             |
|----|--------------|-------------|-------------|---|--------------|-------------|-------------|
| C  | 8.31358000   | -0.51266600 | 0.34342100  | C | 8.22305500   | -0.50191800 | 0.45507700  |
| C  | 7.99237400   | -2.09983200 | -1.44553200 | C | 7.99570600   | -1.98992500 | -1.42534000 |
| H  | 7.37399200   | -0.03134700 | -1.54235000 | H | 7.35018800   | 0.07289800  | -1.43752500 |
| C  | 9.71190000   | -0.76404100 | -0.26090800 | C | 9.64611700   | -0.68915300 | -0.11340600 |
| H  | 8.12053600   | -1.19726700 | 1.17467000  | H | 8.01422300   | -1.24319000 | 1.23232500  |
| H  | 8.18016400   | 0.50381900  | 0.71839000  | H | 8.05354100   | 0.48548800  | 0.88826700  |
| C  | 9.50377300   | -1.78703100 | -1.41899000 | C | 9.49745100   | -1.64585900 | -1.33630400 |
| H  | 7.61025300   | -2.30633300 | -2.44703300 | H | 7.64693700   | -2.15773400 | -2.44591700 |
| H  | 7.76369700   | -2.96867000 | -0.82125900 | H | 7.76766500   | -2.89005100 | -0.84650600 |
| H  | 10.13139000  | 0.16757000  | -0.64945000 | H | 10.05637900  | 0.27232000  | -0.43276900 |
| H  | 10.41050900  | -1.13198300 | 0.49326700  | H | 10.32723400  | -1.08693900 | 0.64152700  |
| H  | 9.81826200   | -1.35053800 | -2.37055200 | H | 9.82491600   | -1.14413300 | -2.25061100 |
| H  | 10.09540400  | -2.69402600 | -1.27923500 | H | 10.10794300  | -2.54529700 | -1.23455900 |
| C  | -7.08618300  | -0.20297300 | 0.67167800  | C | -7.04136800  | -0.25223700 | 0.78126100  |
| C  | -6.81975700  | -0.47619300 | -1.74621500 | C | -6.95947700  | -0.14771700 | -1.66266500 |
| C  | -8.56558600  | -0.58446400 | 0.58712200  | C | -8.53081800  | -0.59889300 | 0.75100400  |
| H  | -6.98121800  | 0.89915200  | 0.62711300  | H | -6.91255400  | 0.84192800  | 0.89738500  |
| H  | -6.65434000  | -0.53798400 | 1.61641300  | H | -6.54771800  | -0.73831400 | 1.62466600  |
| C  | -8.29150600  | -0.86563700 | -1.89973900 | C | -8.44777900  | -0.48891600 | -1.76043900 |
| H  | -6.70147900  | 0.61120700  | -1.92444100 | H | -6.83032500  | 0.95343500  | -1.67621900 |
| H  | -6.20245300  | -0.99959300 | -2.47856200 | H | -6.40858000  | -0.55558200 | -2.51210200 |
| C  | -9.14645200  | -0.24158100 | -0.79007400 | C | -9.19934600  | -0.02795800 | -0.50551200 |
| H  | -9.11652900  | -0.07035900 | 1.38075800  | H | -9.01044000  | -0.21604900 | 1.65690600  |
| H  | -8.65759700  | -1.66023200 | 0.76894600  | H | -8.63261800  | -1.68898900 | 0.75952400  |
| H  | -8.64636800  | -0.55288600 | -2.88668400 | H | -8.86693900  | -0.02537900 | -2.65871400 |
| H  | -8.36843800  | -1.95692900 | -1.85504500 | H | -8.54838400  | -1.57354100 | -1.87146200 |
| H  | -10.18207200 | -0.58621600 | -0.86532000 | H | -10.24921500 | -0.33130100 | -0.55397400 |
| H  | -9.16688900  | 0.84873700  | -0.91563800 | H | -9.18676100  | 1.06863800  | -0.45711000 |
| N  | -6.33370100  | -0.84423900 | -0.41248200 | N | -6.38761500  | -0.72550700 | -0.44479400 |
| 39 |              |             |             |   |              |             |             |
| C  | 0.61725400   | 3.09174500  | 1.19010400  | C | 0.77910000   | 2.92020000  | 1.17830000  |
| C  | 0.16161000   | 1.77827000  | 1.25593100  | C | 0.26560000   | 1.62800000  | 1.22810000  |
| C  | -0.34679100  | 1.14396600  | 0.11706400  | C | -0.38060000  | 1.07890000  | 0.11510000  |
| C  | -0.42816400  | 1.86123300  | -1.07654100 | C | -0.54030000  | 1.85680000  | -1.03100000 |
| C  | 0.00757800   | 3.17677500  | -1.15515100 | C | -0.04950000  | 3.15340000  | -1.08990000 |
| C  | 0.53676600   | 3.77562900  | -0.01642100 | C | 0.61770000   | 3.66750000  | 0.01810000  |
| H  | 1.01387700   | 3.57249100  | 2.07298200  | H | 1.28530000   | 3.33580000  | 2.03780000  |

|    |             |             |             |    |             |             |             |
|----|-------------|-------------|-------------|----|-------------|-------------|-------------|
| H  | -0.84003000 | 1.36614100  | -1.94671200 | H  | -1.05450000 | 1.42090000  | -1.87770000 |
| H  | -0.05389100 | 3.72678700  | -2.08435900 | H  | -0.16970000 | 3.75340000  | -1.98150000 |
| N  | -0.82878300 | -0.19518000 | 0.14816100  | N  | -0.89780000 | -0.24370000 | 0.12100000  |
| C  | -0.12923400 | -1.37613100 | 0.32189500  | C  | -0.21890000 | -1.44250000 | 0.23790000  |
| C  | -1.07002700 | -2.39952400 | 0.27153500  | C  | -1.18220000 | -2.44390000 | 0.17650000  |
| C  | -2.30370300 | -1.73162500 | 0.06228900  | C  | -2.40530000 | -1.74600000 | 0.01650000  |
| C  | -3.65940000 | -2.35390200 | -0.07512100 | C  | -3.77710000 | -2.33430000 | -0.10560000 |
| O  | -3.82081000 | -3.55840800 | -0.02507200 | O  | -3.97370000 | -3.53290000 | -0.03980000 |
| N  | -4.65052600 | -1.42477700 | -0.25708900 | N  | -4.73340000 | -1.37460000 | -0.29600000 |
| C  | 1.31423300  | -1.46011000 | 0.48025100  | C  | 1.22200000  | -1.55720000 | 0.36220000  |
| C  | 2.00249300  | -2.27375200 | 1.35025600  | C  | 1.90630000  | -2.46410000 | 1.13830000  |
| S  | 2.43097200  | -0.57404500 | -0.53734000 | S  | 2.33860000  | -0.56040000 | -0.54730000 |
| C  | 3.40842800  | -2.18889500 | 1.22244500  | C  | 3.31210000  | -2.36490000 | 1.02460000  |
| H  | 1.50282000  | -2.89838300 | 2.07778000  | H  | 1.40140000  | -3.16200000 | 1.79120000  |
| C  | 3.81902600  | -1.30756300 | 0.24687000  | C  | 3.72340000  | -1.37870000 | 0.15530000  |
| H  | 4.10906600  | -2.74390300 | 1.83084600  | H  | 4.01310000  | -2.98270000 | 1.56860000  |
| Cl | 0.21081000  | 0.95825800  | 2.79573200  | Cl | 0.43220000  | 0.72140000  | 2.70960000  |
| Cl | 1.10664700  | 5.43242500  | -0.09502400 | Cl | 1.26410000  | 5.29720000  | -0.04060000 |
| H  | -4.37680300 | -0.44866100 | -0.25818600 | H  | -4.42510000 | -0.41000000 | -0.28460000 |
| N  | -2.14748800 | -0.41119800 | -0.01775700 | N  | -2.22400000 | -0.42590000 | -0.02390000 |
| C  | -0.82356200 | -3.87305100 | 0.36685200  | C  | -0.96380000 | -3.92300000 | 0.22170000  |
| H  | -1.02248700 | -4.24334400 | 1.37775500  | H  | -1.08030000 | -4.30690000 | 1.24040000  |
| H  | -1.49620900 | -4.41290000 | -0.29752900 | H  | -1.70620000 | -4.43210000 | -0.39010000 |
| H  | 0.21299700  | -4.10949700 | 0.11767000  | H  | 0.04220000  | -4.17510000 | -0.12160000 |
| C  | 5.12801100  | -0.96371000 | -0.14028000 | C  | 5.03220000  | -0.99180000 | -0.18490000 |
| C  | 6.24720800  | -0.66212300 | -0.48528700 | C  | 6.14930000  | -0.64560000 | -0.49020000 |
| C  | -6.87161300 | -1.28213100 | 0.66264300  | C  | -6.88250000 | -1.09860000 | 0.71940000  |
| C  | -6.60284900 | -1.35762200 | -1.66205800 | C  | -6.72060000 | -1.15780000 | -1.60420000 |
| H  | -6.32288300 | -1.21939900 | 1.60259700  | H  | -6.31180000 | -1.13970000 | 1.64730000  |
| H  | -7.68309700 | -2.00474000 | 0.79634100  | H  | -7.77700000 | -1.71640000 | 0.84410000  |
| C  | -7.25519300 | 0.02135900  | -1.39485500 | C  | -7.16390000 | 0.29230000  | -1.29170000 |
| H  | -7.36915000 | -2.09215900 | -1.93022400 | H  | -7.59220000 | -1.78350000 | -1.81980000 |
| H  | -5.85420700 | -1.35233600 | -2.45465000 | H  | -6.02750000 | -1.24370000 | -2.44110000 |
| H  | -8.22287200 | 0.08507400  | -1.89865600 | H  | -8.13170000 | 0.50350000  | -1.75270000 |
| C  | -7.43717500 | 0.07129000  | 0.16578300  | C  | -7.27270000 | 0.33220000  | 0.27570000  |
| C  | -6.68630300 | 1.34334800  | 0.63302600  | C  | -6.32510000 | 1.46960000  | 0.73180000  |
| C  | -6.65528800 | 2.25362500  | -0.60472400 | C  | -6.21290000 | 2.39350000  | -0.49080000 |

|    |             |             |             |   |             |             |             |
|----|-------------|-------------|-------------|---|-------------|-------------|-------------|
| H  | -5.66172600 | 1.09514200  | 0.93262700  | H | -5.33700000 | 1.07050000  | 0.98490000  |
| H  | -7.16047900 | 1.81067600  | 1.49958600  | H | -6.69130000 | 1.98120000  | 1.62510000  |
| C  | -6.40581500 | 1.26594200  | -1.75530700 | C | -6.15860000 | 1.40860000  | -1.66910000 |
| H  | -7.62815600 | 2.74122600  | -0.73507800 | H | -7.10980000 | 3.01840000  | -0.56940000 |
| H  | -5.90082400 | 3.04221800  | -0.54130000 | H | -5.34930000 | 3.06230000  | -0.44730000 |
| H  | -6.66187200 | 1.67331600  | -2.73657300 | H | -6.39550000 | 1.87270000  | -2.62950000 |
| H  | -5.34170700 | 1.00554700  | -1.79150200 | H | -5.14680000 | 0.99890000  | -1.76150000 |
| H  | -8.49448000 | 0.15747300  | 0.42829700  | H | -8.29420000 | 0.56320000  | 0.58690000  |
| C  | 7.60167700  | -0.31221000 | -0.88551900 | C | 7.50490000  | -0.25040000 | -0.83510000 |
| C  | 8.48915200  | 0.25436000  | 0.25049800  | C | 8.34990000  | 0.26790000  | 0.35380000  |
| C  | 8.45093400  | -1.49727700 | -1.40863800 | C | 8.38930000  | -1.39330000 | -1.39000000 |
| H  | 7.53816100  | 0.44254400  | -1.68108300 | H | 7.45030000  | 0.54350000  | -1.59230000 |
| C  | 9.92411700  | 0.16803300  | -0.31246000 | C | 9.79710000  | 0.24990000  | -0.18200000 |
| H  | 8.37778200  | -0.38493900 | 1.13128900  | H | 8.23580000  | -0.42880000 | 1.18970000  |
| H  | 8.19778700  | 1.26558400  | 0.54066400  | H | 8.02520000  | 1.25140000  | 0.69840000  |
| C  | 9.89900100  | -0.96280600 | -1.38560500 | C | 9.82390000  | -0.82920000 | -1.30790000 |
| H  | 8.12957100  | -1.83548800 | -2.39554000 | H | 8.09680000  | -1.69470000 | -2.39740000 |
| H  | 8.33613200  | -2.33920600 | -0.71953100 | H | 8.27660000  | -2.26560000 | -0.73910000 |
| H  | 10.21074600 | 1.11827200  | -0.77043000 | H | 10.06140000 | 1.22890000  | -0.59030000 |
| H  | 10.65023300 | -0.03053000 | 0.47845500  | H | 10.51440000 | 0.03610000  | 0.61290000  |
| H  | 10.17156600 | -0.56126400 | -2.36506800 | H | 10.10740000 | -0.37480000 | -2.26080000 |
| H  | 10.61308700 | -1.75825300 | -1.16300100 | H | 10.55130000 | -1.61820000 | -1.10660000 |
| N  | -5.98648700 | -1.80826700 | -0.39736400 | N | -6.09310000 | -1.69540000 | -0.37950000 |
| 40 |             |             |             |   |             |             |             |
| C  | 0.39147800  | 3.48388900  | 0.95586400  | C | 0.61270000  | 3.29010000  | 1.00830000  |
| C  | -0.18073700 | 2.22537800  | 1.11663100  | C | -0.03330000 | 2.06320000  | 1.12330000  |
| C  | -0.71943900 | 1.54393300  | 0.01973900  | C | -0.69670000 | 1.50580000  | 0.02460000  |
| C  | -0.71200700 | 2.16238500  | -1.23052300 | C | -0.73790000 | 2.21360000  | -1.17590000 |
| C  | -0.15923400 | 3.42360000  | -1.40465900 | C | -0.11330000 | 3.44640000  | -1.30130000 |
| C  | 0.39762900  | 4.06789000  | -0.30458500 | C | 0.56760000  | 3.96650000  | -0.20460000 |
| H  | 0.81057600  | 4.00117100  | 1.80714100  | H | 1.13120000  | 3.71150000  | 1.85750000  |
| H  | -1.14917500 | 1.63373500  | -2.06798000 | H | -1.26750000 | 1.77390000  | -2.01110000 |
| H  | -0.15255700 | 3.89671400  | -2.37719100 | H | -0.14180000 | 3.99160000  | -2.23480000 |
| N  | -1.31934700 | 0.25900600  | 0.14647600  | N | -1.34300000 | 0.24310000  | 0.09680000  |
| C  | -0.73199200 | -0.95882400 | 0.44091900  | C | -0.78530000 | -1.00370000 | 0.31370000  |
| C  | -1.75835800 | -1.89750800 | 0.44383300  | C | -1.83710000 | -1.91210000 | 0.28040000  |
| C  | -2.92154100 | -1.14538500 | 0.13754700  | C | -2.98250000 | -1.11370000 | 0.03150000  |

|    |              |             |             |    |              |             |             |
|----|--------------|-------------|-------------|----|--------------|-------------|-------------|
| C  | -4.32142400  | -1.65822700 | 0.00584200  | C  | -4.39430000  | -1.58590000 | -0.10100000 |
| O  | -4.59377700  | -2.83303800 | 0.17072300  | O  | -4.70020000  | -2.75230000 | 0.06710000  |
| N  | -5.22216500  | -0.67708300 | -0.31499800 | N  | -5.26870000  | -0.58310000 | -0.42910000 |
| C  | 0.69395600   | -1.15367800 | 0.65205200  | C  | 0.63390000   | -1.24350000 | 0.49790000  |
| C  | 1.28593600   | -1.94648000 | 1.60786300  | C  | 1.20500000   | -2.15070000 | 1.36020000  |
| S  | 1.90929700   | -0.45820500 | -0.40001200 | S  | 1.86700000   | -0.42690000 | -0.44030000 |
| C  | 2.69656600   | -1.99559000 | 1.51726300  | C  | 2.61660000   | -2.19370000 | 1.28920000  |
| H  | 0.71541200   | -2.46068700 | 2.36894200  | H  | 0.61660000   | -2.74720000 | 2.04300000  |
| C  | 3.20719800   | -1.24006300 | 0.48518300  | C  | 3.14560000   | -1.31790000 | 0.36700000  |
| H  | 3.33019700   | -2.55551100 | 2.19112600  | H  | 3.23890000   | -2.83270000 | 1.90000000  |
| Cl | -0.23772500  | 1.53769500  | 2.71969900  | Cl | -0.00860000  | 1.24970000  | 2.66680000  |
| Cl | 1.11466200   | 5.65610300  | -0.50295700 | Cl | 1.38200000   | 5.51370000  | -0.34610000 |
| H  | -4.88241800  | 0.27851300  | -0.39246100 | H  | -4.92270000  | 0.37390000  | -0.41830000 |
| N  | -2.64650600  | 0.14464200  | -0.04638100 | N  | -2.67500000  | 0.17780000  | -0.08540000 |
| C  | -1.64620200  | -3.37324200 | 0.66889800  | C  | -1.76080000  | -3.39890000 | 0.42530000  |
| H  | -1.90541000  | -3.63767700 | 1.69914900  | H  | -1.96110000  | -3.70440000 | 1.45730000  |
| H  | -2.34484300  | -3.90849500 | 0.02796500  | H  | -2.51750000  | -3.87810000 | -0.19310000 |
| H  | -0.62806000  | -3.71804600 | 0.47674600  | H  | -0.76780000  | -3.76220000 | 0.15090000  |
| C  | 4.55061300   | -1.04621800 | 0.11074300  | C  | 4.49510000   | -1.08290000 | 0.04580000  |
| C  | 5.69875700   | -0.87034500 | -0.22580700 | C  | 5.64740000   | -0.86360000 | -0.24530000 |
| C  | -7.36951400  | -0.28896300 | 0.59494200  | C  | -7.32420000  | -0.32640000 | 0.71420000  |
| C  | -7.04866400  | -0.61538100 | -1.80965000 | C  | -7.20360000  | -0.26920000 | -1.72960000 |
| C  | -8.83881500  | -0.70320000 | 0.49068900  | C  | -8.80620000  | -0.70200000 | 0.66680000  |
| H  | -7.28611200  | 0.81369500  | 0.52516100  | H  | -7.21780000  | 0.77210000  | 0.81010000  |
| H  | -6.95017600  | -0.59175100 | 1.55604200  | H  | -6.83570000  | -0.78610000 | 1.57520000  |
| C  | -8.50876700  | -1.03905900 | -1.98260700 | C  | -8.68340000  | -0.64060000 | -1.84470000 |
| H  | -6.94895900  | 0.46960100  | -2.01234500 | H  | -7.09480000  | 0.83370000  | -1.76330000 |
| H  | -6.40612200  | -1.14341800 | -2.51651500 | H  | -6.63110000  | -0.68340000 | -2.56150000 |
| C  | -9.39860100  | -0.40627400 | -0.90578700 | C  | -9.46440000  | -0.16920000 | -0.61180000 |
| H  | -9.41608600  | -0.18147100 | 1.26027000  | H  | -9.30800000  | -0.31030000 | 1.55680000  |
| H  | -8.91253800  | -1.77588700 | 0.69734700  | H  | -8.88770000  | -1.79340000 | 0.69580000  |
| H  | -8.84983900  | -0.75776400 | -2.98377900 | H  | -9.09610000  | -0.20300000 | -2.75890000 |
| H  | -8.56432500  | -2.13031800 | -1.91261100 | H  | -8.76180000  | -1.72890000 | -1.93550000 |
| H  | -10.42519200 | -0.77433500 | -0.99287300 | H  | -10.50740000 | -0.49360000 | -0.67120000 |
| H  | -9.43887700  | 0.67998500  | -1.05872500 | H  | -9.47340000  | 0.92820000  | -0.58540000 |
| N  | -6.58234000  | -0.94067000 | -0.45790100 | N  | -6.64150000  | -0.81170000 | -0.49120000 |
| C  | 7.09258600   | -0.68345900 | -0.61847300 | C  | 7.04900000   | -0.63440000 | -0.57750000 |



|    |             |             |             |   |             |             |             |
|----|-------------|-------------|-------------|---|-------------|-------------|-------------|
| C  | 8.02345300  | -0.57195700 | 0.61449300  | C | 7.93270000  | -0.58140000 | 0.69310000  |
| C  | 7.57736100  | -1.80743300 | -1.56854500 | C | 7.58410000  | -1.69900000 | -1.56720000 |
| H  | 7.15587200  | 0.26638700  | -1.16884000 | H | 7.11860000  | 0.34490000  | -1.07250000 |
| C  | 9.48690200  | -0.37587700 | 0.19652700  | C | 9.40480000  | -0.33640000 | 0.33740000  |
| H  | 7.92544300  | -1.48832500 | 1.20817100  | H | 7.83260000  | -1.53530000 | 1.22400000  |
| H  | 7.68966500  | 0.25292800  | 1.24983900  | H | 7.56090000  | 0.19690000  | 1.36490000  |
| C  | 9.04276300  | -1.60442100 | -1.97603100 | C | 9.05790000  | -1.44750000 | -1.91170000 |
| H  | 7.46294100  | -2.76924000 | -1.05534600 | H | 7.47350000  | -2.68700000 | -1.10550000 |
| H  | 6.93246600  | -1.84226800 | -2.45082800 | H | 6.96880000  | -1.70010000 | -2.47090000 |
| C  | 9.96203700  | -1.48441100 | -0.75282700 | C | 9.92970000  | -1.38770000 | -0.65000000 |
| H  | 10.12206700 | -0.33964300 | 1.08713000  | H | 10.00970000 | -0.33330000 | 1.24940000  |
| H  | 9.59369100  | 0.59704400  | -0.30046500 | H | 9.50660000  | 0.66120000  | -0.10920000 |
| H  | 9.36526000  | -2.43285200 | -2.61446300 | H | 9.41790000  | -2.22880000 | -2.58800000 |
| H  | 9.12685200  | -0.69382000 | -2.58332000 | H | 9.14430000  | -0.49810000 | -2.45590000 |
| H  | 10.99198000 | -1.29425700 | -1.07068700 | H | 10.96910000 | -1.17260000 | -0.91650000 |
| H  | 9.97267600  | -2.44075200 | -0.21439500 | H | 9.92610000  | -2.37150000 | -0.16350000 |
| 41 |             |             |             |   |             |             |             |
| C  | 0.27674100  | 3.14651800  | 1.22093000  | C | 0.43890000  | 2.96880000  | 1.23980000  |
| C  | -0.16252900 | 1.82795100  | 1.29564500  | C | -0.05850000 | 1.67020000  | 1.28690000  |
| C  | -0.63625100 | 1.17046900  | 0.15495000  | C | -0.66660000 | 1.10290000  | 0.16160000  |
| C  | -0.70000700 | 1.86938400  | -1.05054600 | C | -0.80520000 | 1.86890000  | -0.99520000 |
| C  | -0.28035300 | 3.18955800  | -1.13849800 | C | -0.33030000 | 3.17150000  | -1.05210000 |
| C  | 0.21457000  | 3.81190000  | 0.00303700  | C | 0.29940000  | 3.70400000  | 0.06910000  |
| H  | 0.64659600  | 3.64529100  | 2.10542700  | H | 0.91590000  | 3.39850000  | 2.10900000  |
| H  | -1.08518200 | 1.35624000  | -1.92248100 | H | -1.29020000 | 1.41880000  | -1.85170000 |
| H  | -0.32798800 | 3.72530600  | -2.07680700 | H | -0.43410000 | 3.76220000  | -1.95200000 |
| N  | -1.10085800 | -0.17458100 | 0.19471500  | N | -1.16610000 | -0.22640000 | 0.16530000  |
| C  | -0.38975600 | -1.34320500 | 0.40177800  | C | -0.47480000 | -1.41490000 | 0.31090000  |
| C  | -1.31543300 | -2.37999000 | 0.34511300  | C | -1.42260000 | -2.42980000 | 0.23210000  |
| C  | -2.55276800 | -1.73212900 | 0.09793800  | C | -2.65010000 | -1.74980000 | 0.03310000  |
| C  | -3.89643200 | -2.37493100 | -0.06120600 | C | -4.01010000 | -2.35770000 | -0.12100000 |
| O  | -4.04296000 | -3.58060200 | 0.00434400  | O | -4.19210000 | -3.55840000 | -0.05220000 |
| N  | -4.89532600 | -1.46254400 | -0.28143100 | N | -4.97410000 | -1.41240000 | -0.34290000 |
| C  | 1.05074800  | -1.40528000 | 0.59376400  | C | 0.96360000  | -1.50900000 | 0.47540000  |
| C  | 1.72994300  | -2.19804300 | 1.48976900  | C | 1.63830000  | -2.40080000 | 1.27690000  |
| S  | 2.17841500  | -0.51787800 | -0.41054500 | S | 2.09140000  | -0.50430000 | -0.41120000 |
| C  | 3.13723100  | -2.09637000 | 1.39177500  | C | 3.04540000  | -2.28380000 | 1.20060000  |

|    |             |             |             |    |             |             |             |
|----|-------------|-------------|-------------|----|-------------|-------------|-------------|
| H  | 1.22243100  | -2.81966400 | 2.21443700  | H  | 1.12500000  | -3.10040000 | 1.92140000  |
| C  | 3.55796900  | -1.22274400 | 0.41377800  | C  | 3.46710000  | -1.29870000 | 0.33530000  |
| H  | 3.83128600  | -2.63413900 | 2.02279100  | H  | 3.73930000  | -2.88800000 | 1.76820000  |
| Cl | -0.13728100 | 1.03077200  | 2.84794200  | Cl | 0.07970000  | 0.77850000  | 2.78040000  |
| Cl | 0.76364200  | 5.47512900  | -0.08684200 | Cl | 0.92540000  | 5.34170000  | 0.01350000  |
| H  | -4.63463500 | -0.48291900 | -0.29287900 | H  | -4.67930000 | -0.44370000 | -0.33070000 |
| N  | -2.41238900 | -0.41098100 | 0.00193200  | N  | -2.48540000 | -0.42780000 | -0.01390000 |
| C  | -1.05156000 | -3.84848700 | 0.46756200  | C  | -1.18590000 | -3.90540000 | 0.29600000  |
| H  | -1.26716400 | -4.20668300 | 1.47940500  | H  | -1.32550000 | -4.28240000 | 1.31440000  |
| H  | -1.70257600 | -4.40702300 | -0.20287400 | H  | -1.90420000 | -4.42940000 | -0.33180000 |
| H  | -0.00686200 | -4.07443500 | 0.24396400  | H  | -0.16750000 | -4.14660000 | -0.01720000 |
| C  | 4.87099800  | -0.86722300 | 0.05036900  | C  | 4.77980000  | -0.89700000 | 0.02760000  |
| C  | 5.99233000  | -0.55246700 | -0.27516400 | C  | 5.89910000  | -0.53410000 | -0.24880000 |
| C  | -7.14032400 | -1.33236200 | 0.58032000  | C  | -7.15420000 | -1.15970000 | 0.61030000  |
| C  | -6.81310800 | -1.45012500 | -1.73522800 | C  | -6.92680000 | -1.23270000 | -1.70740000 |
| H  | -6.61585600 | -1.24314600 | 1.53191800  | H  | -6.60910000 | -1.18620000 | 1.55400000  |
| H  | -7.94490200 | -2.06358600 | 0.70882700  | H  | -8.04310000 | -1.78940000 | 0.71480000  |
| C  | -7.49120200 | -0.07578300 | -1.51194300 | C  | -7.39910000 | 0.21300000  | -1.41790000 |
| H  | -7.56201500 | -2.20091200 | -2.00748800 | H  | -7.78310000 | -1.87210000 | -1.94270000 |
| H  | -6.04505200 | -1.44955500 | -2.50904100 | H  | -6.20930000 | -1.31430000 | -2.52400000 |
| H  | -8.44712200 | -0.03627100 | -2.04008100 | H  | -8.35640000 | 0.40720000  | -1.90720000 |
| C  | -7.71190800 | 0.00271700  | 0.04254700  | C  | -7.55230000 | 0.26210000  | 0.14550000  |
| C  | -6.99006100 | 1.29431200  | 0.50177100  | C  | -6.63410000 | 1.41630000  | 0.61960000  |
| C  | -6.94179600 | 2.18020800  | -0.75297800 | C  | -6.50080000 | 2.33320000  | -0.60620000 |
| H  | -5.96965400 | 1.06665000  | 0.83045900  | H  | -5.64780000 | 1.03310000  | 0.90310000  |
| H  | -7.49123900 | 1.77189900  | 1.34728600  | H  | -7.03240000 | 1.92860000  | 1.49850000  |
| C  | -6.65081800 | 1.17352000  | -1.87704400 | C  | -6.39960000 | 1.34110000  | -1.77520000 |
| H  | -7.91788300 | 2.65111900  | -0.91637800 | H  | -7.40400000 | 2.94450000  | -0.71420000 |
| H  | -6.20008600 | 2.98064800  | -0.68746200 | H  | -5.64840000 | 3.01460000  | -0.54350000 |
| H  | -6.88862700 | 1.55757600  | -2.87220800 | H  | -6.61610000 | 1.79520000  | -2.74520000 |
| H  | -5.58264100 | 0.92774200  | -1.88237400 | H  | -5.37980000 | 0.94540000  | -1.83640000 |
| H  | -8.77639900 | 0.07931600  | 0.27757600  | H  | -8.58520000 | 0.48050000  | 0.42650000  |
| N  | -6.22220100 | -1.86679200 | -0.44693200 | N  | -6.32630000 | -1.75280000 | -0.46180000 |
| C  | 7.35670900  | -0.19782400 | -0.65541100 | C  | 7.26420000  | -0.13260000 | -0.56890000 |
| C  | 8.28420400  | -0.09087100 | 0.58050300  | C  | 8.19160000  | -0.24250000 | 0.66630000  |
| C  | 7.94080100  | -1.19050600 | -1.69191600 | C  | 7.83870000  | -0.94880000 | -1.75350000 |
| H  | 7.32005300  | 0.79360100  | -1.12962700 | H  | 7.23940000  | 0.92350000  | -0.87360000 |

|    |             |             |             |   |             |             |             |
|----|-------------|-------------|-------------|---|-------------|-------------|-------------|
| C  | 9.71692600  | 0.28161300  | 0.17633300  | C | 9.62520000  | 0.18470000  | 0.32550000  |
| H  | 8.28311500  | -1.05599000 | 1.10043300  | H | 8.18630000  | -1.28300000 | 1.01140000  |
| H  | 7.87677000  | 0.64463200  | 1.27946900  | H | 7.78900000  | 0.36500000  | 1.48120000  |
| C  | 9.37483400  | -0.81160500 | -2.08518600 | C | 9.27370000  | -0.51680000 | -2.08230000 |
| H  | 7.92717500  | -2.19604600 | -1.25574800 | H | 7.82270000  | -2.01060000 | -1.48190000 |
| H  | 7.29382400  | -1.22029900 | -2.57286300 | H | 7.18930000  | -0.83420000 | -2.62550000 |
| C  | 10.28989000 | -0.69666300 | -0.85833800 | C | 10.18880000 | -0.61900000 | -0.85440000 |
| H  | 10.35411700 | 0.31097900  | 1.06574500  | H | 10.26430000 | 0.06910000  | 1.20620000  |
| H  | 9.72218900  | 1.29619800  | -0.24268300 | H | 9.63240000  | 1.25260000  | 0.07150000  |
| H  | 9.77138400  | -1.55143000 | -2.78754600 | H | 9.66480000  | -1.12750000 | -2.90190000 |
| H  | 9.36238300  | 0.14750700  | -2.61905400 | H | 9.26510000  | 0.52050000  | -2.44130000 |
| H  | 11.29269900 | -0.38073700 | -1.16255800 | H | 11.19700000 | -0.27290000 | -1.10220000 |
| H  | 10.40066800 | -1.68628900 | -0.39683100 | H | 10.28040000 | -1.67260000 | -0.56090000 |
| 42 |             |             |             |   |             |             |             |
| C  | -0.05582800 | 3.86671600  | 0.66823600  | C | 0.40870000  | 3.61780000  | 0.74260000  |
| C  | -0.50924200 | 2.58366900  | 0.96030200  | C | -0.21520000 | 2.40740000  | 1.02760000  |
| C  | -0.91207000 | 1.72139000  | -0.06536100 | C | -0.71160000 | 1.60530000  | -0.00590000 |
| C  | -0.89204600 | 2.18112000  | -1.38219000 | C | -0.61000000 | 2.05200000  | -1.32260000 |
| C  | -0.45739500 | 3.46318200  | -1.68865200 | C | -0.00570000 | 3.26480000  | -1.62170000 |
| C  | -0.03293200 | 4.29117500  | -0.65436300 | C | 0.50880000  | 4.03140000  | -0.58020000 |
| H  | 0.25873600  | 4.52468600  | 1.46575100  | H | 0.79810000  | 4.22900000  | 1.54400000  |
| H  | -1.22482000 | 1.51201400  | -2.16544600 | H | -1.01180000 | 1.42520000  | -2.10820000 |
| H  | -0.44019800 | 3.81309000  | -2.71186700 | H | 0.07720000  | 3.60730000  | -2.64410000 |
| N  | -1.38846400 | 0.40508500  | 0.19480600  | N | -1.32950000 | 0.35120000  | 0.24580000  |
| C  | -0.70324600 | -0.69896200 | 0.67050400  | C | -0.77370000 | -0.79490000 | 0.78400000  |
| C  | -1.62973200 | -1.73374900 | 0.74272100  | C | -1.78870000 | -1.74430000 | 0.81310000  |
| C  | -2.84041700 | -1.15166000 | 0.28659100  | C | -2.91210000 | -1.07310000 | 0.26630000  |
| C  | -4.17195100 | -1.82227900 | 0.15355400  | C | -4.28250000 | -1.63470000 | 0.06510000  |
| O  | -4.33504000 | -2.99091200 | 0.45220400  | O | -4.57670000 | -2.75720000 | 0.43370000  |
| N  | -5.14466500 | -0.98833300 | -0.33098900 | N | -5.13300000 | -0.76610000 | -0.56680000 |
| C  | 0.71918100  | -0.71509000 | 0.97480400  | C | 0.61550000  | -0.91890000 | 1.18490000  |
| C  | 1.32524200  | -1.31852300 | 2.05271700  | C | 1.09300000  | -1.60290000 | 2.27940000  |
| S  | 1.92215200  | -0.02685300 | -0.09489500 | S | 1.93700000  | -0.24580000 | 0.25470000  |
| C  | 2.73628800  | -1.22650400 | 2.04061600  | C | 2.50240000  | -1.58770000 | 2.38950000  |
| H  | 0.76162700  | -1.79411600 | 2.84337200  | H | 0.43670000  | -2.07850000 | 2.99440000  |
| C  | 3.23225500  | -0.55094200 | 0.94774600  | C | 3.12240000  | -0.88970000 | 1.37680000  |
| H  | 3.37926300  | -1.62898400 | 2.81112600  | H | 3.05700000  | -2.05870000 | 3.18910000  |

|    |              |             |             |    |              |             |             |
|----|--------------|-------------|-------------|----|--------------|-------------|-------------|
| Cl | -0.59283600  | 2.09327800  | 2.63322200  | Cl | -0.37540000  | 1.92460000  | 2.69690000  |
| Cl | 0.53383800   | 5.91016200  | -1.01865200 | Cl | 1.29480000   | 5.55830000  | -0.93630000 |
| H  | -4.89749600  | -0.01878600 | -0.51395700 | H  | -4.81630000  | 0.18990000  | -0.71350000 |
| N  | -2.68321800  | 0.12820800  | -0.04612700 | N  | -2.62460000  | 0.18180000  | -0.07830000 |
| C  | -1.38693000  | -3.15091700 | 1.15943800  | C  | -1.69510000  | -3.16460000 | 1.27280000  |
| H  | -1.68417700  | -3.31395500 | 2.20036800  | H  | -2.02510000  | -3.26400000 | 2.31180000  |
| H  | -1.98721900  | -3.83095700 | 0.55731200  | H  | -2.34970000  | -3.79820000 | 0.67720000  |
| H  | -0.32969700  | -3.40721900 | 1.06483000  | H  | -0.66570000  | -3.52400000 | 1.20770000  |
| C  | 4.57130200   | -0.26160100 | 0.62207600  | C  | 4.49570000   | -0.65940000 | 1.17520000  |
| C  | 5.71847600   | -0.01239500 | 0.33641400  | C  | 5.66910000   | -0.45080000 | 0.98110000  |
| C  | -7.37264300  | -0.72141200 | 0.41308900  | C  | -7.32510000  | -0.39230000 | 0.24130000  |
| C  | -6.87063200  | -1.30626600 | -1.91018900 | C  | -6.89090000  | -0.82140000 | -2.12880000 |
| C  | -8.78425200  | -1.29901600 | 0.29031400  | C  | -8.77820000  | -0.84620000 | 0.09300000  |
| H  | -7.39466200  | 0.36673100  | 0.20539100  | H  | -7.26060000  | 0.70710000  | 0.12100000  |
| H  | -6.98655500  | -0.85681700 | 1.42494600  | H  | -6.94030000  | -0.64340000 | 1.23130000  |
| C  | -8.26789100  | -1.90056500 | -2.09941200 | C  | -8.33320000  | -1.28460000 | -2.34360000 |
| H  | -6.86619100  | -0.25018200 | -2.24607100 | H  | -6.80750000  | 0.25640000  | -2.37550000 |
| H  | -6.13587400  | -1.84636800 | -2.51000500 | H  | -6.20500000  | -1.36400000 | -2.78190000 |
| C  | -9.28183200  | -1.23776400 | -1.15895000 | C  | -9.27920000  | -0.61640000 | -1.33810000 |
| H  | -9.45748200  | -0.75051000 | 0.95633400  | H  | -9.40080000  | -0.31020000 | 0.81560000  |
| H  | -8.76427000  | -2.33969200 | 0.62999900  | H  | -8.83420000  | -1.91220000 | 0.33620000  |
| H  | -8.57151900  | -1.78265200 | -3.14424600 | H  | -8.63550000  | -1.06170000 | -3.37140000 |
| H  | -8.21949700  | -2.97455200 | -1.89196800 | H  | -8.37080000  | -2.37160000 | -2.21730000 |
| H  | -10.25946400 | -1.72055000 | -1.24875600 | H  | -10.29680000 | -1.00020000 | -1.45540000 |
| H  | -9.41963600  | -0.18910700 | -1.45271400 | H  | -9.32050000  | 0.46180000  | -1.53980000 |
| N  | -6.46026700  | -1.41091100 | -0.50615700 | N  | -6.47980000  | -1.07390000 | -0.74640000 |
| C  | 7.10117000   | 0.30248700  | -0.00109000 | C  | 7.08660000   | -0.22030000 | 0.74100000  |
| H  | 7.58829600   | 0.74335900  | 0.87649500  | H  | 7.64150000   | -0.48010000 | 1.65150000  |
| H  | 7.09850100   | 1.09154700  | -0.76474100 | H  | 7.25080000   | 0.85360000  | 0.59010000  |
| C  | 7.94896600   | -0.86472200 | -0.50184600 | C  | 7.69070000   | -0.98170000 | -0.43690000 |
| C  | 9.34189000   | -0.74256900 | -0.48714300 | C  | 8.98630000   | -0.65550000 | -0.85040000 |
| C  | 7.38139100   | -2.03592500 | -1.00361000 | C  | 7.00720000   | -1.99990000 | -1.10020000 |
| C  | 10.15094700  | -1.76747600 | -0.96848000 | C  | 9.58820000   | -1.33550000 | -1.90440000 |
| H  | 9.79735400   | 0.16143300  | -0.09412900 | H  | 9.52700000   | 0.13800000  | -0.34310000 |
| C  | 8.19047200   | -3.06415700 | -1.48538700 | C  | 7.60890000   | -2.68200000 | -2.15780000 |
| H  | 6.30321500   | -2.14590800 | -1.01024800 | H  | 6.00090000   | -2.25690000 | -0.79100000 |
| C  | 9.57627600   | -2.93399900 | -1.47061800 | C  | 8.89930000   | -2.35370000 | -2.56310000 |

|    |             |             |             |    |             |             |             |
|----|-------------|-------------|-------------|----|-------------|-------------|-------------|
| H  | 11.22951200 | -1.65742600 | -0.94716900 | H  | 10.59280000 | -1.06950000 | -2.21380000 |
| H  | 7.73391500  | -3.96933500 | -1.87022400 | H  | 7.06420000  | -3.47060000 | -2.66500000 |
| H  | 10.20458100 | -3.73509700 | -1.84308400 | H  | 9.36530000  | -2.88360000 | -3.38600000 |
| 43 |             |             |             |    |             |             |             |
| C  | 1.57788000  | 3.40663100  | 0.89583200  | C  | 1.77692900  | 3.22013200  | 0.93846900  |
| C  | 0.85515500  | 2.23006900  | 1.06966800  | C  | 0.98345200  | 2.08735800  | 1.08924100  |
| C  | 0.24739800  | 1.60159800  | -0.02266500 | C  | 0.26507900  | 1.57604600  | 0.00296300  |
| C  | 0.34116800  | 2.19316800  | -1.28230200 | C  | 0.32121800  | 2.23777800  | -1.22275500 |
| C  | 1.04553500  | 3.37441000  | -1.46959300 | C  | 1.09479300  | 3.37836000  | -1.38448900 |
| C  | 1.66688500  | 3.96435300  | -0.37350500 | C  | 1.82583300  | 3.85120300  | -0.29858900 |
| H  | 2.04870500  | 3.88348500  | 1.74367300  | H  | 2.33629700  | 3.60604900  | 1.77857400  |
| H  | -0.15041600 | 1.70871400  | -2.11631200 | H  | -0.25234900 | 1.83656800  | -2.04831500 |
| H  | 1.11829200  | 3.82709000  | -2.44910500 | H  | 1.14131400  | 3.88778000  | -2.33724700 |
| N  | -0.50698600 | 0.40165500  | 0.11791400  | N  | -0.53361000 | 0.40598200  | 0.11349100  |
| C  | -0.07619500 | -0.87352000 | 0.43885200  | C  | -0.13534900 | -0.89134700 | 0.37916600  |
| C  | -1.20977900 | -1.67959600 | 0.44712200  | C  | -1.29068300 | -1.66456600 | 0.36680500  |
| C  | -2.26850900 | -0.79527100 | 0.11650400  | C  | -2.32688200 | -0.73961000 | 0.08030000  |
| C  | -3.71909200 | -1.12756700 | -0.02446500 | C  | -3.78431500 | -1.03227400 | -0.05590600 |
| O  | -4.14260400 | -2.26337400 | 0.14299100  | O  | -4.23357600 | -2.16258900 | 0.08231900  |
| N  | -4.49769700 | -0.05640000 | -0.35370500 | N  | -4.54401600 | 0.06275600  | -0.34628000 |
| C  | 1.31316900  | -1.23866500 | 0.66788900  | C  | 1.24250200  | -1.29815500 | 0.58464000  |
| C  | 1.79194400  | -2.08677700 | 1.64093900  | C  | 1.69029900  | -2.24122900 | 1.48218000  |
| S  | 2.61320500  | -0.71032000 | -0.37661300 | S  | 2.56996800  | -0.67332400 | -0.36795000 |
| C  | 3.18592200  | -2.30816200 | 1.56854000  | C  | 3.08483000  | -2.46185900 | 1.42522800  |
| H  | 1.15413500  | -2.51748600 | 2.40023000  | H  | 1.02818700  | -2.73686100 | 2.17789100  |
| C  | 3.79512900  | -1.63239900 | 0.53423000  | C  | 3.72247900  | -1.68914400 | 0.47948900  |
| H  | 3.73986000  | -2.93326200 | 2.25516900  | H  | 3.62003500  | -3.15380900 | 2.06041000  |
| Cl | 0.70016900  | 1.58080000  | 2.68232800  | Cl | 0.89545300  | 1.33375700  | 2.66079200  |
| Cl | 2.57388600  | 5.44940600  | -0.58830500 | Cl | 2.82613200  | 5.27945800  | -0.48524200 |
| H  | -4.05462100 | 0.84524800  | -0.45936300 | H  | -4.09165200 | 0.96190400  | -0.42692700 |
| N  | -1.83555500 | 0.44792900  | -0.08547100 | N  | -1.86144000 | 0.49914900  | -0.07814900 |
| C  | -6.28666500 | -0.91135900 | -1.70023100 | C  | -6.35550300 | -0.74347900 | -1.68299700 |
| C  | -6.62520100 | -0.42744800 | 0.68744200  | C  | -6.65025100 | -0.32358700 | 0.72067600  |
| C  | -7.77478900 | -0.69642800 | -1.98567900 | C  | -7.84892300 | -0.52641900 | -1.93413600 |
| H  | -6.08281000 | -1.97638400 | -1.52031600 | H  | -6.14608700 | -1.81104000 | -1.52772900 |
| H  | -5.68245900 | -0.59180800 | -2.55271300 | H  | -5.76602900 | -0.40359000 | -2.53780300 |
| C  | -8.12147300 | -0.20047400 | 0.46007300  | C  | -8.15066500 | -0.09631800 | 0.52692300  |

|    |             |             |             |   |             |             |             |
|----|-------------|-------------|-------------|---|-------------|-------------|-------------|
| H  | -6.43874100 | -1.46776100 | 0.98939800  | H | -6.45414200 | -1.37210500 | 0.98480100  |
| H  | -6.25424400 | 0.22569500  | 1.48088900  | H | -6.26438500 | 0.30645500  | 1.52551600  |
| C  | -8.62323200 | -1.00537000 | -0.74556300 | C | -8.66842800 | -0.87938700 | -0.68631300 |
| H  | -8.07423600 | -1.32951400 | -2.82697000 | H | -8.16224500 | -1.13366500 | -2.78909900 |
| H  | -7.93222700 | 0.34499100  | -2.28803600 | H | -8.01652700 | 0.52404200  | -2.19724500 |
| H  | -8.66877800 | -0.47902700 | 1.36619500  | H | -8.68048800 | -0.39496200 | 1.43683100  |
| H  | -8.29705500 | 0.86729100  | 0.28751400  | H | -8.33189400 | 0.97388200  | 0.37664600  |
| H  | -9.67820800 | -0.78834400 | -0.93917900 | H | -9.73016400 | -0.67365200 | -0.85248300 |
| H  | -8.55624300 | -2.07679200 | -0.51879200 | H | -8.57793100 | -1.95458600 | -0.48730500 |
| N  | -5.88597100 | -0.09044400 | -0.54310400 | N | -5.93514500 | 0.05134700  | -0.51393500 |
| C  | -1.28232900 | -3.15356600 | 0.69862100  | C | -1.39963400 | -3.14337000 | 0.56434900  |
| H  | -2.04407000 | -3.60834200 | 0.06759900  | H | -2.20705000 | -3.54644400 | -0.04396400 |
| H  | -0.31640900 | -3.62715400 | 0.51166800  | H | -0.45860900 | -3.63669600 | 0.31123000  |
| C  | 5.15620300  | -1.60827500 | 0.17883100  | C | 5.09185800  | -1.63665200 | 0.16503100  |
| C  | 6.32133300  | -1.58291800 | -0.13715900 | C | 6.26375500  | -1.58038400 | -0.11834400 |
| C  | 7.73118500  | -1.53769700 | -0.49584800 | C | 7.68085000  | -1.50379300 | -0.43901300 |
| H  | 8.34241200  | -1.67316800 | 0.41122400  | H | 8.27091700  | -1.73025600 | 0.46451700  |
| H  | 7.97228200  | -0.54077900 | -0.89929300 | H | 7.93074400  | -0.47138800 | -0.73493500 |
| H  | -1.56884800 | -3.36515000 | 1.73391000  | H | -1.63964800 | -3.38449600 | 1.60501100  |
| O  | 8.03312700  | -2.54333300 | -1.45044100 | O | 8.00047700  | -2.41171400 | -1.48292500 |
| C  | 9.39798300  | -2.52728500 | -1.82411500 | C | 9.37337800  | -2.36483900 | -1.82721100 |
| H  | 10.05709300 | -2.71186400 | -0.96331400 | H | 10.01654300 | -2.63590500 | -0.97657900 |
| H  | 9.53567400  | -3.32495100 | -2.55356400 | H | 9.52321400  | -3.08799300 | -2.62873800 |
| H  | 9.68222000  | -1.56933300 | -2.28344300 | H | 9.67006700  | -1.36769400 | -2.18547800 |
| 44 |             |             |             |   |             |             |             |
| C  | 1.04952400  | 3.64758200  | 0.76828700  | C | 1.27755300  | 3.46698400  | 0.82505000  |
| C  | 0.38841800  | 2.44543600  | 1.00198100  | C | 0.53915700  | 2.30662900  | 1.03454700  |
| C  | -0.13743200 | 1.70516900  | -0.06244300 | C | -0.11153700 | 1.67871700  | -0.03311100 |
| C  | -0.02595000 | 2.20939500  | -1.35808600 | C | -0.04543300 | 2.25125900  | -1.30249100 |
| C  | 0.61723400  | 3.41409200  | -1.60624800 | C | 0.67301000  | 3.41753800  | -1.52408300 |
| C  | 1.15855200  | 4.11715600  | -0.53471900 | C | 1.33851600  | 4.00767400  | -0.45356300 |
| H  | 1.45744300  | 4.21122100  | 1.59521900  | H | 1.78508300  | 3.94331300  | 1.65156500  |
| H  | -0.45460800 | 1.63787500  | -2.17144200 | H | -0.56709400 | 1.76014200  | -2.11377000 |
| H  | 0.70422800  | 3.79893000  | -2.61321500 | H | 0.72749600  | 3.85777200  | -2.51031500 |
| N  | -0.82754500 | 0.47556400  | 0.13897400  | N | -0.85190500 | 0.47808700  | 0.13855100  |
| C  | -0.33809700 | -0.74579000 | 0.56723600  | C | -0.39735900 | -0.77242600 | 0.51522800  |
| C  | -1.42388500 | -1.61482500 | 0.59550600  | C | -1.50958600 | -1.60658700 | 0.52088600  |

|    |             |             |             |    |             |             |             |
|----|-------------|-------------|-------------|----|-------------|-------------|-------------|
| C  | -2.51732300 | -0.82038700 | 0.16481200  | C  | -2.58052600 | -0.76339900 | 0.12914400  |
| C  | -3.94054200 | -1.24650000 | -0.00063200 | C  | -4.01436900 | -1.14445500 | -0.03583600 |
| O  | -4.30567100 | -2.39067900 | 0.23391200  | O  | -4.40916400 | -2.28505800 | 0.16845500  |
| N  | -4.76520500 | -0.24854800 | -0.43196400 | N  | -4.81846000 | -0.11586300 | -0.43080100 |
| C  | 1.05970900  | -1.01078900 | 0.87038800  | C  | 0.99071900  | -1.08707900 | 0.79856500  |
| C  | 1.54732000  | -1.76010900 | 1.91732700  | C  | 1.45174300  | -1.93571400 | 1.77967900  |
| S  | 2.36788500  | -0.47881100 | -0.16216400 | S  | 2.32001100  | -0.46247600 | -0.15180200 |
| C  | 2.95345900  | -1.90256700 | 1.91013400  | C  | 2.85704400  | -2.08352100 | 1.78806500  |
| H  | 0.90564900  | -2.17497500 | 2.68217200  | H  | 0.78973600  | -2.41408500 | 2.48746200  |
| C  | 3.56359600  | -1.26447800 | 0.85271700  | C  | 3.48999700  | -1.34893700 | 0.80939000  |
| H  | 3.51452500  | -2.44486500 | 2.65858300  | H  | 3.40238900  | -2.69647400 | 2.49203800  |
| Cl | 0.20519500  | 1.90480200  | 2.65131800  | Cl | 0.43323500  | 1.66676500  | 2.65466700  |
| Cl | 1.98760900  | 5.63451200  | -0.82536000 | Cl | 2.26931100  | 5.47093300  | -0.71418800 |
| H  | -4.36990500 | 0.66806100  | -0.58693700 | H  | -4.41069500 | 0.79859700  | -0.56151100 |
| N  | -2.14780400 | 0.42872700  | -0.11264700 | N  | -2.17432000 | 0.48397700  | -0.10601100 |
| C  | -6.45357300 | -1.29780400 | -1.77110800 | C  | -6.53180800 | -1.11223300 | -1.76877500 |
| C  | -6.90488100 | -0.67027800 | 0.56395600  | C  | -6.94155800 | -0.54149600 | 0.58655000  |
| C  | -7.94009500 | -1.19020400 | -2.11877800 | C  | -8.02369700 | -0.99600100 | -2.08701800 |
| H  | -6.19716900 | -2.33415500 | -1.50941500 | H  | -6.27278400 | -2.15309500 | -1.52968100 |
| H  | -5.83768200 | -1.00334000 | -2.62426300 | H  | -5.92827300 | -0.80109100 | -2.62472000 |
| C  | -8.40230300 | -0.54735400 | 0.27305800  | C  | -8.44311600 | -0.41137600 | 0.32435100  |
| H  | -6.67153500 | -1.67450800 | 0.94505400  | H  | -6.70126800 | -1.55650800 | 0.93238400  |
| H  | -6.59997100 | 0.05677800  | 1.32038700  | H  | -6.62078200 | 0.16375100  | 1.35683500  |
| C  | -8.81420900 | -1.46166200 | -0.88776400 | C  | -8.87137300 | -1.30521100 | -0.84645800 |
| H  | -8.17313600 | -1.89621600 | -2.92219400 | H  | -8.27126900 | -1.67802400 | -2.90642500 |
| H  | -8.14437900 | -0.18306600 | -2.49916200 | H  | -8.23583800 | 0.02260700  | -2.43084600 |
| H  | -8.96554600 | -0.79407800 | 1.17864100  | H  | -8.99157200 | -0.67401000 | 1.23432500  |
| H  | -8.63112300 | 0.49382000  | 0.01942200  | H  | -8.67429700 | 0.63396400  | 0.09073100  |
| H  | -9.87198400 | -1.32052600 | -1.13017400 | H  | -9.93519700 | -1.17066000 | -1.06417100 |
| H  | -8.69561400 | -2.50910300 | -0.58334900 | H  | -8.73223000 | -2.35713000 | -0.56723400 |
| N  | -6.14158700 | -0.37678400 | -0.66305500 | N  | -6.19947600 | -0.21543700 | -0.64604100 |
| C  | -1.42279800 | -3.06887800 | 0.95171700  | C  | -1.54893800 | -3.07058900 | 0.82574000  |
| H  | -2.13511700 | -3.61097900 | 0.33208200  | H  | -2.31047900 | -3.56085700 | 0.22233100  |
| H  | -0.42585700 | -3.49740900 | 0.83026100  | H  | -0.57453100 | -3.52896500 | 0.64294100  |
| C  | 4.93406100  | -1.18308100 | 0.54488400  | C  | 4.86604600  | -1.24462400 | 0.53996900  |
| C  | 6.10722700  | -1.11078700 | 0.26818000  | C  | 6.04355500  | -1.14685000 | 0.29347100  |
| C  | 7.52554300  | -1.00268600 | -0.04162700 | C  | 7.46653500  | -1.01525400 | 0.01873600  |

|    |             |             |             |    |             |             |             |
|----|-------------|-------------|-------------|----|-------------|-------------|-------------|
| H  | 8.10670600  | -1.04563900 | 0.89355100  | H  | 8.03115400  | -1.14252100 | 0.95695600  |
| H  | 7.72415500  | -0.01953100 | -0.49785800 | H  | 7.67315800  | 0.00504100  | -0.34403200 |
| H  | -1.73337300 | -3.22259600 | 1.99029500  | H  | -1.81549700 | -3.24728300 | 1.87287700  |
| O  | 7.92211000  | -2.04461300 | -0.91936900 | O  | 7.87332200  | -1.97752000 | -0.94230400 |
| C  | 9.30311800  | -1.97841100 | -1.25319200 | C  | 9.25965100  | -1.89122200 | -1.25013100 |
| H  | 9.91410100  | -2.04097200 | -0.33916300 | H  | 9.85983600  | -2.03966400 | -0.33828500 |
| H  | 9.52781700  | -1.01314200 | -1.73318500 | H  | 9.49883600  | -0.88967500 | -1.64175900 |
| C  | 9.61963500  | -3.12930200 | -2.18944800 | C  | 9.57483300  | -2.95965600 | -2.28001500 |
| H  | 10.67590200 | -3.11388000 | -2.47071100 | H  | 10.63385800 | -2.93312600 | -2.54974000 |
| H  | 9.40177800  | -4.08418700 | -1.70650300 | H  | 9.33903600  | -3.94885000 | -1.88202500 |
| H  | 9.01649800  | -3.05889800 | -3.09706900 | H  | 8.97927300  | -2.80218400 | -3.18168600 |
| 45 |             |             |             |    |             |             |             |
| C  | 0.66705200  | 3.71771000  | 0.80575500  | C  | 0.90290000  | 3.53920000  | 0.86120000  |
| C  | 0.02988300  | 2.50163500  | 1.03383600  | C  | 0.18750000  | 2.36340000  | 1.06400000  |
| C  | -0.46190000 | 1.74558500  | -0.03576200 | C  | -0.43410000 | 1.71820000  | -0.01070000 |
| C  | -0.34135300 | 2.24747000  | -1.33150500 | C  | -0.36290000 | 2.28860000  | -1.28080000 |
| C  | 0.27801100  | 3.46565100  | -1.57435100 | C  | 0.33260000  | 3.46990000  | -1.49590000 |
| C  | 0.78606500  | 4.18482800  | -0.49724600 | C  | 0.96970000  | 4.07760000  | -0.41810000 |
| H  | 1.04881200  | 4.29356700  | 1.63674800  | H  | 1.38820000  | 4.02890000  | 1.69330000  |
| H  | -0.74380000 | 1.66324200  | -2.14920900 | H  | -0.86210000 | 1.78370000  | -2.09780000 |
| H  | 0.37222200  | 3.84865800  | -2.58136600 | H  | 0.39110000  | 3.90850000  | -2.48270000 |
| N  | -1.12665200 | 0.50115400  | 0.15963200  | N  | -1.15020000 | 0.50200000  | 0.15440000  |
| C  | -0.61604500 | -0.70689500 | 0.60072400  | C  | -0.67350000 | -0.73710000 | 0.54100000  |
| C  | -1.68180800 | -1.60068800 | 0.61529000  | C  | -1.76720000 | -1.59540000 | 0.53410000  |
| C  | -2.78621100 | -0.83348500 | 0.16371700  | C  | -2.85090000 | -0.77710000 | 0.12530000  |
| C  | -4.19628600 | -1.29314400 | -0.02277700 | C  | -4.27380000 | -1.18970000 | -0.05750000 |
| O  | -4.53931200 | -2.44373900 | 0.21379600  | O  | -4.64680000 | -2.33760000 | 0.14660000  |
| N  | -5.03587700 | -0.31743600 | -0.47576800 | N  | -5.09430000 | -0.18040000 | -0.46820000 |
| C  | 0.78251900  | -0.93829800 | 0.92707100  | C  | 0.71710000  | -1.02040000 | 0.84420000  |
| C  | 1.27074000  | -1.67089400 | 1.98543200  | C  | 1.18300000  | -1.85670000 | 1.83350000  |
| S  | 2.09432000  | -0.38167800 | -0.08788300 | S  | 2.04560000  | -0.36850000 | -0.08890000 |
| C  | 2.67976900  | -1.78106100 | 2.00086900  | C  | 2.59100000  | -1.97310000 | 1.86210000  |
| H  | 0.62683300  | -2.09652500 | 2.74246500  | H  | 0.52190000  | -2.34820000 | 2.53310000  |
| C  | 3.29175200  | -1.13446700 | 0.94972100  | C  | 3.22140000  | -1.22670000 | 0.89080000  |
| H  | 3.24132600  | -2.30657400 | 2.76083100  | H  | 3.13990000  | -2.57230000 | 2.57520000  |
| Cl | -0.16725900 | 1.96312000  | 2.68226000  | Cl | 0.07330000  | 1.72560000  | 2.68440000  |
| Cl | 1.58490000  | 5.71966700  | -0.78089400 | Cl | 1.87150000  | 5.56050000  | -0.67020000 |



|   |              |             |             |   |              |             |             |
|---|--------------|-------------|-------------|---|--------------|-------------|-------------|
| H | -4.65932700  | 0.60729800  | -0.62915000 | H | -4.70470000  | 0.74220000  | -0.59700000 |
| N | -2.44124500  | 0.42277800  | -0.11310000 | N | -2.46900000  | 0.47830000  | -0.10810000 |
| C | -6.67861500  | -1.41428700 | -1.83310800 | C | -6.76850000  | -1.21920000 | -1.82330000 |
| C | -7.18113100  | -0.78011900 | 0.48963800  | C | -7.22070000  | -0.64700000 | 0.52390000  |
| C | -8.16141100  | -1.34295600 | -2.20511700 | C | -8.25840000  | -1.13650000 | -2.16110000 |
| H | -6.40319900  | -2.44261000 | -1.55935600 | H | -6.49040000  | -2.25320000 | -1.57600000 |
| H | -6.05586300  | -1.11227000 | -2.67859800 | H | -6.16080000  | -0.89900000 | -2.67290000 |
| C | -8.67613600  | -0.69346300 | 0.17420600  | C | -8.72120000  | -0.55040000 | 0.24190000  |
| H | -6.93111500  | -1.77590000 | 0.88215700  | H | -6.96310000  | -1.65500000 | 0.87760000  |
| H | -6.90494600  | -0.04071600 | 1.24514400  | H | -6.92520000  | 0.06840000  | 1.29490000  |
| C | -9.04872500  | -1.62523800 | -0.98602900 | C | -9.11510000  | -1.45840000 | -0.93010000 |
| H | -8.36557400  | -2.05993700 | -3.00667800 | H | -8.48070000  | -1.82730000 | -2.98040000 |
| H | -8.38229600  | -0.34353100 | -2.59642100 | H | -8.48790000  | -0.12420000 | -2.51240000 |
| H | -9.24801800  | -0.94640300 | 1.07263300  | H | -9.27560000  | -0.82090000 | 1.14600000  |
| H | -8.92438600  | 0.34038500  | -0.09086300 | H | -8.97180000  | 0.48860000  | 0.00050000  |
| H | -10.10542100 | -1.50989200 | -1.24615300 | H | -10.17870000 | -1.34780000 | -1.16200000 |
| H | -8.91137600  | -2.66749400 | -0.67185500 | H | -8.95700000  | -2.50590000 | -0.64420000 |
| N | -6.40521600  | -0.47833000 | -0.72740800 | N | -6.47000000  | -0.31050000 | -0.70070000 |
| C | -1.65269200  | -3.05297300 | 0.97766500  | C | -1.77870000  | -3.05920000 | 0.84250000  |
| H | -2.34275400  | -3.61380500 | 0.34955600  | H | -2.52210000  | -3.56730000 | 0.23130000  |
| H | -0.64433900  | -3.45870000 | 0.87308700  | H | -0.79240000  | -3.49680000 | 0.67280000  |
| C | 4.66464400   | -1.02348500 | 0.66238200  | C | 4.59840000   | -1.09250000 | 0.64010000  |
| C | 5.84047900   | -0.92806700 | 0.40445900  | C | 5.77720000   | -0.97120000 | 0.41090000  |
| C | 7.26042900   | -0.78659300 | 0.11243500  | C | 7.20020000   | -0.80550000 | 0.15200000  |
| H | 7.82562400   | -0.76960100 | 1.05814200  | H | 7.75090000   | -0.85390000 | 1.10570000  |
| H | 7.42589000   | 0.18296300  | -0.37910500 | H | 7.36910000   | 0.19730000  | -0.26670000 |
| H | -1.97536200  | -3.20975900 | 2.01207800  | H | -2.05400000  | -3.23910000 | 1.88680000  |
| O | 7.69943300   | -1.86357400 | -0.70239700 | O | 7.65170000   | -1.82180000 | -0.73200000 |
| C | 9.11666000   | -1.90613000 | -0.92064000 | C | 9.07320000   | -1.86730000 | -0.91440000 |
| H | 9.62228200   | -1.71707700 | 0.03971900  | H | 9.55720000   | -1.80410000 | 0.07390000  |
| C | 9.56464600   | -0.85564300 | -1.93913200 | C | 9.56870000   | -0.71620000 | -1.79180000 |
| H | 10.64215200  | -0.92591600 | -2.11211800 | H | 10.64530000  | -0.80220000 | -1.96250000 |
| H | 9.04958200   | -1.01395400 | -2.89040300 | H | 9.05870000   | -0.74320000 | -2.75840000 |
| H | 9.35287600   | 0.16122300  | -1.59961900 | H | 9.38450000   | 0.25790000  | -1.33240000 |
| C | 9.42688700   | -3.32557100 | -1.37673000 | C | 9.36520000   | -3.22900000 | -1.52890000 |
| H | 9.09607100   | -4.04565500 | -0.62612700 | H | 8.99180000   | -4.02300000 | -0.87990000 |
| H | 8.90384000   | -3.54211000 | -2.31184200 | H | 8.86510000   | -3.31440000 | -2.49710000 |

|    |             |             |             |    |             |             |             |
|----|-------------|-------------|-------------|----|-------------|-------------|-------------|
| H  | 10.49987800 | -3.45462500 | -1.54026400 | H  | 10.43940000 | -3.36590000 | -1.67640000 |
| 46 |             |             |             |    |             |             |             |
| C  | 0.59502500  | 3.76163500  | 0.74388500  | C  | 0.83430000  | 3.58940000  | 0.79610000  |
| C  | -0.01562600 | 2.53410200  | 0.98312000  | C  | 0.14400000  | 2.40090000  | 1.01190000  |
| C  | -0.52050500 | 1.77317500  | -0.07690700 | C  | -0.48990000 | 1.74710000  | -0.05040000 |
| C  | -0.44089900 | 2.28168500  | -1.37325800 | C  | -0.45720000 | 2.32160000  | -1.32020000 |
| C  | 0.15114700  | 3.51121400  | -1.62670100 | C  | 0.21250000  | 3.51540000  | -1.54780000 |
| C  | 0.67369800  | 4.23522400  | -0.55980100 | C  | 0.86310000  | 4.13170000  | -0.48290000 |
| H  | 0.98741900  | 4.34107400  | 1.56740000  | H  | 1.32950000  | 4.08570000  | 1.61830000  |
| H  | -0.85391100 | 1.69358600  | -2.18288100 | H  | -0.96610000 | 1.81010000  | -2.12700000 |
| H  | 0.21331300  | 3.89949200  | -2.63419300 | H  | 0.24080000  | 3.95740000  | -2.53430000 |
| N  | -1.15853600 | 0.51668000  | 0.12967900  | N  | -1.18060000 | 0.51810000  | 0.12710000  |
| C  | -0.61689300 | -0.68305900 | 0.55635400  | C  | -0.67410000 | -0.71300000 | 0.50170000  |
| C  | -1.66580400 | -1.59591600 | 0.59096000  | C  | -1.75210000 | -1.59090000 | 0.51390000  |
| C  | -2.79323700 | -0.84782700 | 0.16490100  | C  | -2.85810000 | -0.79170000 | 0.12750000  |
| C  | -4.19831600 | -1.33266600 | 0.00719300  | C  | -4.27640000 | -1.22990000 | -0.02900000 |
| O  | -4.51483600 | -2.49043200 | 0.24579000  | O  | -4.62390000 | -2.38550000 | 0.17690000  |
| N  | -5.06549700 | -0.37066700 | -0.42265400 | N  | -5.12360000 | -0.23420000 | -0.41840000 |
| C  | 0.79224000  | -0.88991800 | 0.85251400  | C  | 0.72680000  | -0.97180000 | 0.77800000  |
| C  | 1.31712500  | -1.60769300 | 1.90281300  | C  | 1.22740000  | -1.79600000 | 1.75990000  |
| S  | 2.07217100  | -0.31521900 | -0.19397600 | S  | 2.02590000  | -0.29700000 | -0.18130000 |
| C  | 2.72845000  | -1.69193800 | 1.88850600  | C  | 2.63820000  | -1.88510000 | 1.76320000  |
| H  | 0.69793000  | -2.04031000 | 2.67640800  | H  | 0.58910000  | -2.29770000 | 2.47340000  |
| C  | 3.30575000  | -1.04041500 | 0.82126100  | C  | 3.23620000  | -1.12970000 | 0.77890000  |
| H  | 3.31597500  | -2.20227100 | 2.63909900  | H  | 3.21160000  | -2.47100000 | 2.46790000  |
| Cl | -0.16384500 | 1.98781800  | 2.63400500  | Cl | 0.07650000  | 1.75870000  | 2.63300000  |
| Cl | 1.43905100  | 5.78444500  | -0.85735400 | Cl | 1.73310000  | 5.63060000  | -0.75140000 |
| H  | -4.70941200 | 0.56153600  | -0.57967800 | H  | -4.75380000 | 0.69610000  | -0.55020000 |
| N  | -2.47702700 | 0.41509800  | -0.11584400 | N  | -2.50360000 | 0.47080000  | -0.11070000 |
| C  | -6.71777300 | -1.49190500 | -1.74818700 | C  | -6.80540000 | -1.29820000 | -1.74420000 |
| C  | -7.18007400 | -0.87634700 | 0.58786200  | C  | -7.22050000 | -0.74440000 | 0.61420000  |
| C  | -8.20953000 | -1.44611700 | -2.08698000 | C  | -8.30300000 | -1.24180000 | -2.05150000 |
| H  | -6.41773900 | -2.51613100 | -1.48514900 | H  | -6.50310000 | -2.32780000 | -1.50740000 |
| H  | -6.11954300 | -1.17518000 | -2.60592400 | H  | -6.22100000 | -0.96300000 | -2.60450000 |
| C  | -8.68301200 | -0.81555700 | 0.30593000  | C  | -8.72790000 | -0.67470000 | 0.36300000  |
| H  | -6.90347300 | -1.86900700 | 0.97033700  | H  | -6.93700000 | -1.74890000 | 0.95810000  |
| H  | -6.90058200 | -0.13512300 | 1.34035400  | H  | -6.92270000 | -0.02680000 | 1.38230000  |

|    |              |             |             |   |              |             |             |
|----|--------------|-------------|-------------|---|--------------|-------------|-------------|
| C  | -9.06432900  | -1.74934000 | -0.84983100 | C | -9.12840000  | -1.58500000 | -0.80490000 |
| H  | -8.41843500  | -2.16348000 | -2.88698400 | H | -8.52910000  | -1.93310000 | -2.86940000 |
| H  | -8.45710900  | -0.44931200 | -2.46887800 | H | -8.55840000  | -0.23250000 | -2.39330000 |
| H  | -9.23020100  | -1.08235800 | 1.21565200  | H | -9.25870000  | -0.95930000 | 1.27690000  |
| H  | -8.95568000  | 0.21465100  | 0.05087600  | H | -9.00260000  | 0.36050000  | 0.13150000  |
| H  | -10.12844400 | -1.65218800 | -1.08604500 | H | -10.19840000 | -1.49340000 | -1.01480000 |
| H  | -8.90123100  | -2.79016600 | -0.54331800 | H | -8.94500000  | -2.63050000 | -0.52710000 |
| N  | -6.43690700  | -0.55558500 | -0.64469900 | N | -6.50100000  | -0.38880000 | -0.62370000 |
| C  | -1.60257200  | -3.04807500 | 0.94936400  | C | -1.73100000  | -3.05490000 | 0.82030000  |
| H  | -2.29084700  | -3.62141700 | 0.33057500  | H | -2.47410000  | -3.57650000 | 0.22010000  |
| H  | -0.58799800  | -3.43331200 | 0.82868600  | H | -0.73930000  | -3.47340000 | 0.63470000  |
| C  | 4.67053900   | -0.90819900 | 0.50248300  | C | 4.60620000   | -0.97170000 | 0.50100000  |
| C  | 5.84127500   | -0.79508500 | 0.22665400  | C | 5.78050000   | -0.83020000 | 0.25810000  |
| C  | 7.25126100   | -0.65299400 | -0.12133900 | C | 7.19470000   | -0.66440000 | -0.05670000 |
| H  | 7.80730700   | -0.36916900 | 0.77838200  | H | 7.73840000   | -0.45330000 | 0.87010000  |
| H  | 7.35235600   | 0.19438600  | -0.82558800 | H | 7.30710000   | 0.23460000  | -0.69210000 |
| H  | -1.90627500  | -3.21336000 | 1.98815300  | H | -1.98640000  | -3.24130000 | 1.86850000  |
| C  | 9.15644700   | -1.76564600 | -1.23068400 | C | 9.10280000   | -1.68910000 | -1.24090000 |
| H  | 9.20587000   | -0.89109000 | -1.90725100 | H | 9.14370000   | -0.78440000 | -1.87760000 |
| C  | 9.45978800   | -3.02021400 | -2.05122500 | C | 9.42880000   | -2.90290000 | -2.11250000 |
| H  | 10.45701600  | -2.96356900 | -2.49393900 | H | 10.42750000  | -2.81200000 | -2.54630000 |
| H  | 9.41060000   | -3.90901100 | -1.41629800 | H | 9.38950000   | -3.81690000 | -1.51370000 |
| H  | 8.73941100   | -3.14334300 | -2.86623000 | H | 8.71420000   | -3.00280000 | -2.93570000 |
| C  | 10.19885300  | -1.56632400 | -0.12559900 | C | 10.13670000  | -1.52630000 | -0.12200000 |
| H  | 10.02777200  | -0.64703800 | 0.43998400  | H | 9.95970000   | -0.62750000 | 0.47360000  |
| H  | 10.16832200  | -2.40637500 | 0.57365100  | H | 10.10030000  | -2.39140000 | 0.54580000  |
| H  | 11.20254100  | -1.50265400 | -0.55439000 | H | 11.14310000  | -1.44720000 | -0.54140000 |
| N  | 7.81000400   | -1.90142700 | -0.65494900 | N | 7.75700000   | -1.87060000 | -0.67740000 |
| H  | 7.17808600   | -2.24989400 | -1.36903800 | H | 7.12610000   | -2.17020000 | -1.41410000 |
| 47 |              |             |             |   |              |             |             |
| C  | 1.20785700   | 3.63891900  | 0.82009400  | C | 1.47040000   | 3.43560000  | 0.87500000  |
| C  | 0.54320900   | 2.43518800  | 1.03505600  | C | 0.71610000   | 2.28340000  | 1.07270000  |
| C  | -0.01451400  | 1.73022000  | -0.03710100 | C | 0.04230000   | 1.68560000  | 0.00210000  |
| C  | 0.06847000   | 2.27192800  | -1.31973500 | C | 0.10140000   | 2.28070000  | -1.25720000 |
| C  | 0.71446100   | 3.47892000  | -1.54851400 | C | 0.83530000   | 3.43960000  | -1.46650000 |
| C  | 1.28803500   | 4.14610000  | -0.47081500 | C | 1.52380000   | 3.99900000  | -0.39410000 |
| H  | 1.64069100   | 4.17491300  | 1.65271900  | H | 1.99610000   | 3.88830000  | 1.70350000  |

|    |             |             |             |    |             |             |             |
|----|-------------|-------------|-------------|----|-------------|-------------|-------------|
| H  | -0.38512500 | 1.72788500  | -2.13838900 | H  | -0.43860000 | 1.81320000  | -2.07050000 |
| H  | 0.77896500  | 3.89295100  | -2.54555200 | H  | 0.88390000  | 3.89750000  | -2.44500000 |
| N  | -0.70871000 | 0.49993900  | 0.14485700  | N  | -0.71440000 | 0.49340000  | 0.16080000  |
| C  | -0.21864000 | -0.73602000 | 0.52825600  | C  | -0.27440000 | -0.77060000 | 0.50890000  |
| C  | -1.30939400 | -1.59881500 | 0.55418900  | C  | -1.39910000 | -1.58810000 | 0.51090000  |
| C  | -2.40606100 | -0.78610800 | 0.16817900  | C  | -2.46130000 | -0.72200000 | 0.14660000  |
| C  | -3.83485900 | -1.19919600 | 0.01945300  | C  | -3.90230000 | -1.07880000 | -0.01020000 |
| O  | -4.20219600 | -2.34784400 | 0.22742300  | O  | -4.31170000 | -2.21750000 | 0.17510000  |
| N  | -4.66195700 | -0.18434500 | -0.36535000 | N  | -4.69530000 | -0.03070000 | -0.37530000 |
| C  | 1.18331400  | -1.01801800 | 0.79470900  | C  | 1.11150000  | -1.11100000 | 0.77130000  |
| C  | 1.68890700  | -1.79242700 | 1.81380800  | C  | 1.57110000  | -1.98280000 | 1.73200000  |
| S  | 2.47341400  | -0.47249400 | -0.25489000 | S  | 2.44110000  | -0.48810000 | -0.18160000 |
| C  | 3.09394700  | -1.94450600 | 1.77241000  | C  | 2.97450000  | -2.15170000 | 1.72230000  |
| H  | 1.06143500  | -2.21871400 | 2.58423600  | H  | 0.91010000  | -2.46350000 | 2.43930000  |
| C  | 3.68614800  | -1.28846500 | 0.71587400  | C  | 3.60850000  | -1.40930000 | 0.75030000  |
| H  | 3.66688000  | -2.50543200 | 2.49781100  | H  | 3.51780000  | -2.78440000 | 2.41030000  |
| Cl | 0.39570100  | 1.84870500  | 2.67222200  | Cl | 0.62010000  | 1.61580000  | 2.68210000  |
| Cl | 2.12143400  | 5.66543600  | -0.73761100 | Cl | 2.47470000  | 5.45190000  | -0.63990000 |
| H  | -4.26431400 | 0.73443500  | -0.50020700 | H  | -4.27550000 | 0.88020000  | -0.49180000 |
| N  | -2.03408600 | 0.46806400  | -0.08173800 | N  | -2.03910000 | 0.52340000  | -0.06980000 |
| C  | -6.38420800 | -1.18390600 | -1.69923300 | C  | -6.43700000 | -0.97480000 | -1.71470000 |
| C  | -6.78336500 | -0.62296800 | 0.66207300  | C  | -6.81380000 | -0.44610000 | 0.65590000  |
| C  | -7.87684700 | -1.05760400 | -2.01273000 | C  | -7.93020000 | -0.83040000 | -2.01470000 |
| H  | -6.12907400 | -2.22897600 | -1.47344500 | H  | -6.19090000 | -2.02390000 | -1.49930000 |
| H  | -5.78416000 | -0.86794700 | -2.55598400 | H  | -5.83780000 | -0.65510000 | -2.57060000 |
| C  | -8.28563400 | -0.48283200 | 0.40598500  | C  | -8.31590000 | -0.28880000 | 0.41240000  |
| H  | -6.54864900 | -1.63932900 | 1.00864000  | H  | -6.58490000 | -1.47130000 | 0.97860000  |
| H  | -6.45836900 | 0.07970300  | 1.43304500  | H  | -6.47470000 | 0.23870000  | 1.43670000  |
| C  | -8.72720400 | -1.36013400 | -0.77235800 | C  | -8.76950000 | -1.15230000 | -0.77160000 |
| H  | -8.13082600 | -1.73831600 | -2.83149700 | H  | -8.19630000 | -1.49200000 | -2.84490000 |
| H  | -8.08250900 | -0.03855200 | -2.35912100 | H  | -8.13080000 | 0.19790000  | -2.33570000 |
| H  | -8.83175600 | -0.75278300 | 1.31541800  | H  | -8.85880000 | -0.56180000 | 1.32260000  |
| H  | -8.51287500 | 0.56666900  | 0.18773300  | H  | -8.53400000 | 0.76430000  | 0.20230000  |
| H  | -9.78880600 | -1.20574000 | -0.98853400 | H  | -9.83340000 | -0.99790000 | -0.97520000 |
| H  | -8.60914500 | -2.41676800 | -0.50132100 | H  | -8.64300000 | -2.21160000 | -0.51510000 |
| N  | -6.04360400 | -0.29781800 | -0.57135000 | N  | -6.07980000 | -0.10590000 | -0.57770000 |
| C  | -1.31049400 | -3.06220500 | 0.87003300  | C  | -1.45710000 | -3.05670000 | 0.78900000  |

|    |             |             |             |   |             |             |             |
|----|-------------|-------------|-------------|---|-------------|-------------|-------------|
| H  | -2.03390700 | -3.58400500 | 0.24574100  | H | -2.23150000 | -3.52460000 | 0.18410000  |
| H  | -0.31721200 | -3.49127400 | 0.72288100  | H | -0.49120000 | -3.52550000 | 0.58830000  |
| C  | 5.05055000  | -1.21010000 | 0.37784500  | C | 4.98260000  | -1.32110000 | 0.46340000  |
| C  | 6.22110200  | -1.12997800 | 0.08395400  | C | 6.16100000  | -1.22610000 | 0.21120000  |
| C  | 7.64431400  | -1.07290000 | -0.29492700 | C | 7.58390000  | -1.18040000 | -0.16520000 |
| H  | 8.25285600  | -1.10135300 | 0.61551100  | H | 8.19040000  | -1.46450000 | 0.70150000  |
| H  | 7.84294500  | -0.10643400 | -0.77084300 | H | 7.85500000  | -0.14760000 | -0.40950000 |
| H  | -1.60725700 | -3.24323300 | 1.90821100  | H | -1.71620000 | -3.24930000 | 1.83520000  |
| N  | 8.11636000  | -2.12833900 | -1.19172000 | N | 7.96450000  | -2.03400000 | -1.29310000 |
| C  | 8.05150800  | -3.45560000 | -0.59196900 | C | 7.78070000  | -3.45360000 | -1.01040000 |
| H  | 8.59160900  | -3.45620800 | 0.35856200  | H | 8.32190000  | -3.72050000 | -0.09880000 |
| H  | 7.02191700  | -3.80461000 | -0.40426200 | H | 6.72300000  | -3.73970000 | -0.88080000 |
| H  | 8.53928200  | -4.17323700 | -1.25615600 | H | 8.19650000  | -4.04040000 | -1.83310000 |
| C  | 7.48644300  | -2.08261200 | -2.50574300 | C | 7.31920000  | -1.63680000 | -2.54000000 |
| H  | 7.61694200  | -1.08853300 | -2.94158300 | H | 7.52410000  | -0.58200000 | -2.74110000 |
| H  | 7.97631400  | -2.80491500 | -3.16330000 | H | 7.73510000  | -2.22370000 | -3.36260000 |
| H  | 6.40749500  | -2.31171800 | -2.48549100 | H | 6.22530000  | -1.78080000 | -2.53080000 |
| 48 |             |             |             |   |             |             |             |
| C  | -0.17877400 | 3.87165700  | 0.64690600  | C | 0.08949200  | 3.69343300  | 0.72300800  |
| C  | -0.76965700 | 2.64478400  | 0.93389400  | C | -0.59021800 | 2.50704500  | 0.97969100  |
| C  | -1.18642800 | 1.79802800  | -0.09899000 | C | -1.13998800 | 1.76421000  | -0.07077200 |
| C  | -1.03868000 | 2.21853000  | -1.42062900 | C | -1.03390500 | 2.24629900  | -1.37450800 |
| C  | -0.46480100 | 3.44562800  | -1.72305900 | C | -0.37330000 | 3.43629000  | -1.64480100 |
| C  | -0.03062500 | 4.25713100  | -0.67969300 | C | 0.19292300  | 4.14306300  | -0.58783900 |
| H  | 0.14480900  | 4.51828400  | 1.45008000  | H | 0.51908000  | 4.25937400  | 1.53712800  |
| H  | -1.38350000 | 1.56380000  | -2.21080400 | H | -1.47779900 | 1.66610500  | -2.17317200 |
| H  | -0.34918100 | 3.76555400  | -2.74966800 | H | -0.28742100 | 3.80665300  | -2.65716200 |
| N  | -1.80254400 | 0.53940100  | 0.15660000  | N | -1.81718200 | 0.53486500  | 0.15197800  |
| C  | -1.25610500 | -0.61188700 | 0.69559300  | C | -1.31156500 | -0.65450400 | 0.64376100  |
| C  | -2.28084100 | -1.55166800 | 0.73422600  | C | -2.37193800 | -1.55355100 | 0.65829000  |
| C  | -3.40053200 | -0.86804500 | 0.19447500  | C | -3.46783400 | -0.80868100 | 0.15265300  |
| C  | -4.78101800 | -1.40487000 | -0.00816500 | C | -4.86654600 | -1.28891300 | -0.05192200 |
| O  | -5.07973600 | -2.55250100 | 0.29358700  | O | -5.20464800 | -2.43292200 | 0.22266000  |
| N  | -5.64626300 | -0.50162000 | -0.55321800 | N | -5.70624900 | -0.34526400 | -0.56627000 |
| C  | 0.13820500  | -0.75601900 | 1.08451400  | C | 0.07535600  | -0.86110500 | 1.01761500  |
| C  | 0.61846000  | -1.39431900 | 2.20607100  | C | 0.53205900  | -1.61009100 | 2.07902000  |
| S  | 1.45992800  | -0.20641600 | 0.07957000  | S | 1.41388500  | -0.22070200 | 0.09181600  |

|    |              |             |             |    |              |             |             |
|----|--------------|-------------|-------------|----|--------------|-------------|-------------|
| C  | 2.02908200   | -1.43758300 | 2.27674400  | C  | 1.94084300   | -1.66850700 | 2.16749600  |
| H  | -0.03362700  | -1.79871800 | 2.96761500  | H  | -0.13761800  | -2.07941900 | 2.78553900  |
| C  | 2.64946000   | -0.83308700 | 1.20551100  | C  | 2.58014500   | -0.96397700 | 1.17087700  |
| H  | 2.58485100   | -1.88540100 | 3.08893700  | H  | 2.48286400   | -2.19621100 | 2.93980400  |
| Cl | -1.00528300  | 2.20679100  | 2.60693400  | Cl | -0.75139400  | 1.97918200  | 2.63530400  |
| Cl | 0.70988700   | 5.80524100  | -1.03777700 | Cl | 1.04966100   | 5.63899500  | -0.90808400 |
| H  | -5.30614900  | 0.42769900  | -0.75606600 | H  | -5.34606600  | 0.58035500  | -0.74821700 |
| N  | -3.10123300  | 0.38193700  | -0.15425400 | N  | -3.12277600  | 0.44117900  | -0.15550400 |
| C  | -7.18667800  | -1.76068700 | -1.88987900 | C  | -7.28732900  | -1.54463200 | -1.90051500 |
| C  | -7.80318900  | -1.00107700 | 0.36694500  | C  | -7.85168300  | -0.82073200 | 0.37965500  |
| C  | -8.65621400  | -1.78331100 | -2.31650500 | C  | -8.76469500  | -1.54475800 | -2.29780600 |
| H  | -6.87628300  | -2.75502500 | -1.53890100 | H  | -6.98215800  | -2.54625200 | -1.56695700 |
| H  | -6.54693000  | -1.48541100 | -2.73180000 | H  | -6.65857000  | -1.26388100 | -2.74876600 |
| C  | -9.28776800  | -1.00567900 | -0.00473400 | C  | -9.34248500  | -0.80376600 | 0.03667600  |
| H  | -7.52369800  | -1.95629000 | 0.83344900  | H  | -7.57167900  | -1.78934800 | 0.81664800  |
| H  | -7.58886300  | -0.20179700 | 1.08038600  | H  | -7.61288700  | -0.03979900 | 1.10542900  |
| C  | -9.57487500  | -2.02730400 | -1.11246200 | C  | -9.65688500  | -1.80932300 | -1.07830700 |
| H  | -8.79807000  | -2.55955500 | -3.07514200 | H  | -8.92946300  | -2.30158100 | -3.07106000 |
| H  | -8.90664300  | -0.82285000 | -2.78075800 | H  | -9.01667300  | -0.57052200 | -2.73155000 |
| H  | -9.88084000  | -1.22638000 | 0.88842200  | H  | -9.92166600  | -1.02912500 | 0.93755000  |
| H  | -9.57196900  | -0.00406200 | -0.34635400 | H  | -9.62095600  | 0.20441900  | -0.29005500 |
| H  | -10.62521400 | -1.97880200 | -1.41571500 | H  | -10.71383500 | -1.75737500 | -1.35640300 |
| H  | -9.40299500  | -3.03938900 | -0.72517300 | H  | -9.47232600  | -2.82621800 | -0.70991700 |
| N  | -6.99671100  | -0.74303700 | -0.84024700 | N  | -7.06618200  | -0.54554500 | -0.83836300 |
| C  | -2.20171700  | -2.97391100 | 1.19478800  | C  | -2.34254000  | -2.99134100 | 1.07020100  |
| H  | -2.83806000  | -3.60719700 | 0.57895300  | H  | -3.04399600  | -3.56913800 | 0.47149500  |
| H  | -1.17269500  | -3.33731300 | 1.15841200  | H  | -1.33578800  | -3.40209900 | 0.96662300  |
| C  | 4.02582800   | -0.67760300 | 0.95959000  | C  | 3.95994700   | -0.79154700 | 0.96405900  |
| C  | 5.20438900   | -0.54541400 | 0.73375200  | C  | 5.14054300   | -0.63728800 | 0.76761300  |
| C  | 6.62455000   | -0.35213200 | 0.49236200  | C  | 6.56280500   | -0.42531200 | 0.56175200  |
| H  | 7.15846200   | -0.29464500 | 1.45023400  | H  | 7.08723500   | -0.47095500 | 1.52603800  |
| H  | 6.78384000   | 0.59678500  | -0.03687400 | H  | 6.72929900   | 0.57410500  | 0.13694100  |
| H  | -2.56190800  | -3.07747700 | 2.22345000  | H  | -2.65035700  | -3.10754800 | 2.11446200  |
| O  | 7.12473900   | -1.44091600 | -0.28646800 | O  | 7.06477000   | -1.42941900 | -0.32331000 |
| C  | 8.45179300   | -1.43513400 | -0.62002900 | C  | 8.39340000   | -1.39450800 | -0.64706500 |
| C  | 9.36267300   | -0.44042600 | -0.25568400 | C  | 9.30775400   | -0.44869800 | -0.17558000 |
| C  | 8.88189200   | -2.52750400 | -1.38343300 | C  | 8.82126200   | -2.40290200 | -1.51926400 |

|   |             |             |             |   |             |             |             |
|---|-------------|-------------|-------------|---|-------------|-------------|-------------|
| C | 10.69594000 | -0.54906500 | -0.65923500 | C | 10.64235900 | -0.52226500 | -0.58274500 |
| H | 9.05725600  | 0.41378300  | 0.33342800  | H | 9.00459400  | 0.34043400  | 0.49899800  |
| C | 10.20880500 | -2.62040200 | -1.77599400 | C | 10.14959800 | -2.46204900 | -1.91385800 |
| H | 8.15542600  | -3.28454200 | -1.65233900 | H | 8.09071400  | -3.12212100 | -1.86855100 |
| C | 11.12724800 | -1.63072800 | -1.41652500 | C | 11.07161300 | -1.52087700 | -1.44807200 |
| H | 11.39642600 | 0.22731000  | -0.37218700 | H | 11.34571700 | 0.21531300  | -0.21254500 |
| H | 10.53000300 | -3.47091600 | -2.36689200 | H | 10.46906400 | -3.24746200 | -2.58963500 |
| H | 12.16315000 | -1.70616600 | -1.72471700 | H | 12.10858500 | -1.56945200 | -1.75800000 |

1. Tseng, S.-L.; Hung, M.-S.; Chang, C.-P.; Song, J.-S.; Tai, C.-L.; Chiu, H.-H.; Hsieh, W.-P.; Lin, Y.; Chung, W.-L.; Kuo, C.-W. *Journal of medicinal chemistry* 2008, 51(17), 5397-5412.
